# Supplementary material for: Immune Trait Shifts in Association With Tobacco Smoking: A Study in Healthy Women
Source: Front Immunol. 2021 Mar 9;12:637974. doi: 10.3389/fimmu.2021.637974 (PMC7985448; doi:10.3389/fimmu.2021.637974)
Supplement: Supplementary file 1 [file Data_Sheet_1.CSV]

Population	Lineage	Subset.name	N	Beta	SE	P	eP	significant
T Cell	CD8	CD8/28-127-	223	-0.304	0.172	0.079	NA	FALSE
T Cell	DNT	DNT/31-57-95-127+244-RA+	196	0.185	0.191	0.335	NA	FALSE
B Cell	B cells/MD+	B cells/MD+/5-10+24+27-95-	222	-0.052	0.119	0.662	NA	FALSE
B Cell	B cells/MD+	B cells/MD+/10+24+27-95-	222	-0.091	0.114	0.43	NA	FALSE
B Cell	B cells/MD+	B cells/MD+/5+10+24+27-95-	219	-0.158	0.148	0.288	NA	FALSE
B Cell	B cells/A	B cells/A/10-24+27-95-	210	-0.122	0.14	0.385	NA	FALSE
B Cell	B cells/MD+	B cells/MD+/5-10-21+24+27-95-	221	0.089	0.1	0.374	NA	FALSE
B Cell	B cells/MD+	B cells/MD+/10-21+24+27-95-	220	0.052	0.096	0.588	NA	FALSE
B Cell	B cells/MD+	B cells/MD+/5+10-21+24+27-95-	220	0.062	0.142	0.661	NA	FALSE
B Cell	B cells/MD+	B cells/MD+/5-21+24+27-95-	221	0.06	0.088	0.498	NA	FALSE
B Cell	B cells/MD+	B cells/MD+/21+24+27-95-	221	0.011	0.086	0.899	NA	FALSE
B Cell	B cells/MD+	B cells/MD+/5+21+24+27-95-	223	-0.024	0.14	0.863	NA	FALSE
T Cell	DNT	DNT/27+31-57-95-127+244-RA+	195	0.186	0.198	0.35	NA	FALSE
B Cell	B cells/MD+	B cells/MD+/5-10+21+24+27-95-	222	-0.076	0.126	0.548	NA	FALSE
B Cell	B cells/MD+	B cells/MD+/10+21+24+27-95-	222	-0.115	0.121	0.345	NA	FALSE
B Cell	B cells/MD+	B cells/MD+/5+10+21+24+27-95-	218	-0.145	0.155	0.35	NA	FALSE
B Cell	B cells/MD+	B cells/MD+/5-10-21-24-95-	221	-0.064	0.121	0.599	NA	FALSE
B Cell	B cells/MD+	B cells/MD+/10-21-24-95-	221	-0.063	0.12	0.602	NA	FALSE
B Cell	B cells/MD+	B cells/MD+/5-21-24-95-	221	-0.067	0.121	0.577	NA	FALSE
B Cell	B cells/MD+	B cells/MD+/21-24-95-	221	-0.066	0.119	0.582	NA	FALSE
T Cell	DNT	DNT/28+31-57-95-127+244-RA+	195	0.157	0.199	0.43	NA	FALSE
B Cell	B cells/MD+	B cells/MD+/5-10-24-95-	216	-0.021	0.026	0.437	NA	FALSE
B Cell	B cells/MD+	B cells/MD+/10-24-95-	217	-0.009	0.024	0.712	NA	FALSE
B Cell	B cells/A	B cells/A/5-24+27-95-	209	-0.059	0.14	0.676	NA	FALSE
B Cell	B cells/MD+	B cells/MD+/5+10-24-95-	220	0.113	0.099	0.255	NA	FALSE
B Cell	B cells/MD+	B cells/MD+/5-24-95-	215	-0.022	0.025	0.379	NA	FALSE
B Cell	B cells/MD+	B cells/MD+/24-95-	218	-0.007	0.024	0.771	NA	FALSE
B Cell	B cells/MD+	B cells/MD+/5+24-95-	220	0.081	0.101	0.421	NA	FALSE
B Cell	B cells/MD+	B cells/MD+/5-10+24-95-	221	0.02	0.181	0.912	NA	FALSE
B Cell	B cells/MD+	B cells/MD+/10+24-95-	222	-0.021	0.17	0.902	NA	FALSE
B Cell	B cells/MD+	B cells/MD+/5-10-21+24-95-	215	-0.02	0.03	0.506	NA	FALSE
B Cell	B cells/MD+	B cells/MD+/10-21+24-95-	215	-0.01	0.028	0.726	NA	FALSE
B Cell	B cells/MD+	B cells/MD+/5+10-21+24-95-	221	0.094	0.106	0.377	NA	FALSE
B Cell	B cells/A	B cells/A/24+27-95-	212	-0.076	0.138	0.583	NA	FALSE
B Cell	B cells/MD+	B cells/MD+/5-21+24-95-	215	-0.018	0.029	0.534	NA	FALSE
B Cell	B cells/MD+	B cells/MD+/21+24-95-	215	-0.01	0.027	0.72	NA	FALSE
B Cell	B cells/MD+	B cells/MD+/5+21+24-95-	221	0.061	0.107	0.568	NA	FALSE
T Cell	DNT	DNT/27-28-57-95-127+244-RA+	194	0.211	0.193	0.277	NA	FALSE
B Cell	B cells/MD+	B cells/MD+/5-10+21+24-95-	220	0.038	0.185	0.837	NA	FALSE
B Cell	B cells/MD+	B cells/MD+/10+21+24-95-	221	-0.035	0.171	0.837	NA	FALSE
B Cell	B cells/MD+	B cells/MD+/5-10-21-95-	222	-0.049	0.116	0.675	NA	FALSE
B Cell	B cells/MD+	B cells/MD+/10-21-95-	222	-0.049	0.116	0.676	NA	FALSE
B Cell	B cells/MD+	B cells/MD+/5-21-95-	222	-0.053	0.112	0.634	NA	FALSE
B Cell	B cells/MD+	B cells/MD+/21-95-	222	-0.055	0.111	0.623	NA	FALSE
T Cell	DNT	DNT/28-57-95-127+244-RA+	196	0.331	0.227	0.147	NA	FALSE
B Cell	B cells/MD+	B cells/MD+/5+21-95-	214	0.032	0.145	0.826	NA	FALSE
B Cell	B cells/MD+	B cells/MD+/5-10+21-95-	217	-0.021	0.157	0.893	NA	FALSE
B Cell	B cells/MD+	B cells/MD+/10+21-95-	219	-0.113	0.154	0.467	NA	FALSE
B Cell	B cells/MD+	B cells/MD+/5-10-95-	219	-0.005	0.014	0.698	NA	FALSE
B Cell	B cells/MD+	B cells/MD+/10-95-	218	0.008	0.009	0.407	NA	FALSE
B Cell	B cells/MD+	B cells/MD+/5+10-95-	220	0.102	0.097	0.294	NA	FALSE
B Cell	B cells/MD+	B cells/MD+/5-95-	219	-0.005	0.009	0.601	NA	FALSE
B Cell	B cells/MD+	B cells/MD+/95-	214	-0.003	0.003	0.434	NA	FALSE
T Cell	DNT	DNT/27+28-57-95-127+244-RA+	194	0.315	0.24	0.191	NA	FALSE
B Cell	B cells/MD+	B cells/MD+/5+95-	222	0.05	0.103	0.63	NA	FALSE
B Cell	B cells/MD+	B cells/MD+/5-10+95-	222	-0.014	0.116	0.902	NA	FALSE
B Cell	B cells/MD+	B cells/MD+/10+95-	222	-0.057	0.111	0.607	NA	FALSE
B Cell	B cells/MD+	B cells/MD+/5+10+95-	222	-0.178	0.144	0.217	NA	FALSE
B Cell	B cells/MD+	B cells/MD+/5-10-21+95-	217	0.004	0.018	0.828	NA	FALSE
B Cell	B cells/MD+	B cells/MD+/10-21+95-	218	0.009	0.017	0.61	NA	FALSE
B Cell	B cells/MD+	B cells/MD+/5+10-21+95-	222	0.097	0.106	0.361	NA	FALSE
B Cell	B cells/MD+	B cells/MD+/5-21+95-	217	0.005	0.015	0.738	NA	FALSE
B Cell	B cells/MD+	B cells/MD+/21+95-	215	0.002	0.014	0.896	NA	FALSE
B Cell	B cells/MD+	B cells/MD+/5+21+95-	223	0.032	0.109	0.768	NA	FALSE
T Cell	DNT	DNT/27-57-95-127+244-RA+	196	-0.004	0.184	0.984	NA	FALSE
B Cell	B cells/MD+	B cells/MD+/5-10+21+95-	222	-0.007	0.121	0.956	NA	FALSE
B Cell	B cells/MD+	B cells/MD+/10+21+95-	222	-0.067	0.115	0.562	NA	FALSE
B Cell	B cells/MD+	B cells/MD+/5+10+21+95-	221	-0.162	0.151	0.287	NA	FALSE
B Cell	B cells/MD+	B cells/MD+/5-10-21-24+95-	223	0.046	0.179	0.797	NA	FALSE
B Cell	B cells/MD+	B cells/MD+/10-21-24+95-	223	0.059	0.18	0.745	NA	FALSE
B Cell	B cells/MD+	B cells/MD+/5-21-24+95-	222	-0.023	0.14	0.868	NA	FALSE
B Cell	B cells/MD+	B cells/MD+/21-24+95-	222	-0.015	0.137	0.915	NA	FALSE
T Cell	DNT	DNT/57-95-127+244-RA+	196	-0.02	0.195	0.919	NA	FALSE
B Cell	B cells/MD+	B cells/MD+/5-10+21-24+95-	217	0.04	0.164	0.807	NA	FALSE
B Cell	B cells/MD+	B cells/MD+/10+21-24+95-	219	-0.064	0.156	0.684	NA	FALSE
B Cell	B cells/MD+	B cells/MD+/5-10-24+95-	221	0.022	0.106	0.837	NA	FALSE
B Cell	B cells/MD+	B cells/MD+/10-24+95-	221	0.016	0.103	0.874	NA	FALSE
B Cell	B cells/MD+	B cells/MD+/5+10-24+95-	218	0.065	0.135	0.629	NA	FALSE
B Cell	B cells/MD+	B cells/MD+/5-24+95-	220	0.005	0.089	0.956	NA	FALSE
B Cell	B cells/MD+	B cells/MD+/24+95-	220	-0.015	0.085	0.861	NA	FALSE
B Cell	B cells/MD+	B cells/MD+/5+24+95-	221	0.004	0.128	0.978	NA	FALSE
T Cell	DNT	DNT/27+57-95-127+244-RA+	196	-0.023	0.202	0.909	NA	FALSE
B Cell	B cells/MD+	B cells/MD+/5-10+24+95-	222	-0.059	0.115	0.608	NA	FALSE
B Cell	B cells/MD+	B cells/MD+/10+24+95-	222	-0.092	0.11	0.407	NA	FALSE
B Cell	B cells/MD+	B cells/MD+/5+10+24+95-	220	-0.138	0.147	0.351	NA	FALSE
B Cell	B cells/MD+	B cells/MD+/5-10-21+24+95-	221	0.016	0.106	0.881	NA	FALSE
B Cell	B cells/MD+	B cells/MD+/10-21+24+95-	221	0.009	0.103	0.931	NA	FALSE
B Cell	B cells/MD+	B cells/MD+/5+10-21+24+95-	219	0.066	0.138	0.634	NA	FALSE
B Cell	B cells/MD+	B cells/MD+/5-21+24+95-	221	0.004	0.093	0.965	NA	FALSE
B Cell	B cells/MD+	B cells/MD+/21+24+95-	220	-0.022	0.088	0.8	NA	FALSE
B Cell	B cells/MD+	B cells/MD+/5+21+24+95-	223	-0.019	0.136	0.889	NA	FALSE
T Cell	CD8	CD8/27+28-127-	223	-0.304	0.177	0.087	NA	FALSE
T Cell	DNT	DNT/27-28+57-95-127+244-RA+	195	-0.077	0.218	0.724	NA	FALSE
B Cell	B cells/MD+	B cells/MD+/5-10+21+24+95-	222	-0.084	0.122	0.492	NA	FALSE
B Cell	B cells/MD+	B cells/MD+/10+21+24+95-	222	-0.114	0.116	0.328	NA	FALSE
B Cell	B cells/MD+	B cells/MD+/5+10+21+24+95-	219	-0.123	0.154	0.424	NA	FALSE
B Cell	B cells/A	B cells/A/10-21+24+27-95-	206	0.031	0.142	0.827	NA	FALSE
T Cell	DNT	DNT/28+57-95-127+244-RA+	196	-0.05	0.202	0.804	NA	FALSE
B Cell	B cells/MD+	B cells/MD+/5-10-24-27+95-	219	-0.121	0.156	0.441	NA	FALSE
B Cell	B cells/MD+	B cells/MD+/10-24-27+95-	219	0.001	0.14	0.996	NA	FALSE
B Cell	B cells/MD+	B cells/MD+/5-24-27+95-	219	-0.127	0.156	0.416	NA	FALSE
B Cell	B cells/MD+	B cells/MD+/24-27+95-	219	0.006	0.138	0.963	NA	FALSE
T Cell	DNT	DNT/27+28+57-95-127+244-RA+	196	-0.054	0.208	0.793	NA	FALSE
B Cell	B cells/MD+	B cells/MD+/5-10-21+24-27+95-	215	-0.162	0.145	0.267	NA	FALSE
B Cell	B cells/MD+	B cells/MD+/10-21+24-27+95-	218	0.003	0.139	0.983	NA	FALSE
B Cell	B cells/MD+	B cells/MD+/5-21+24-27+95-	215	-0.165	0.145	0.256	NA	FALSE
B Cell	B cells/MD+	B cells/MD+/21+24-27+95-	217	0.02	0.136	0.882	NA	FALSE
T Cell	DNT	DNT/28-31+57-95-127+244-RA+	194	0.212	0.263	0.42	NA	FALSE
B Cell	B cells/MD+	B cells/MD+/5-10-21-27+95-	215	-0.056	0.237	0.815	NA	FALSE
B Cell	B cells/MD+	B cells/MD+/10-21-27+95-	216	-0.05	0.232	0.831	NA	FALSE
B Cell	B cells/A	B cells/A/21+24+27-95-	207	0.076	0.138	0.581	NA	FALSE
B Cell	B cells/MD+	B cells/MD+/5-21-27+95-	216	-0.049	0.236	0.835	NA	FALSE
B Cell	B cells/MD+	B cells/MD+/21-27+95-	217	-0.05	0.23	0.827	NA	FALSE
B Cell	B cells/MD+	B cells/MD+/5-10-27+95-	223	-0.041	0.183	0.821	NA	FALSE
B Cell	B cells/MD+	B cells/MD+/10-27+95-	223	-0.015	0.173	0.932	NA	FALSE
B Cell	B cells/MD+	B cells/MD+/5-27+95-	223	-0.048	0.181	0.792	NA	FALSE
B Cell	B cells/MD+	B cells/MD+/27+95-	223	-0.017	0.17	0.922	NA	FALSE
B Cell	B cells/MD+	B cells/MD+/5+27+95-	209	0.081	0.154	0.6	NA	FALSE
T Cell	DNT	DNT/27-31+57-95-127+244-RA+	195	-0.135	0.232	0.563	NA	FALSE
B Cell	B cells/MD+	B cells/MD+/5-10-21+27+95-	223	-0.065	0.18	0.718	NA	FALSE
B Cell	B cells/MD+	B cells/MD+/10-21+27+95-	223	-0.028	0.17	0.868	NA	FALSE
B Cell	B cells/MD+	B cells/MD+/5-21+27+95-	223	-0.073	0.178	0.683	NA	FALSE
B Cell	B cells/MD+	B cells/MD+/21+27+95-	223	-0.032	0.167	0.85	NA	FALSE
T Cell	DNT	DNT/31+57-95-127+244-RA+	196	-0.177	0.234	0.452	NA	FALSE
T Cell	DNT	DNT/27+31+57-95-127+244-RA+	196	-0.175	0.241	0.468	NA	FALSE
B Cell	B cells/MD+	B cells/MD+/5-10-24+27+95-	222	-0.006	0.207	0.978	NA	FALSE
B Cell	B cells/MD+	B cells/MD+/10-24+27+95-	222	-0.016	0.205	0.937	NA	FALSE
B Cell	B cells/MD+	B cells/MD+/5-24+27+95-	222	-0.016	0.204	0.939	NA	FALSE
B Cell	B cells/MD+	B cells/MD+/24+27+95-	222	-0.026	0.2	0.896	NA	FALSE
T Cell	DNT	DNT/28+31+57-95-127+244-RA+	196	-0.219	0.235	0.354	NA	FALSE
B Cell	B cells/MD+	B cells/MD+/5-10-21+24+27+95-	222	-0.024	0.205	0.906	NA	FALSE
B Cell	B cells/MD+	B cells/MD+/10-21+24+27+95-	222	-0.033	0.202	0.873	NA	FALSE
B Cell	B cells/MD+	B cells/MD+/5-21+24+27+95-	222	-0.04	0.201	0.842	NA	FALSE
B Cell	B cells/MD+	B cells/MD+/21+24+27+95-	222	-0.047	0.198	0.811	NA	FALSE
B Cell	B cells/A	B cells/A/5-10-21-24-95-	215	-0.039	0.152	0.797	NA	FALSE
B Cell	B cells/MD+	B cells/MD+/10-21-24-27-38+95-	221	-0.178	0.144	0.218	NA	FALSE
B Cell	B cells/MD+	B cells/MD+/5-21-24-27-38+95-	219	-0.194	0.14	0.168	NA	FALSE
B Cell	B cells/MD+	B cells/MD+/21-24-27-38+95-	220	-0.177	0.14	0.208	NA	FALSE
B Cell	B cells/MD+	B cells/MD+/5-10-24-27-38+95-	215	-0.107	0.043	0.013	NA	FALSE
T Cell	CD8	CD8/27-127-	223	-0.207	0.174	0.235	NA	FALSE
T Cell	DNT	DNT/28-31-95-127+244-RA+	194	0.35	0.232	0.134	NA	FALSE
B Cell	B cells/MD+	B cells/MD+/10-24-27-38+95-	214	-0.1	0.039	0.011	NA	FALSE
B Cell	B cells/MD+	B cells/MD+/5+10-24-27-38+95-	222	0.031	0.116	0.791	NA	FALSE
B Cell	B cells/MD+	B cells/MD+/5-24-27-38+95-	214	-0.105	0.039	8.23e-03	NA	FALSE
B Cell	B cells/A	B cells/A/10-21-24-95-	217	-0.017	0.151	0.909	NA	FALSE
B Cell	B cells/MD+	B cells/MD+/24-27-38+95-	215	-0.095	0.039	0.015	NA	FALSE
B Cell	B cells/MD+	B cells/MD+/5+24-27-38+95-	221	-0.019	0.113	0.865	NA	FALSE
B Cell	B cells/MD+	B cells/MD+/5-10+24-27-38+95-	220	0.028	0.186	0.881	NA	FALSE
B Cell	B cells/MD+	B cells/MD+/10+24-27-38+95-	221	-0.037	0.175	0.832	NA	FALSE
B Cell	B cells/MD+	B cells/MD+/10-21+24-27-38+95-	215	-0.097	0.046	0.035	NA	FALSE
T Cell	DNT	DNT/27+28-31-95-127+244-RA+	193	0.36	0.25	0.153	NA	FALSE
B Cell	B cells/MD+	B cells/MD+/5-21+24-27-38+95-	214	-0.101	0.044	0.022	NA	FALSE
B Cell	B cells/MD+	B cells/MD+/21+24-27-38+95-	215	-0.093	0.044	0.037	NA	FALSE
B Cell	B cells/MD+	B cells/MD+/5+21+24-27-38+95-	221	-0.024	0.119	0.842	NA	FALSE
B Cell	B cells/MD+	B cells/MD+/10+21+24-27-38+95-	221	-0.044	0.177	0.804	NA	FALSE
B Cell	B cells/MD+	B cells/MD+/5-10-21-27-38+95-	220	-0.197	0.137	0.152	NA	FALSE
B Cell	B cells/MD+	B cells/MD+/10-21-27-38+95-	220	-0.191	0.134	0.155	NA	FALSE
B Cell	B cells/MD+	B cells/MD+/5-21-27-38+95-	221	-0.166	0.131	0.206	NA	FALSE
B Cell	B cells/MD+	B cells/MD+/21-27-38+95-	220	-0.174	0.124	0.16	NA	FALSE
T Cell	DNT	DNT/27-31-95-127+244-RA+	196	0.129	0.183	0.482	NA	FALSE
B Cell	B cells/MD+	B cells/MD+/5-10+21-27-38+95-	216	-0.026	0.163	0.874	NA	FALSE
B Cell	B cells/MD+	B cells/MD+/10+21-27-38+95-	218	-0.112	0.159	0.482	NA	FALSE
B Cell	B cells/MD+	B cells/MD+/5-10-27-38+95-	216	-0.101	0.04	0.012	NA	FALSE
B Cell	B cells/A	B cells/A/5-21-24-95-	217	-0.118	0.153	0.44	NA	FALSE
B Cell	B cells/MD+	B cells/MD+/10-27-38+95-	216	-0.097	0.037	9.89e-03	NA	FALSE
B Cell	B cells/MD+	B cells/MD+/5+10-27-38+95-	222	-0.004	0.114	0.969	NA	FALSE
B Cell	B cells/MD+	B cells/MD+/5-27-38+95-	215	-0.093	0.036	0.011	NA	FALSE
B Cell	B cells/MD+	B cells/MD+/27-38+95-	217	-0.095	0.037	0.011	NA	FALSE
T Cell	DNT	DNT/31-95-127+244-RA+	196	0.184	0.191	0.335	NA	FALSE
B Cell	B cells/MD+	B cells/MD+/5+27-38+95-	221	-0.062	0.111	0.577	NA	FALSE
B Cell	B cells/MD+	B cells/MD+/5-10+27-38+95-	222	-0.01	0.126	0.939	NA	FALSE
B Cell	B cells/MD+	B cells/MD+/10+27-38+95-	221	-0.068	0.118	0.564	NA	FALSE
B Cell	B cells/MD+	B cells/MD+/5+10+27-38+95-	219	-0.227	0.145	0.119	NA	FALSE
B Cell	B cells/MD+	B cells/MD+/5-10-21+27-38+95-	217	-0.104	0.044	0.019	NA	FALSE
B Cell	B cells/MD+	B cells/MD+/10-21+27-38+95-	216	-0.104	0.041	0.013	NA	FALSE
B Cell	B cells/A	B cells/A/21-24-95-	219	-0.113	0.154	0.463	NA	FALSE
B Cell	B cells/MD+	B cells/MD+/5+10-21+27-38+95-	221	-0.025	0.116	0.832	NA	FALSE
B Cell	B cells/MD+	B cells/MD+/5-21+27-38+95-	216	-0.098	0.042	0.019	NA	FALSE
B Cell	B cells/MD+	B cells/MD+/21+27-38+95-	217	-0.098	0.042	0.02	NA	FALSE
T Cell	DNT	DNT/27+31-95-127+244-RA+	195	0.185	0.198	0.35	NA	FALSE
B Cell	B cells/MD+	B cells/MD+/5+21+27-38+95-	221	-0.078	0.116	0.503	NA	FALSE
B Cell	B cells/MD+	B cells/MD+/5-10+21+27-38+95-	222	0.004	0.132	0.976	NA	FALSE
B Cell	B cells/MD+	B cells/MD+/10+21+27-38+95-	220	-0.081	0.122	0.506	NA	FALSE
B Cell	B cells/MD+	B cells/MD+/5+10+21+27-38+95-	217	-0.122	0.156	0.436	NA	FALSE
B Cell	B cells/MD+	B cells/MD+/5-21-24+27-38+95-	219	-0.042	0.14	0.767	NA	FALSE
B Cell	B cells/MD+	B cells/MD+/21-24+27-38+95-	220	-0.141	0.137	0.306	NA	FALSE
B Cell	B cells/MD+	B cells/MD+/10+21-24+27-38+95-	216	-0.101	0.157	0.521	NA	FALSE
B Cell	B cells/MD+	B cells/MD+/5-10-24+27-38+95-	222	-0.044	0.114	0.702	NA	FALSE
B Cell	B cells/MD+	B cells/MD+/10-24+27-38+95-	223	-0.043	0.112	0.699	NA	FALSE
B Cell	B cells/MD+	B cells/MD+/5+10-24+27-38+95-	218	-0.081	0.153	0.598	NA	FALSE
B Cell	B cells/MD+	B cells/MD+/5-24+27-38+95-	221	-0.068	0.096	0.483	NA	FALSE
B Cell	B cells/MD+	B cells/MD+/24+27-38+95-	222	-0.083	0.095	0.382	NA	FALSE
B Cell	B cells/MD+	B cells/MD+/5+24+27-38+95-	221	-0.112	0.136	0.412	NA	FALSE
B Cell	B cells/MD+	B cells/MD+/5-10+24+27-38+95-	221	-0.06	0.124	0.629	NA	FALSE
B Cell	B cells/MD+	B cells/MD+/10+24+27-38+95-	221	-0.097	0.119	0.418	NA	FALSE
B Cell	B cells/MD+	B cells/MD+/5+10+24+27-38+95-	217	-0.172	0.147	0.243	NA	FALSE
T Cell	DNT	DNT/27-28+31-95-127+244-RA+	194	0.079	0.202	0.698	NA	FALSE
B Cell	B cells/MD+	B cells/MD+/10-21+24+27-38+95-	223	-0.055	0.115	0.635	NA	FALSE
B Cell	B cells/MD+	B cells/MD+/5-21+24+27-38+95-	222	-0.077	0.105	0.464	NA	FALSE
B Cell	B cells/MD+	B cells/MD+/21+24+27-38+95-	222	-0.098	0.101	0.333	NA	FALSE
B Cell	B cells/MD+	B cells/MD+/5+21+24+27-38+95-	222	-0.125	0.147	0.397	NA	FALSE
B Cell	B cells/MD+	B cells/MD+/10+21+24+27-38+95-	219	-0.138	0.123	0.265	NA	FALSE
B Cell	B cells/MD+	B cells/MD+/5-10-21-24-38+95-	219	-0.202	0.141	0.153	NA	FALSE
B Cell	B cells/MD+	B cells/MD+/10-21-24-38+95-	221	-0.183	0.141	0.196	NA	FALSE
B Cell	B cells/MD+	B cells/MD+/5-21-24-38+95-	220	-0.19	0.14	0.177	NA	FALSE
T Cell	DNT	DNT/28+31-95-127+244-RA+	195	0.157	0.199	0.431	NA	FALSE
B Cell	B cells/MD+	B cells/MD+/21-24-38+95-	222	-0.168	0.142	0.235	NA	FALSE
B Cell	B cells/MD+	B cells/MD+/5-10-24-38+95-	215	-0.106	0.041	0.011	NA	FALSE
B Cell	B cells/MD+	B cells/MD+/10-24-38+95-	216	-0.091	0.041	0.027	NA	FALSE
B Cell	B cells/MD+	B cells/MD+/5+10-24-38+95-	221	0.025	0.107	0.817	NA	FALSE
B Cell	B cells/MD+	B cells/MD+/5-24-38+95-	214	-0.105	0.039	7.32e-03	NA	FALSE
T Cell	DNT	DNT/27+28+31-95-127+244-RA+	196	0.174	0.211	0.411	NA	FALSE
B Cell	B cells/MD+	B cells/MD+/24-38+95-	215	-0.093	0.038	0.015	NA	FALSE
B Cell	B cells/MD+	B cells/MD+/5+24-38+95-	221	-0.002	0.109	0.985	NA	FALSE
B Cell	B cells/MD+	B cells/MD+/5-10+24-38+95-	221	0.037	0.188	0.845	NA	FALSE
B Cell	B cells/MD+	B cells/MD+/10+24-38+95-	221	-0.029	0.173	0.865	NA	FALSE
B Cell	B cells/MD+	B cells/MD+/5-10-21+24-38+95-	215	-0.102	0.046	0.027	NA	FALSE
B Cell	B cells/MD+	B cells/MD+/10-21+24-38+95-	215	-0.093	0.044	0.038	NA	FALSE
B Cell	B cells/MD+	B cells/MD+/5+10-21+24-38+95-	221	0.026	0.113	0.816	NA	FALSE
B Cell	B cells/MD+	B cells/MD+/5-21+24-38+95-	215	-0.096	0.045	0.033	NA	FALSE
T Cell	DNT	DNT/27-28-95-127+244-RA+	194	0.211	0.193	0.276	NA	FALSE
B Cell	B cells/MD+	B cells/MD+/21+24-38+95-	215	-0.089	0.043	0.04	NA	FALSE
B Cell	B cells/MD+	B cells/MD+/5+21+24-38+95-	220	-0.024	0.112	0.831	NA	FALSE
B Cell	B cells/A	B cells/A/5-10-24-95-	221	0.123	0.107	0.252	NA	FALSE
B Cell	B cells/MD+	B cells/MD+/5-10+21+24-38+95-	220	0.054	0.191	0.777	NA	FALSE
B Cell	B cells/MD+	B cells/MD+/10+21+24-38+95-	221	-0.034	0.176	0.846	NA	FALSE
B Cell	B cells/MD+	B cells/MD+/5-10-21-38+95-	220	-0.201	0.134	0.136	NA	FALSE
B Cell	B cells/MD+	B cells/MD+/10-21-38+95-	220	-0.197	0.132	0.136	NA	FALSE
B Cell	B cells/MD+	B cells/MD+/5-21-38+95-	222	-0.16	0.13	0.22	NA	FALSE
T Cell	CD8	CD8/127-	223	-0.158	0.113	0.164	NA	FALSE
T Cell	DNT	DNT/28-95-127+244-RA+	196	0.329	0.227	0.149	NA	FALSE
B Cell	B cells/MD+	B cells/MD+/21-38+95-	222	-0.159	0.127	0.21	NA	FALSE
B Cell	B cells/MD+	B cells/MD+/5-10+21-38+95-	217	-0.023	0.162	0.888	NA	FALSE
B Cell	B cells/A	B cells/A/10-24-95-	221	-0.266	0.089	3.03e-03	NA	FALSE
B Cell	B cells/MD+	B cells/MD+/10+21-38+95-	219	-0.112	0.158	0.481	NA	FALSE
B Cell	B cells/MD+	B cells/MD+/5-10-38+95-	216	-0.103	0.036	4.41e-03	NA	FALSE
B Cell	B cells/MD+	B cells/MD+/10-38+95-	217	-0.093	0.034	7.46e-03	NA	FALSE
B Cell	B cells/MD+	B cells/MD+/5+10-38+95-	222	0.004	0.111	0.969	NA	FALSE
B Cell	B cells/MD+	B cells/MD+/5-38+95-	216	-0.091	0.034	7.54e-03	NA	FALSE
T Cell	DNT	DNT/27+28-95-127+244-RA+	194	0.313	0.24	0.193	NA	FALSE
B Cell	B cells/MD+	B cells/MD+/38+95-	217	-0.092	0.032	5.18e-03	NA	FALSE
B Cell	B cells/MD+	B cells/MD+/5+38+95-	222	-0.048	0.109	0.663	NA	FALSE
B Cell	B cells/MD+	B cells/MD+/5-10+38+95-	222	-0.017	0.124	0.894	NA	FALSE
B Cell	B cells/MD+	B cells/MD+/10+38+95-	221	-0.07	0.117	0.547	NA	FALSE
B Cell	B cells/A	B cells/A/5+10-24-95-	218	-0.636	0.186	7.49e-04	NA	FALSE
B Cell	B cells/MD+	B cells/MD+/5+10+38+95-	220	-0.218	0.146	0.136	NA	FALSE
B Cell	B cells/MD+	B cells/MD+/5-10-21+38+95-	217	-0.106	0.041	9.8e-03	NA	FALSE
B Cell	B cells/MD+	B cells/MD+/10-21+38+95-	218	-0.101	0.041	0.014	NA	FALSE
B Cell	B cells/MD+	B cells/MD+/5+10-21+38+95-	221	-0.011	0.112	0.923	NA	FALSE
B Cell	B cells/MD+	B cells/MD+/5-21+38+95-	216	-0.101	0.038	9.15e-03	NA	FALSE
T Cell	DNT	DNT/27-95-127+244-RA+	196	-0.004	0.184	0.982	NA	FALSE
B Cell	B cells/MD+	B cells/MD+/21+38+95-	217	-0.101	0.038	8.83e-03	NA	FALSE
B Cell	B cells/MD+	B cells/MD+/5+21+38+95-	221	-0.065	0.112	0.562	NA	FALSE
B Cell	B cells/MD+	B cells/MD+/5-10+21+38+95-	222	-0.005	0.13	0.97	NA	FALSE
B Cell	B cells/MD+	B cells/MD+/10+21+38+95-	220	-0.084	0.12	0.483	NA	FALSE
B Cell	B cells/MD+	B cells/MD+/5+10+21+38+95-	218	-0.108	0.156	0.49	NA	FALSE
B Cell	B cells/A	B cells/A/5-24-95-	221	0.09	0.102	0.377	NA	FALSE
B Cell	B cells/MD+	B cells/MD+/10-21-24+38+95-	212	-0.04	0.169	0.812	NA	FALSE
B Cell	B cells/MD+	B cells/MD+/5-21-24+38+95-	220	-0.031	0.14	0.826	NA	FALSE
T Cell	DNT	DNT/95-127+244-RA+	196	-0.02	0.195	0.919	NA	FALSE
B Cell	B cells/MD+	B cells/MD+/21-24+38+95-	220	-0.03	0.139	0.83	NA	FALSE
B Cell	B cells/MD+	B cells/MD+/5-10+21-24+38+95-	216	0.015	0.163	0.928	NA	FALSE
B Cell	B cells/MD+	B cells/MD+/10+21-24+38+95-	217	-0.089	0.156	0.57	NA	FALSE
B Cell	B cells/MD+	B cells/MD+/5-10-24+38+95-	223	-0.037	0.109	0.737	NA	FALSE
B Cell	B cells/A	B cells/A/24-95-	223	-0.258	0.09	4.56e-03	NA	FALSE
B Cell	B cells/MD+	B cells/MD+/10-24+38+95-	223	-0.041	0.106	0.701	NA	FALSE
B Cell	B cells/MD+	B cells/MD+/5+10-24+38+95-	218	-0.073	0.149	0.623	NA	FALSE
B Cell	B cells/MD+	B cells/MD+/5-24+38+95-	220	-0.071	0.088	0.423	NA	FALSE
T Cell	DNT	DNT/27+95-127+244-RA+	196	-0.023	0.202	0.909	NA	FALSE
B Cell	B cells/MD+	B cells/MD+/24+38+95-	221	-0.087	0.088	0.326	NA	FALSE
B Cell	B cells/MD+	B cells/MD+/5+24+38+95-	222	-0.106	0.137	0.44	NA	FALSE
B Cell	B cells/MD+	B cells/MD+/5-10+24+38+95-	222	-0.064	0.124	0.606	NA	FALSE
B Cell	B cells/MD+	B cells/MD+/10+24+38+95-	221	-0.107	0.117	0.362	NA	FALSE
B Cell	B cells/MD+	B cells/MD+/5+10+24+38+95-	218	-0.179	0.147	0.226	NA	FALSE
B Cell	B cells/MD+	B cells/MD+/5-10-21+24+38+95-	223	-0.045	0.111	0.683	NA	FALSE
B Cell	B cells/MD+	B cells/MD+/10-21+24+38+95-	222	-0.057	0.107	0.595	NA	FALSE
B Cell	B cells/A	B cells/A/5+24-95-	218	-0.674	0.185	3.47e-04	NA	FALSE
B Cell	B cells/MD+	B cells/MD+/5+10-21+24+38+95-	218	-0.083	0.151	0.586	NA	FALSE
B Cell	B cells/MD+	B cells/MD+/5-21+24+38+95-	222	-0.076	0.098	0.44	NA	FALSE
T Cell	DNT	DNT/27-28+95-127+244-RA+	195	-0.077	0.218	0.723	NA	FALSE
B Cell	B cells/MD+	B cells/MD+/21+24+38+95-	222	-0.095	0.095	0.318	NA	FALSE
B Cell	B cells/MD+	B cells/MD+/5+21+24+38+95-	221	-0.135	0.141	0.338	NA	FALSE
B Cell	B cells/MD+	B cells/MD+/5-10+21+24+38+95-	222	-0.094	0.133	0.48	NA	FALSE
B Cell	B cells/MD+	B cells/MD+/10+21+24+38+95-	221	-0.137	0.126	0.28	NA	FALSE
B Cell	B cells/MD+	B cells/MD+/5+10+21+24+38+95-	218	-0.151	0.158	0.343	NA	FALSE
T Cell	CD4	CD4/27-57+127-RA-	221	-0.55	0.431	0.204	NA	FALSE
B Cell	B cells/MD+	B cells/MD+/10-24-27+38+95-	216	0.026	0.119	0.825	NA	FALSE
B Cell	B cells/MD+	B cells/MD+/24-27+38+95-	217	0.052	0.119	0.666	NA	FALSE
T Cell	DNT	DNT/28+95-127+244-RA+	196	-0.05	0.202	0.804	NA	FALSE
B Cell	B cells/MD+	B cells/MD+/10-21+24-27+38+95-	213	0.01	0.115	0.93	NA	FALSE
B Cell	B cells/MD+	B cells/MD+/21+24-27+38+95-	213	0.039	0.116	0.738	NA	FALSE
T Cell	DNT	DNT/27+28+95-127+244-RA+	196	-0.055	0.208	0.793	NA	FALSE
B Cell	B cells/MD+	B cells/MD+/5-10-27+38+95-	219	-0.121	0.162	0.457	NA	FALSE
B Cell	B cells/MD+	B cells/MD+/10-27+38+95-	217	-0.058	0.137	0.675	NA	FALSE
B Cell	B cells/MD+	B cells/MD+/5-27+38+95-	220	-0.136	0.159	0.395	NA	FALSE
B Cell	B cells/MD+	B cells/MD+/27+38+95-	217	-0.065	0.131	0.622	NA	FALSE
B Cell	B cells/A	B cells/A/5-10-21+24-95-	220	0.192	0.113	0.091	NA	FALSE
B Cell	B cells/MD+	B cells/MD+/5-10-21+27+38+95-	217	-0.168	0.159	0.293	NA	FALSE
B Cell	B cells/MD+	B cells/MD+/10-21+27+38+95-	215	-0.093	0.134	0.485	NA	FALSE
T Cell	DNT	DNT/28-31+95-127+244-RA+	194	0.21	0.262	0.424	NA	FALSE
B Cell	B cells/MD+	B cells/MD+/5-21+27+38+95-	217	-0.188	0.156	0.229	NA	FALSE
B Cell	B cells/MD+	B cells/MD+/21+27+38+95-	215	-0.101	0.13	0.439	NA	FALSE
B Cell	B cells/A	B cells/A/10-21+24-95-	220	-0.28	0.098	4.61e-03	NA	FALSE
T Cell	DNT	DNT/27+28-31+95-127+244-RA+	191	0.21	0.282	0.458	NA	FALSE
B Cell	B cells/MD+	B cells/MD+/5-10-24+27+38+95-	213	-0.128	0.208	0.54	NA	FALSE
B Cell	B cells/MD+	B cells/MD+/10-24+27+38+95-	213	-0.118	0.201	0.559	NA	FALSE
B Cell	B cells/A	B cells/A/5+10-21+24-95-	218	-0.654	0.19	6.77e-04	NA	FALSE
B Cell	B cells/MD+	B cells/MD+/5-24+27+38+95-	213	-0.163	0.197	0.408	NA	FALSE
B Cell	B cells/MD+	B cells/MD+/24+27+38+95-	213	-0.166	0.189	0.382	NA	FALSE
T Cell	DNT	DNT/27-31+95-127+244-RA+	195	-0.137	0.231	0.554	NA	FALSE
B Cell	B cells/MD+	B cells/MD+/10-21+24+27+38+95-	212	-0.149	0.201	0.46	NA	FALSE
B Cell	B cells/MD+	B cells/MD+/21+24+27+38+95-	212	-0.202	0.19	0.288	NA	FALSE
B Cell	B cells/A	B cells/A/5-21+24-95-	220	0.207	0.109	0.059	NA	FALSE
B Cell	B cells/MD+	B cells/MD+/5-10-21-24-27-38-	221	0.059	0.135	0.665	NA	FALSE
B Cell	B cells/MD+	B cells/MD+/10-21-24-27-38-	221	0.06	0.136	0.659	NA	FALSE
T Cell	DNT	DNT/31+95-127+244-RA+	196	-0.177	0.234	0.452	NA	FALSE
B Cell	B cells/MD+	B cells/MD+/5-21-24-27-38-	221	0.054	0.135	0.688	NA	FALSE
B Cell	B cells/MD+	B cells/MD+/21-24-27-38-	221	0.056	0.135	0.68	NA	FALSE
B Cell	B cells/A	B cells/A/21+24-95-	222	-0.238	0.099	0.017	NA	FALSE
B Cell	B cells/MD+	B cells/MD+/5-10-24-27-38-	223	0.261	0.089	3.58e-03	NA	FALSE
B Cell	B cells/MD+	B cells/MD+/10-24-27-38-	223	0.262	0.087	3.07e-03	NA	FALSE
T Cell	DNT	DNT/27+31+95-127+244-RA+	196	-0.175	0.241	0.468	NA	FALSE
B Cell	B cells/MD+	B cells/MD+/5+10-24-27-38-	212	0.366	0.132	6.2e-03	NA	FALSE
B Cell	B cells/MD+	B cells/MD+/5-24-27-38-	223	0.261	0.089	3.73e-03	NA	FALSE
B Cell	B cells/MD+	B cells/MD+/24-27-38-	223	0.262	0.088	3.19e-03	NA	FALSE
B Cell	B cells/MD+	B cells/MD+/5+24-27-38-	212	0.363	0.133	6.84e-03	NA	FALSE
B Cell	B cells/A	B cells/A/5+21+24-95-	218	-0.668	0.19	5.26e-04	NA	FALSE
B Cell	B cells/MD+	B cells/MD+/5-10-21+24-27-38-	223	0.285	0.089	1.54e-03	NA	FALSE
B Cell	B cells/MD+	B cells/MD+/10-21+24-27-38-	223	0.286	0.087	1.24e-03	NA	FALSE
T Cell	DNT	DNT/27-28+31+95-127+244-RA+	190	-0.297	0.262	0.259	NA	FALSE
B Cell	B cells/MD+	B cells/MD+/5+10-21+24-27-38-	208	0.335	0.138	0.016	NA	FALSE
B Cell	B cells/MD+	B cells/MD+/5-21+24-27-38-	223	0.285	0.089	1.56e-03	NA	FALSE
B Cell	B cells/MD+	B cells/MD+/21+24-27-38-	223	0.286	0.088	1.26e-03	NA	FALSE
B Cell	B cells/MD+	B cells/MD+/5+21+24-27-38-	208	0.329	0.137	0.017	NA	FALSE
B Cell	B cells/MD+	B cells/MD+/5-10-21-27-38-	222	0.074	0.135	0.583	NA	FALSE
B Cell	B cells/MD+	B cells/MD+/10-21-27-38-	222	0.073	0.136	0.592	NA	FALSE
T Cell	DNT	DNT/28+31+95-127+244-RA+	196	-0.219	0.235	0.354	NA	FALSE
B Cell	B cells/MD+	B cells/MD+/5-21-27-38-	222	0.073	0.135	0.592	NA	FALSE
B Cell	B cells/MD+	B cells/MD+/21-27-38-	222	0.071	0.136	0.601	NA	FALSE
B Cell	B cells/MD+	B cells/MD+/5-10-27-38-	223	0.26	0.083	2.01e-03	NA	FALSE
B Cell	B cells/MD+	B cells/MD+/10-27-38-	223	0.263	0.082	1.6e-03	NA	FALSE
T Cell	CD4	CD4/57+127-RA-	223	-0.364	0.354	0.306	NA	FALSE
B Cell	B cells/MD+	B cells/MD+/5+10-27-38-	211	0.43	0.125	6.75e-04	NA	FALSE
B Cell	B cells/MD+	B cells/MD+/5-27-38-	223	0.26	0.083	2.03e-03	NA	FALSE
B Cell	B cells/MD+	B cells/MD+/27-38-	223	0.263	0.083	1.64e-03	NA	FALSE
B Cell	B cells/MD+	B cells/MD+/5+27-38-	212	0.421	0.126	9.96e-04	NA	FALSE
B Cell	B cells/MD+	B cells/MD+/5-10-21+27-38-	223	0.279	0.081	7.37e-04	NA	FALSE
B Cell	B cells/MD+	B cells/MD+/10-21+27-38-	223	0.283	0.08	5.09e-04	NA	FALSE
B Cell	B cells/MD+	B cells/MD+/5+10-21+27-38-	206	0.419	0.124	8.41e-04	NA	FALSE
T Cell	DNT	DNT/27+28+31+95-127+244-RA+	196	-0.217	0.239	0.365	NA	FALSE
B Cell	B cells/MD+	B cells/MD+/5-21+27-38-	223	0.279	0.081	7.42e-04	NA	FALSE
B Cell	B cells/MD+	B cells/MD+/21+27-38-	223	0.283	0.08	5.28e-04	NA	FALSE
B Cell	B cells/MD+	B cells/MD+/5+21+27-38-	207	0.406	0.123	1.18e-03	NA	FALSE
B Cell	B cells/MD+	B cells/MD+/5-10-21-24+27-38-	219	0.082	0.203	0.685	NA	FALSE
B Cell	B cells/MD+	B cells/MD+/10-21-24+27-38-	219	0.077	0.203	0.706	NA	FALSE
B Cell	B cells/MD+	B cells/MD+/5-21-24+27-38-	219	0.092	0.203	0.649	NA	FALSE
B Cell	B cells/A	B cells/A/5-10-21-95-	219	-0.034	0.139	0.808	NA	FALSE
B Cell	B cells/MD+	B cells/MD+/21-24+27-38-	218	0.079	0.198	0.691	NA	FALSE
B Cell	B cells/MD+	B cells/MD+/5-10-24+27-38-	222	0.264	0.14	0.061	NA	FALSE
B Cell	B cells/MD+	B cells/MD+/10-24+27-38-	222	0.279	0.14	0.047	NA	FALSE
T Cell	CD8	CD8/27+127-	223	-0.043	0.112	0.701	NA	FALSE
B Cell	B cells/MD+	B cells/MD+/5-24+27-38-	222	0.263	0.14	0.061	NA	FALSE
B Cell	B cells/MD+	B cells/MD+/24+27-38-	222	0.277	0.139	0.048	NA	FALSE
B Cell	B cells/A	B cells/A/10-21-95-	220	-0.022	0.139	0.872	NA	FALSE
B Cell	B cells/MD+	B cells/MD+/5-10-21+24+27-38-	222	0.279	0.139	0.047	NA	FALSE
B Cell	B cells/MD+	B cells/MD+/10-21+24+27-38-	222	0.296	0.139	0.034	NA	FALSE
B Cell	B cells/MD+	B cells/MD+/5-21+24+27-38-	222	0.276	0.139	0.048	NA	FALSE
B Cell	B cells/MD+	B cells/MD+/21+24+27-38-	222	0.293	0.139	0.035	NA	FALSE
B Cell	B cells/MD+	B cells/MD+/5-10-21-24-38-	222	0.049	0.139	0.723	NA	FALSE
B Cell	B cells/MD+	B cells/MD+/10-21-24-38-	222	0.055	0.139	0.695	NA	FALSE
B Cell	B cells/MD+	B cells/MD+/5-21-24-38-	222	0.045	0.139	0.748	NA	FALSE
B Cell	B cells/MD+	B cells/MD+/21-24-38-	222	0.051	0.139	0.716	NA	FALSE
B Cell	B cells/A	B cells/A/5-21-95-	220	-0.095	0.137	0.49	NA	FALSE
B Cell	B cells/MD+	B cells/MD+/5-10-24-38-	223	0.239	0.089	7.75e-03	NA	FALSE
B Cell	B cells/MD+	B cells/MD+/10-24-38-	223	0.244	0.088	6.16e-03	NA	FALSE
B Cell	B cells/MD+	B cells/MD+/5+10-24-38-	210	0.356	0.121	3.62e-03	NA	FALSE
B Cell	B cells/MD+	B cells/MD+/5-24-38-	223	0.238	0.089	8.19e-03	NA	FALSE
B Cell	B cells/MD+	B cells/MD+/24-38-	223	0.243	0.088	6.44e-03	NA	FALSE
B Cell	B cells/MD+	B cells/MD+/5+24-38-	210	0.361	0.121	3.16e-03	NA	FALSE
B Cell	B cells/A	B cells/A/21-95-	221	-0.108	0.137	0.429	NA	FALSE
B Cell	B cells/MD+	B cells/MD+/5-10-21+24-38-	223	0.263	0.088	3.17e-03	NA	FALSE
B Cell	B cells/MD+	B cells/MD+/10-21+24-38-	222	0.264	0.085	2.29e-03	NA	FALSE
B Cell	B cells/MD+	B cells/MD+/5+10-21+24-38-	208	0.333	0.127	9.29e-03	NA	FALSE
B Cell	B cells/MD+	B cells/MD+/5-21+24-38-	223	0.262	0.088	3.31e-03	NA	FALSE
B Cell	B cells/MD+	B cells/MD+/21+24-38-	222	0.264	0.086	2.36e-03	NA	FALSE
B Cell	B cells/MD+	B cells/MD+/5+21+24-38-	207	0.336	0.123	6.99e-03	NA	FALSE
B Cell	B cells/MD+	B cells/MD+/5-10-21-38-	222	0.058	0.139	0.677	NA	FALSE
B Cell	B cells/MD+	B cells/MD+/10-21-38-	222	0.059	0.14	0.672	NA	FALSE
B Cell	B cells/MD+	B cells/MD+/5-21-38-	222	0.057	0.139	0.68	NA	FALSE
B Cell	B cells/MD+	B cells/MD+/21-38-	222	0.059	0.14	0.673	NA	FALSE
B Cell	B cells/MD+	B cells/MD+/5-10-38-	223	0.212	0.087	0.016	NA	FALSE
B Cell	B cells/MD+	B cells/MD+/10-38-	223	0.219	0.087	0.013	NA	FALSE
B Cell	B cells/MD+	B cells/MD+/5+10-38-	212	0.404	0.127	1.63e-03	NA	FALSE
B Cell	B cells/MD+	B cells/MD+/5-38-	223	0.212	0.087	0.016	NA	FALSE
B Cell	B cells/MD+	B cells/MD+/38-	223	0.219	0.088	0.013	NA	FALSE
B Cell	B cells/MD+	B cells/MD+/5+38-	213	0.406	0.126	1.49e-03	NA	FALSE
B Cell	B cells/MD+	B cells/MD+/5-10-21+38-	222	0.222	0.082	7.18e-03	NA	FALSE
B Cell	B cells/MD+	B cells/MD+/10-21+38-	222	0.23	0.082	5.48e-03	NA	FALSE
B Cell	B cells/MD+	B cells/MD+/5+10-21+38-	211	0.405	0.127	1.7e-03	NA	FALSE
B Cell	B cells/MD+	B cells/MD+/5-21+38-	222	0.222	0.082	7.44e-03	NA	FALSE
B Cell	B cells/MD+	B cells/MD+/21+38-	222	0.23	0.082	5.64e-03	NA	FALSE
B Cell	B cells/MD+	B cells/MD+/5+21+38-	212	0.403	0.124	1.34e-03	NA	FALSE
B Cell	B cells/MD+	B cells/MD+/5-10-21-24+38-	220	0.028	0.21	0.893	NA	FALSE
B Cell	B cells/MD+	B cells/MD+/10-21-24+38-	220	0.032	0.21	0.88	NA	FALSE
B Cell	B cells/MD+	B cells/MD+/5-21-24+38-	220	0.037	0.21	0.862	NA	FALSE
B Cell	B cells/MD+	B cells/MD+/21-24+38-	220	0.036	0.209	0.862	NA	FALSE
B Cell	B cells/MD+	B cells/MD+/5-10-24+38-	222	0.166	0.158	0.294	NA	FALSE
B Cell	B cells/MD+	B cells/MD+/10-24+38-	222	0.178	0.158	0.262	NA	FALSE
B Cell	B cells/MD+	B cells/MD+/5-24+38-	222	0.167	0.157	0.289	NA	FALSE
B Cell	B cells/A	B cells/A/5-10-95-	220	0.025	0.086	0.768	NA	FALSE
B Cell	B cells/MD+	B cells/MD+/24+38-	222	0.179	0.157	0.256	NA	FALSE
B Cell	B cells/MD+	B cells/MD+/5-10-21+24+38-	222	0.167	0.154	0.28	NA	FALSE
B Cell	B cells/MD+	B cells/MD+/10-21+24+38-	222	0.179	0.155	0.25	NA	FALSE
T Cell	CD8	CD8/27-28+127-	223	0.204	0.13	0.118	NA	FALSE
B Cell	B cells/MD+	B cells/MD+/5-21+24+38-	222	0.167	0.154	0.279	NA	FALSE
B Cell	B cells/MD+	B cells/MD+/21+24+38-	222	0.179	0.154	0.246	NA	FALSE
B Cell	B cells/A	B cells/A/10-95-	221	-0.177	0.059	3.08e-03	NA	FALSE
B Cell	B cells/A	B cells/A/5+10-95-	220	-0.623	0.183	7.65e-04	NA	FALSE
B Cell	B cells/MD+	B cells/MD+/5-10-24-27+38-	221	-0.13	0.213	0.542	NA	FALSE
B Cell	B cells/MD+	B cells/MD+/10-24-27+38-	221	-0.017	0.207	0.934	NA	FALSE
B Cell	B cells/MD+	B cells/MD+/5-24-27+38-	221	-0.141	0.212	0.506	NA	FALSE
B Cell	B cells/MD+	B cells/MD+/24-27+38-	221	-0.024	0.205	0.905	NA	FALSE
B Cell	B cells/A	B cells/A/5-95-	220	0.009	0.079	0.913	NA	FALSE
B Cell	B cells/MD+	B cells/MD+/5-10-21+24-27+38-	216	-0.138	0.202	0.495	NA	FALSE
B Cell	B cells/MD+	B cells/MD+/10-21+24-27+38-	218	-0.015	0.205	0.942	NA	FALSE
B Cell	B cells/MD+	B cells/MD+/5-21+24-27+38-	217	-0.14	0.203	0.492	NA	FALSE
B Cell	B cells/MD+	B cells/MD+/21+24-27+38-	217	-0.015	0.197	0.939	NA	FALSE
B Cell	B cells/A	B cells/A/95-	221	-0.178	0.055	1.55e-03	NA	FALSE
B Cell	B cells/MD+	B cells/MD+/5-10-21-27+38-	216	-0.051	0.251	0.839	NA	FALSE
B Cell	B cells/MD+	B cells/MD+/10-21-27+38-	217	-0.009	0.252	0.971	NA	FALSE
B Cell	B cells/MD+	B cells/MD+/5-21-27+38-	216	-0.044	0.251	0.861	NA	FALSE
B Cell	B cells/MD+	B cells/MD+/21-27+38-	217	0.005	0.251	0.985	NA	FALSE
B Cell	B cells/A	B cells/A/5+95-	220	-0.634	0.18	5.22e-04	NA	FALSE
B Cell	B cells/MD+	B cells/MD+/5-10-27+38-	222	-0.024	0.201	0.906	NA	FALSE
B Cell	B cells/MD+	B cells/MD+/10-27+38-	222	0.015	0.2	0.939	NA	FALSE
B Cell	B cells/MD+	B cells/MD+/5-27+38-	222	-0.026	0.2	0.897	NA	FALSE
B Cell	B cells/MD+	B cells/MD+/27+38-	222	0.016	0.198	0.936	NA	FALSE
B Cell	B cells/MD+	B cells/MD+/5-10-21+27+38-	222	-0.027	0.2	0.894	NA	FALSE
B Cell	B cells/MD+	B cells/MD+/10-21+27+38-	222	0.016	0.199	0.938	NA	FALSE
B Cell	B cells/MD+	B cells/MD+/5-21+27+38-	222	-0.031	0.198	0.875	NA	FALSE
B Cell	B cells/MD+	B cells/MD+/21+27+38-	222	0.014	0.197	0.944	NA	FALSE
B Cell	B cells/MD+	B cells/MD+/5-10-24+27+38-	222	0.005	0.214	0.983	NA	FALSE
B Cell	B cells/MD+	B cells/MD+/10-24+27+38-	222	0.008	0.214	0.968	NA	FALSE
B Cell	B cells/MD+	B cells/MD+/5-24+27+38-	222	0.006	0.213	0.977	NA	FALSE
B Cell	B cells/MD+	B cells/MD+/24+27+38-	222	0.012	0.212	0.953	NA	FALSE
B Cell	B cells/MD+	B cells/MD+/5-10-21+24+27+38-	222	0.001	0.213	0.996	NA	FALSE
B Cell	B cells/MD+	B cells/MD+/10-21+24+27+38-	222	0.002	0.213	0.992	NA	FALSE
B Cell	B cells/MD+	B cells/MD+/5-21+24+27+38-	222	0	0.211	0.999	NA	FALSE
B Cell	B cells/A	B cells/A/5-10-21+95-	221	0.069	0.098	0.482	NA	FALSE
B Cell	B cells/MD+	B cells/MD+/21+24+27+38-	222	0.004	0.211	0.983	NA	FALSE
B Cell	B cells/MD+	B cells/MD+/5-10-21-24-27-	221	-0.071	0.12	0.557	NA	FALSE
B Cell	B cells/MD+	B cells/MD+/10-21-24-27-	221	-0.07	0.119	0.554	NA	FALSE
T Cell	CD8	CD8/28+127-	220	0.136	0.091	0.137	NA	FALSE
B Cell	B cells/MD+	B cells/MD+/5-21-24-27-	221	-0.075	0.12	0.534	NA	FALSE
B Cell	B cells/MD+	B cells/MD+/21-24-27-	221	-0.074	0.118	0.534	NA	FALSE
B Cell	B cells/A	B cells/A/10-21+95-	220	-0.182	0.065	5.55e-03	NA	FALSE
B Cell	B cells/MD+	B cells/MD+/5-10-24-27-	216	-0.019	0.027	0.484	NA	FALSE
B Cell	B cells/MD+	B cells/MD+/10-24-27-	216	-0.011	0.024	0.642	NA	FALSE
B Cell	B cells/MD+	B cells/MD+/5+10-24-27-	222	0.096	0.105	0.363	NA	FALSE
B Cell	B cells/MD+	B cells/MD+/5-24-27-	216	-0.018	0.026	0.489	NA	FALSE
B Cell	B cells/MD+	B cells/MD+/24-27-	216	-0.012	0.023	0.603	NA	FALSE
B Cell	B cells/MD+	B cells/MD+/5+24-27-	222	0.061	0.106	0.565	NA	FALSE
B Cell	B cells/A	B cells/A/5+10-21+95-	219	-0.642	0.187	7.09e-04	NA	FALSE
B Cell	B cells/MD+	B cells/MD+/5-10+24-27-	221	0.01	0.179	0.954	NA	FALSE
B Cell	B cells/MD+	B cells/MD+/10+24-27-	222	-0.016	0.171	0.926	NA	FALSE
B Cell	B cells/MD+	B cells/MD+/5+10+24-27-	210	-0.194	0.176	0.272	NA	FALSE
B Cell	B cells/MD+	B cells/MD+/5-10-21+24-27-	215	-0.019	0.031	0.549	NA	FALSE
B Cell	B cells/MD+	B cells/MD+/10-21+24-27-	214	-0.014	0.028	0.634	NA	FALSE
T Cell	DNT	DNT/28-31-57-127+244-RA+	196	0.338	0.227	0.138	NA	FALSE
B Cell	B cells/MD+	B cells/MD+/5+10-21+24-27-	222	0.081	0.109	0.462	NA	FALSE
B Cell	B cells/MD+	B cells/MD+/5-21+24-27-	215	-0.017	0.03	0.572	NA	FALSE
B Cell	B cells/MD+	B cells/MD+/21+24-27-	215	-0.012	0.028	0.676	NA	FALSE
B Cell	B cells/MD+	B cells/MD+/5+21+24-27-	222	0.044	0.111	0.691	NA	FALSE
B Cell	B cells/MD+	B cells/MD+/5-10+21+24-27-	220	0.038	0.181	0.833	NA	FALSE
B Cell	B cells/A	B cells/A/5-21+95-	220	0.066	0.093	0.475	NA	FALSE
B Cell	B cells/MD+	B cells/MD+/10+21+24-27-	221	-0.017	0.171	0.92	NA	FALSE
B Cell	B cells/MD+	B cells/MD+/5-10-21-27-	222	-0.062	0.117	0.601	NA	FALSE
B Cell	B cells/MD+	B cells/MD+/10-21-27-	222	-0.061	0.116	0.601	NA	FALSE
T Cell	DNT	DNT/27+28-31-57-127+244-RA+	195	0.356	0.246	0.149	NA	FALSE
B Cell	B cells/MD+	B cells/MD+/5-21-27-	222	-0.068	0.113	0.549	NA	FALSE
B Cell	B cells/MD+	B cells/MD+/21-27-	222	-0.068	0.111	0.536	NA	FALSE
B Cell	B cells/MD+	B cells/MD+/5+21-27-	218	0.051	0.152	0.737	NA	FALSE
B Cell	B cells/MD+	B cells/MD+/5-10+21-27-	216	-0.047	0.157	0.765	NA	FALSE
B Cell	B cells/MD+	B cells/MD+/10+21-27-	218	-0.135	0.151	0.371	NA	FALSE
B Cell	B cells/A	B cells/A/21+95-	220	-0.167	0.063	8.73e-03	NA	FALSE
B Cell	B cells/MD+	B cells/MD+/5-10-27-	218	-0.003	0.018	0.853	NA	FALSE
B Cell	B cells/MD+	B cells/MD+/10-27-	216	0.001	0.014	0.928	NA	FALSE
T Cell	DNT	DNT/27-31-57-127+244-RA+	196	0.094	0.177	0.597	NA	FALSE
B Cell	B cells/MD+	B cells/MD+/5+10-27-	222	0.077	0.104	0.462	NA	FALSE
B Cell	B cells/MD+	B cells/MD+/5-27-	216	-0.006	0.015	0.697	NA	FALSE
B Cell	B cells/MD+	B cells/MD+/27-	215	-0.004	0.011	0.677	NA	FALSE
B Cell	B cells/MD+	B cells/MD+/5+27-	222	0.015	0.104	0.884	NA	FALSE
B Cell	B cells/MD+	B cells/MD+/5-10+27-	222	-0.018	0.118	0.877	NA	FALSE
B Cell	B cells/MD+	B cells/MD+/10+27-	222	-0.062	0.113	0.587	NA	FALSE
B Cell	B cells/MD+	B cells/MD+/5+10+27-	220	-0.203	0.14	0.149	NA	FALSE
B Cell	B cells/A	B cells/A/5+21+95-	219	-0.632	0.185	7.42e-04	NA	FALSE
B Cell	B cells/MD+	B cells/MD+/5-10-21+27-	216	0.011	0.023	0.636	NA	FALSE
B Cell	B cells/MD+	B cells/MD+/10-21+27-	216	0.014	0.021	0.512	NA	FALSE
T Cell	DNT	DNT/31-57-127+244-RA+	196	0.158	0.175	0.369	NA	FALSE
B Cell	B cells/MD+	B cells/MD+/5+10-21+27-	222	0.064	0.107	0.547	NA	FALSE
B Cell	B cells/MD+	B cells/MD+/5-21+27-	215	0.01	0.02	0.61	NA	FALSE
B Cell	B cells/MD+	B cells/MD+/21+27-	216	0.01	0.02	0.614	NA	FALSE
B Cell	B cells/MD+	B cells/MD+/5+21+27-	222	0.002	0.108	0.982	NA	FALSE
B Cell	B cells/MD+	B cells/MD+/5-10+21+27-	222	-0.002	0.123	0.986	NA	FALSE
B Cell	B cells/MD+	B cells/MD+/10+21+27-	222	-0.064	0.118	0.585	NA	FALSE
B Cell	B cells/MD+	B cells/MD+/5+10+21+27-	219	-0.189	0.147	0.2	NA	FALSE
B Cell	B cells/MD+	B cells/MD+/5-10-21-24+27-	222	0.026	0.172	0.879	NA	FALSE
B Cell	B cells/MD+	B cells/MD+/10-21-24+27-	222	0.033	0.169	0.845	NA	FALSE
T Cell	DNT	DNT/27+31-57-127+244-RA+	195	0.169	0.183	0.359	NA	FALSE
B Cell	B cells/MD+	B cells/MD+/5-21-24+27-	221	-0.05	0.129	0.7	NA	FALSE
B Cell	B cells/MD+	B cells/MD+/21-24+27-	221	-0.045	0.125	0.716	NA	FALSE
B Cell	B cells/MD+	B cells/MD+/5-10+21-24+27-	216	0.012	0.164	0.94	NA	FALSE
B Cell	B cells/MD+	B cells/MD+/10+21-24+27-	218	-0.091	0.155	0.557	NA	FALSE
B Cell	B cells/MD+	B cells/MD+/5-10-24+27-	220	0.07	0.095	0.462	NA	FALSE
B Cell	B cells/MD+	B cells/MD+/10-24+27-	221	0.076	0.093	0.416	NA	FALSE
T Cell	DNT	DNT/27-28+31-57-127+244-RA+	196	0.095	0.195	0.629	NA	FALSE
B Cell	B cells/MD+	B cells/MD+/5+10-24+27-	219	0.07	0.139	0.617	NA	FALSE
B Cell	B cells/MD+	B cells/MD+/5-24+27-	220	0.045	0.08	0.572	NA	FALSE
B Cell	B cells/MD+	B cells/MD+/24+27-	221	0.034	0.079	0.663	NA	FALSE
B Cell	B cells/MD+	B cells/MD+/5+24+27-	223	-0.009	0.133	0.948	NA	FALSE
B Cell	B cells/MD+	B cells/MD+/5-10+24+27-	222	-0.056	0.118	0.637	NA	FALSE
B Cell	B cells/MD+	B cells/MD+/10+24+27-	222	-0.092	0.113	0.42	NA	FALSE
B Cell	B cells/MD+	B cells/MD+/5+10+24+27-	218	-0.166	0.144	0.249	NA	FALSE
B Cell	B cells/MD+	B cells/MD+/5-10-21+24+27-	221	0.077	0.099	0.441	NA	FALSE
B Cell	B cells/MD+	B cells/MD+/10-21+24+27-	220	0.044	0.095	0.645	NA	FALSE
B Cell	B cells/MD+	B cells/MD+/5+10-21+24+27-	220	0.072	0.141	0.609	NA	FALSE
T Cell	DNT	DNT/28+31-57-127+244-RA+	195	0.138	0.182	0.45	NA	FALSE
B Cell	B cells/MD+	B cells/MD+/5-21+24+27-	221	0.05	0.087	0.569	NA	FALSE
B Cell	B cells/MD+	B cells/MD+/21+24+27-	221	0.005	0.085	0.957	NA	FALSE
B Cell	B cells/MD+	B cells/MD+/5+21+24+27-	223	-0.017	0.139	0.905	NA	FALSE
B Cell	B cells/MD+	B cells/MD+/5-10+21+24+27-	222	-0.081	0.125	0.52	NA	FALSE
B Cell	B cells/MD+	B cells/MD+/10+21+24+27-	222	-0.117	0.12	0.334	NA	FALSE
B Cell	B cells/MD+	B cells/MD+/5+10+21+24+27-	218	-0.144	0.153	0.35	NA	FALSE
B Cell	B cells/MD+	B cells/MD+/5-10-21-24-	221	-0.056	0.118	0.638	NA	FALSE
B Cell	B cells/MD+	B cells/MD+/10-21-24-	221	-0.051	0.117	0.665	NA	FALSE
T Cell	DNT	DNT/27+28+31-57-127+244-RA+	195	0.153	0.191	0.425	NA	FALSE
B Cell	B cells/MD+	B cells/MD+/5-21-24-	221	-0.06	0.117	0.609	NA	FALSE
B Cell	B cells/MD+	B cells/MD+/21-24-	221	-0.055	0.116	0.636	NA	FALSE
B Cell	B cells/MD+	B cells/MD+/5+21-24-	211	-0.042	0.156	0.786	NA	FALSE
B Cell	B cells/MD+	B cells/MD+/5-10-24-	216	-0.022	0.025	0.393	NA	FALSE
B Cell	B cells/MD+	B cells/MD+/10-24-	218	-0.007	0.023	0.764	NA	FALSE
B Cell	B cells/MD+	B cells/MD+/5+10-24-	221	0.139	0.097	0.155	NA	FALSE
T Cell	CD8	CD8/27+28+127-	221	0.097	0.104	0.35	NA	FALSE
T Cell	DNT	DNT/27-28-57-127+244-RA+	194	0.156	0.179	0.382	NA	FALSE
B Cell	B cells/MD+	B cells/MD+/5-24-	216	-0.021	0.024	0.395	NA	FALSE
B Cell	B cells/MD+	B cells/MD+/24-	219	-0.006	0.023	0.8	NA	FALSE
B Cell	B cells/MD+	B cells/MD+/5+24-	221	0.109	0.099	0.271	NA	FALSE
B Cell	B cells/MD+	B cells/MD+/5-10+24-	221	0.001	0.178	0.994	NA	FALSE
B Cell	B cells/MD+	B cells/MD+/10+24-	222	-0.018	0.167	0.915	NA	FALSE
B Cell	B cells/MD+	B cells/MD+/5+10+24-	211	-0.171	0.169	0.312	NA	FALSE
B Cell	B cells/MD+	B cells/MD+/5-10-21+24-	216	-0.018	0.03	0.548	NA	FALSE
B Cell	B cells/MD+	B cells/MD+/10-21+24-	215	-0.009	0.027	0.74	NA	FALSE
B Cell	B cells/MD+	B cells/MD+/5+10-21+24-	222	0.111	0.104	0.288	NA	FALSE
B Cell	B cells/MD+	B cells/MD+/5-21+24-	216	-0.017	0.029	0.57	NA	FALSE
B Cell	B cells/MD+	B cells/MD+/21+24-	216	-0.007	0.027	0.803	NA	FALSE
B Cell	B cells/MD+	B cells/MD+/5+21+24-	222	0.084	0.106	0.43	NA	FALSE
B Cell	B cells/MD+	B cells/MD+/5-10+21+24-	221	0.036	0.182	0.846	NA	FALSE
B Cell	B cells/MD+	B cells/MD+/10+21+24-	221	-0.016	0.168	0.926	NA	FALSE
B Cell	B cells/MD+	B cells/MD+/5+10+21+24-	210	-0.207	0.17	0.225	NA	FALSE
B Cell	B cells/MD+	B cells/MD+/5-10-21-	221	-0.047	0.114	0.679	NA	FALSE
B Cell	B cells/MD+	B cells/MD+/10-21-	221	-0.044	0.113	0.7	NA	FALSE
B Cell	B cells/MD+	B cells/MD+/5+10-21-	209	0.022	0.153	0.887	NA	FALSE
T Cell	DNT	DNT/28-57-127+244-RA+	196	0.297	0.219	0.177	NA	FALSE
B Cell	B cells/MD+	B cells/MD+/5-21-	221	-0.052	0.109	0.633	NA	FALSE
B Cell	B cells/MD+	B cells/MD+/21-	222	-0.059	0.111	0.591	NA	FALSE
B Cell	B cells/MD+	B cells/MD+/5+21-	218	0.098	0.142	0.49	NA	FALSE
B Cell	B cells/MD+	B cells/MD+/5-10+21-	217	-0.037	0.153	0.807	NA	FALSE
B Cell	B cells/MD+	B cells/MD+/10+21-	219	-0.125	0.15	0.404	NA	FALSE
B Cell	B cells/MD+	B cells/MD+/5-10-	220	-0.007	0.014	0.623	NA	FALSE
B Cell	B cells/MD+	B cells/MD+/10-	220	0.002	0.009	0.826	NA	FALSE
T Cell	DNT	DNT/27+28-57-127+244-RA+	194	0.284	0.233	0.224	NA	FALSE
B Cell	B cells/MD+	B cells/MD+/5+10-	221	0.13	0.096	0.179	NA	FALSE
B Cell	B cells/MD+	B cells/MD+/5-	217	-0.003	0.008	0.698	NA	FALSE
B Cell	B cells/MD+	B cells/MD+/5+	222	0.07	0.1	0.482	NA	FALSE
B Cell	B cells/MD+	B cells/MD+/5-10+	222	-0.026	0.114	0.818	NA	FALSE
B Cell	B cells/MD+	B cells/MD+/10+	222	-0.057	0.109	0.598	NA	FALSE
B Cell	B cells/MD+	B cells/MD+/5+10+	221	-0.145	0.138	0.297	NA	FALSE
B Cell	B cells/MD+	B cells/MD+/5-10-21+	216	0.001	0.017	0.933	NA	FALSE
B Cell	B cells/MD+	B cells/MD+/10-21+	218	0.008	0.016	0.625	NA	FALSE
T Cell	DNT	DNT/27-57-127+244-RA+	196	0.029	0.176	0.869	NA	FALSE
B Cell	B cells/MD+	B cells/MD+/5+10-21+	222	0.11	0.102	0.281	NA	FALSE
B Cell	B cells/MD+	B cells/MD+/5-21+	217	0.003	0.014	0.827	NA	FALSE
B Cell	B cells/MD+	B cells/MD+/21+	219	0.004	0.014	0.768	NA	FALSE
B Cell	B cells/MD+	B cells/MD+/5+21+	222	0.056	0.104	0.59	NA	FALSE
B Cell	B cells/MD+	B cells/MD+/5-10+21+	222	-0.017	0.118	0.887	NA	FALSE
B Cell	B cells/MD+	B cells/MD+/10+21+	222	-0.063	0.112	0.573	NA	FALSE
B Cell	B cells/MD+	B cells/MD+/5+10+21+	222	-0.189	0.147	0.202	NA	FALSE
B Cell	B cells/MD+	B cells/MD+/5-10-21-24+	223	0.006	0.182	0.973	NA	FALSE
B Cell	B cells/MD+	B cells/MD+/10-21-24+	223	0.018	0.181	0.919	NA	FALSE
T Cell	DNT	DNT/57-127+244-RA+	196	-0.025	0.18	0.888	NA	FALSE
B Cell	B cells/MD+	B cells/MD+/5-21-24+	222	-0.044	0.144	0.763	NA	FALSE
B Cell	B cells/MD+	B cells/MD+/21-24+	222	-0.032	0.14	0.818	NA	FALSE
B Cell	B cells/MD+	B cells/MD+/5-10+21-24+	217	0.033	0.161	0.836	NA	FALSE
B Cell	B cells/MD+	B cells/MD+/10+21-24+	219	-0.068	0.153	0.658	NA	FALSE
B Cell	B cells/MD+	B cells/MD+/5-10-24+	222	0.041	0.108	0.707	NA	FALSE
B Cell	B cells/MD+	B cells/MD+/10-24+	222	0.042	0.105	0.688	NA	FALSE
T Cell	DNT	DNT/27+57-127+244-RA+	196	-0.029	0.188	0.879	NA	FALSE
B Cell	B cells/MD+	B cells/MD+/5+10-24+	219	0.085	0.135	0.531	NA	FALSE
B Cell	B cells/MD+	B cells/MD+/5-24+	221	0.018	0.091	0.842	NA	FALSE
B Cell	B cells/MD+	B cells/MD+/24+	220	-0.02	0.086	0.818	NA	FALSE
B Cell	B cells/MD+	B cells/MD+/5+24+	221	0.021	0.126	0.866	NA	FALSE
B Cell	B cells/MD+	B cells/MD+/5-10+24+	222	-0.064	0.113	0.57	NA	FALSE
B Cell	B cells/MD+	B cells/MD+/10+24+	222	-0.089	0.108	0.411	NA	FALSE
B Cell	B cells/MD+	B cells/MD+/5+10+24+	220	-0.114	0.145	0.434	NA	FALSE
B Cell	B cells/MD+	B cells/MD+/5-10-21+24+	222	0.035	0.107	0.744	NA	FALSE
B Cell	B cells/MD+	B cells/MD+/10-21+24+	221	0.002	0.103	0.984	NA	FALSE
T Cell	DNT	DNT/27-28+57-127+244-RA+	196	-0.008	0.198	0.968	NA	FALSE
B Cell	B cells/MD+	B cells/MD+/5+10-21+24+	219	0.079	0.136	0.561	NA	FALSE
B Cell	B cells/MD+	B cells/MD+/5-21+24+	221	0.014	0.093	0.878	NA	FALSE
B Cell	B cells/MD+	B cells/MD+/21+24+	220	-0.028	0.088	0.748	NA	FALSE
B Cell	B cells/MD+	B cells/MD+/5+21+24+	223	-0.005	0.133	0.967	NA	FALSE
B Cell	B cells/MD+	B cells/MD+/5-10+21+24+	222	-0.09	0.119	0.449	NA	FALSE
B Cell	B cells/MD+	B cells/MD+/10+21+24+	222	-0.113	0.114	0.322	NA	FALSE
B Cell	B cells/MD+	B cells/MD+/5+10+21+24+	219	-0.101	0.152	0.508	NA	FALSE
T Cell	DNT	DNT/28+57-127+244-RA+	196	-0.048	0.185	0.794	NA	FALSE
B Cell	B cells/MD+	B cells/MD+/5-10-24-27+	220	-0.064	0.158	0.686	NA	FALSE
B Cell	B cells/MD+	B cells/MD+/10-24-27+	220	0.091	0.138	0.512	NA	FALSE
T Cell	DNT	DNT/27+28+57-127+244-RA+	196	-0.054	0.192	0.78	NA	FALSE
B Cell	B cells/MD+	B cells/MD+/5-24-27+	220	-0.076	0.157	0.63	NA	FALSE
B Cell	B cells/A	B cells/A/5-10-24+95-	221	-0.076	0.116	0.513	NA	FALSE
B Cell	B cells/MD+	B cells/MD+/24-27+	220	0.093	0.136	0.496	NA	FALSE
B Cell	B cells/MD+	B cells/MD+/5+24-27+	206	0.316	0.134	0.019	NA	FALSE
B Cell	B cells/MD+	B cells/MD+/5-10-21+24-27+	217	-0.084	0.146	0.567	NA	FALSE
B Cell	B cells/MD+	B cells/MD+/10-21+24-27+	220	0.095	0.134	0.478	NA	FALSE
T Cell	CD8	CD8/27-28-31+127-	222	-0.542	0.208	9.8e-03	NA	FALSE
B Cell	B cells/MD+	B cells/MD+/5-21+24-27+	217	-0.093	0.146	0.524	NA	FALSE
B Cell	B cells/MD+	B cells/MD+/21+24-27+	219	0.112	0.132	0.397	NA	FALSE
B Cell	B cells/A	B cells/A/10-24+95-	220	-0.006	0.114	0.957	NA	FALSE
B Cell	B cells/MD+	B cells/MD+/5+21+24-27+	206	0.294	0.136	0.032	NA	FALSE
B Cell	B cells/MD+	B cells/MD+/5-10-21-27+	218	-0.092	0.237	0.699	NA	FALSE
B Cell	B cells/MD+	B cells/MD+/10-21-27+	220	-0.046	0.23	0.842	NA	FALSE
T Cell	DNT	DNT/28-31+57-127+244-RA+	194	0.19	0.258	0.461	NA	FALSE
B Cell	B cells/MD+	B cells/MD+/5-21-27+	219	-0.083	0.236	0.724	NA	FALSE
B Cell	B cells/MD+	B cells/MD+/21-27+	221	-0.048	0.227	0.831	NA	FALSE
B Cell	B cells/MD+	B cells/MD+/5-10-27+	223	-0.032	0.182	0.862	NA	FALSE
B Cell	B cells/MD+	B cells/MD+/10-27+	223	0.013	0.17	0.938	NA	FALSE
B Cell	B cells/MD+	B cells/MD+/5+10-27+	214	0.218	0.14	0.122	NA	FALSE
B Cell	B cells/MD+	B cells/MD+/5-27+	223	-0.04	0.18	0.823	NA	FALSE
B Cell	B cells/MD+	B cells/MD+/27+	223	0.009	0.167	0.957	NA	FALSE
B Cell	B cells/MD+	B cells/MD+/5+27+	214	0.233	0.133	0.081	NA	FALSE
B Cell	B cells/A	B cells/A/5-24+95-	220	-0.012	0.112	0.914	NA	FALSE
B Cell	B cells/MD+	B cells/MD+/5-10-21+27+	223	-0.051	0.177	0.773	NA	FALSE
B Cell	B cells/MD+	B cells/MD+/10-21+27+	223	0	0.166	0.999	NA	FALSE
B Cell	B cells/MD+	B cells/MD+/5+10-21+27+	213	0.198	0.143	0.167	NA	FALSE
T Cell	DNT	DNT/27+28-31+57-127+244-RA+	192	0.202	0.281	0.473	NA	FALSE
B Cell	B cells/MD+	B cells/MD+/5-21+27+	223	-0.061	0.176	0.728	NA	FALSE
B Cell	B cells/MD+	B cells/MD+/21+27+	223	-0.003	0.163	0.984	NA	FALSE
B Cell	B cells/MD+	B cells/MD+/5+21+27+	213	0.22	0.134	0.102	NA	FALSE
T Cell	DNT	DNT/27-31+57-127+244-RA+	195	-0.037	0.217	0.863	NA	FALSE
T Cell	DNT	DNT/31+57-127+244-RA+	196	-0.158	0.219	0.471	NA	FALSE
T Cell	DNT	DNT/27+31+57-127+244-RA+	196	-0.161	0.226	0.478	NA	FALSE
T Cell	DNT	DNT/27-28+31+57-127+244-RA+	194	-0.112	0.247	0.65	NA	FALSE
T Cell	DNT	DNT/28+31+57-127+244-RA+	196	-0.193	0.218	0.376	NA	FALSE
T Cell	DNT	DNT/27+28+31+57-127+244-RA+	196	-0.197	0.224	0.38	NA	FALSE
T Cell	CD8	CD8/28-31+127-	222	-0.528	0.169	2.08e-03	NA	FALSE
T Cell	DNT	DNT/28-31-127+244-RA+	196	0.335	0.227	0.141	NA	FALSE
T Cell	DNT	DNT/27+28-31-127+244-RA+	195	0.354	0.245	0.151	NA	FALSE
T Cell	DNT	DNT/27-31-127+244-RA+	196	0.09	0.177	0.61	NA	FALSE
T Cell	DNT	DNT/31-127+244-RA+	196	0.157	0.175	0.371	NA	FALSE
T Cell	DNT	DNT/27+31-127+244-RA+	195	0.168	0.183	0.36	NA	FALSE
T Cell	DNT	DNT/27-28+31-127+244-RA+	196	0.092	0.196	0.638	NA	FALSE
T Cell	DNT	DNT/28+31-127+244-RA+	195	0.137	0.182	0.451	NA	FALSE
T Cell	DNT	DNT/27+28+31-127+244-RA+	195	0.153	0.191	0.425	NA	FALSE
T Cell	CD8	CD8/27+28-31+127-	220	-0.428	0.167	0.011	NA	FALSE
T Cell	DNT	DNT/27-28-127+244-RA+	194	0.152	0.178	0.394	NA	FALSE
T Cell	DNT	DNT/28-127+244-RA+	196	0.294	0.219	0.18	NA	FALSE
T Cell	DNT	DNT/27+28-127+244-RA+	194	0.282	0.233	0.227	NA	FALSE
T Cell	DNT	DNT/27-127+244-RA+	196	0.026	0.176	0.882	NA	FALSE
T Cell	DNT	DNT/127+244-RA+	196	-0.026	0.179	0.887	NA	FALSE
T Cell	DNT	DNT/27+127+244-RA+	196	-0.029	0.188	0.879	NA	FALSE
T Cell	DNT	DNT/27-28+127+244-RA+	196	-0.01	0.199	0.96	NA	FALSE
T Cell	DNT	DNT/28+127+244-RA+	196	-0.049	0.185	0.793	NA	FALSE
T Cell	DNT	DNT/27+28+127+244-RA+	196	-0.054	0.192	0.781	NA	FALSE
T Cell	CD8	CD8/27-31+127-	223	-0.404	0.178	0.025	NA	FALSE
T Cell	DNT	DNT/28-31+127+244-RA+	194	0.187	0.257	0.469	NA	FALSE
T Cell	DNT	DNT/27+28-31+127+244-RA+	192	0.2	0.281	0.478	NA	FALSE
T Cell	DNT	DNT/27-31+127+244-RA+	195	-0.041	0.217	0.85	NA	FALSE
T Cell	DNT	DNT/31+127+244-RA+	196	-0.158	0.219	0.471	NA	FALSE
T Cell	DNT	DNT/27+31+127+244-RA+	196	-0.16	0.226	0.479	NA	FALSE
T Cell	DNT	DNT/27-28+31+127+244-RA+	194	-0.114	0.247	0.645	NA	FALSE
T Cell	DNT	DNT/28+31+127+244-RA+	196	-0.193	0.218	0.378	NA	FALSE
T Cell	DNT	DNT/27+28+31+127+244-RA+	196	-0.196	0.224	0.383	NA	FALSE
T Cell	CD8	CD8/31+127-	222	-0.324	0.116	5.74e-03	NA	FALSE
T Cell	CD8	CD8/27+31+127-	222	-0.209	0.118	0.079	NA	FALSE
T Cell	CD8	CD8/27-28+31+127-	223	0.038	0.142	0.788	NA	FALSE
T Cell	DNT	DNT/27-31-57-95+127+244-RA+	187	0.223	0.239	0.352	NA	FALSE
T Cell	DNT	DNT/31-57-95+127+244-RA+	197	0.07	0.17	0.682	NA	FALSE
T Cell	DNT	DNT/27+31-57-95+127+244-RA+	196	0.054	0.172	0.751	NA	FALSE
T Cell	DNT	DNT/28+31-57-95+127+244-RA+	196	0.067	0.174	0.699	NA	FALSE
T Cell	DNT	DNT/27-57-95+127+244-RA+	193	0.256	0.229	0.265	NA	FALSE
T Cell	CD8	CD8/28+31+127-	223	-0.035	0.112	0.753	NA	FALSE
T Cell	DNT	DNT/57-95+127+244-RA+	197	-0.022	0.166	0.893	NA	FALSE
T Cell	DNT	DNT/27+57-95+127+244-RA+	197	-0.046	0.172	0.788	NA	FALSE
T Cell	DNT	DNT/27-28+57-95+127+244-RA+	191	0.263	0.245	0.284	NA	FALSE
T Cell	DNT	DNT/28+57-95+127+244-RA+	196	-0.033	0.167	0.844	NA	FALSE
T Cell	DNT	DNT/27+28+57-95+127+244-RA+	196	-0.059	0.171	0.729	NA	FALSE
T Cell	DNT	DNT/31+57-95+127+244-RA+	197	-0.07	0.195	0.72	NA	FALSE
T Cell	DNT	DNT/27+31+57-95+127+244-RA+	196	-0.104	0.199	0.6	NA	FALSE
T Cell	DNT	DNT/28+31+57-95+127+244-RA+	197	-0.079	0.198	0.689	NA	FALSE
T Cell	CD8	CD8/27+28+31+127-	222	-0.083	0.12	0.493	NA	FALSE
T Cell	DNT	DNT/27-31-95+127+244-RA+	187	0.212	0.237	0.373	NA	FALSE
T Cell	DNT	DNT/31-95+127+244-RA+	197	0.068	0.17	0.69	NA	FALSE
T Cell	DNT	DNT/27+31-95+127+244-RA+	196	0.054	0.172	0.754	NA	FALSE
T Cell	DNT	DNT/28+31-95+127+244-RA+	196	0.066	0.174	0.703	NA	FALSE
T Cell	CD8	CD8/27-28-31-57+127-	222	-0.06	0.243	0.805	NA	FALSE
T Cell	DNT	DNT/27+28+31-95+127+244-RA+	197	0.067	0.182	0.713	NA	FALSE
T Cell	DNT	DNT/27-95+127+244-RA+	193	0.247	0.228	0.28	NA	FALSE
T Cell	DNT	DNT/95+127+244-RA+	197	-0.023	0.165	0.888	NA	FALSE
T Cell	DNT	DNT/27+95+127+244-RA+	197	-0.046	0.172	0.789	NA	FALSE
T Cell	DNT	DNT/27-28+95+127+244-RA+	191	0.259	0.245	0.292	NA	FALSE
T Cell	DNT	DNT/28+95+127+244-RA+	196	-0.033	0.167	0.842	NA	FALSE
T Cell	CD8	CD8/28-31-57+127-	222	-0.065	0.222	0.771	NA	FALSE
T Cell	DNT	DNT/27+28+95+127+244-RA+	196	-0.059	0.171	0.732	NA	FALSE
T Cell	DNT	DNT/31+95+127+244-RA+	197	-0.07	0.195	0.72	NA	FALSE
T Cell	DNT	DNT/27+31+95+127+244-RA+	196	-0.103	0.198	0.603	NA	FALSE
T Cell	DNT	DNT/28+31+95+127+244-RA+	197	-0.078	0.197	0.693	NA	FALSE
T Cell	CD8	CD8/27+28-31-57+127-	219	-0.313	0.269	0.245	NA	FALSE
T Cell	DNT	DNT/27+28+31+95+127+244-RA+	196	-0.111	0.199	0.579	NA	FALSE
T Cell	CD4	CD4/28-31-57-95+127-RA-	222	-0.143	0.303	0.637	NA	FALSE
T Cell	CD8	CD8/27-31-57+127-	222	-0.067	0.24	0.781	NA	FALSE
T Cell	CD8	CD8/31-57+127-	222	-0.072	0.216	0.738	NA	FALSE
T Cell	DNT	DNT/27-28-31-57-95-127-RA+	197	0.139	0.201	0.49	NA	FALSE
T Cell	DNT	DNT/28-31-57-95-127-RA+	197	0.053	0.187	0.779	NA	FALSE
T Cell	DNT	DNT/27+28-31-57-95-127-RA+	191	-0.431	0.208	0.04	NA	FALSE
T Cell	DNT	DNT/27-31-57-95-127-RA+	197	0.12	0.196	0.541	NA	FALSE
T Cell	CD4	CD4/27-31-57-95+127-RA-	222	0.042	0.13	0.745	NA	FALSE
T Cell	DNT	DNT/31-57-95-127-RA+	197	-0.007	0.171	0.969	NA	FALSE
T Cell	DNT	DNT/27+31-57-95-127-RA+	196	-0.404	0.176	0.023	NA	FALSE
T Cell	CD8	CD8/27+31-57+127-	218	-0.292	0.252	0.25	NA	FALSE
T Cell	DNT	DNT/28+31-57-95-127-RA+	196	-0.217	0.171	0.206	NA	FALSE
T Cell	DNT	DNT/27+28+31-57-95-127-RA+	194	-0.278	0.186	0.136	NA	FALSE
T Cell	DNT	DNT/27-28-57-95-127-RA+	197	0.158	0.149	0.288	NA	FALSE
T Cell	DNT	DNT/28-57-95-127-RA+	197	0.137	0.138	0.322	NA	FALSE
T Cell	DNT	DNT/27+28-57-95-127-RA+	196	-0.141	0.177	0.429	NA	FALSE
T Cell	DNT	DNT/27-57-95-127-RA+	197	0.125	0.146	0.39	NA	FALSE
T Cell	DNT	DNT/57-95-127-RA+	197	0.014	0.128	0.916	NA	FALSE
T Cell	CD4	CD4/31-57-95+127-RA-	220	0.103	0.075	0.169	NA	FALSE
T Cell	DNT	DNT/27+57-95-127-RA+	196	-0.254	0.157	0.107	NA	FALSE
T Cell	DNT	DNT/27-28+57-95-127-RA+	195	-0.165	0.182	0.366	NA	FALSE
T Cell	DNT	DNT/28+57-95-127-RA+	197	-0.349	0.174	0.046	NA	FALSE
T Cell	DNT	DNT/27+28+57-95-127-RA+	196	-0.516	0.192	7.93e-03	NA	FALSE
T Cell	DNT	DNT/27-28-31+57-95-127-RA+	197	0.129	0.151	0.393	NA	FALSE
T Cell	DNT	DNT/28-31+57-95-127-RA+	197	0.132	0.142	0.353	NA	FALSE
T Cell	DNT	DNT/27+28-31+57-95-127-RA+	196	-0.016	0.195	0.934	NA	FALSE
T Cell	DNT	DNT/27-31+57-95-127-RA+	197	0.092	0.149	0.537	NA	FALSE
T Cell	DNT	DNT/31+57-95-127-RA+	197	-0.019	0.138	0.889	NA	FALSE
T Cell	DNT	DNT/27+31+57-95-127-RA+	197	-0.329	0.192	0.089	NA	FALSE
T Cell	CD4	CD4/27+31-57-95+127-RA-	220	0.115	0.073	0.118	NA	FALSE
T Cell	DNT	DNT/27-28+31+57-95-127-RA+	192	-0.247	0.189	0.193	NA	FALSE
T Cell	CD4	CD4/27-31-57-95-127-244-RA-	218	0.054	0.131	0.678	NA	FALSE
T Cell	DNT	DNT/28+31+57-95-127-RA+	195	-0.441	0.197	0.027	NA	FALSE
T Cell	DNT	DNT/27+28+31+57-95-127-RA+	195	-0.619	0.235	9.08e-03	NA	FALSE
T Cell	DNT	DNT/27-28-31-95-127-RA+	197	0.109	0.209	0.602	NA	FALSE
T Cell	DNT	DNT/28-31-95-127-RA+	197	0.037	0.195	0.851	NA	FALSE
T Cell	DNT	DNT/27+28-31-95-127-RA+	192	-0.571	0.217	9.14e-03	NA	FALSE
T Cell	DNT	DNT/27-31-95-127-RA+	197	0.094	0.203	0.643	NA	FALSE
T Cell	DNT	DNT/31-95-127-RA+	197	-0.011	0.179	0.95	NA	FALSE
T Cell	DNT	DNT/27+31-95-127-RA+	196	-0.433	0.181	0.018	NA	FALSE
T Cell	CD4	CD4/27-28+31-57-95+127-RA-	222	0.054	0.117	0.646	NA	FALSE
T Cell	DNT	DNT/28+31-95-127-RA+	196	-0.23	0.169	0.175	NA	FALSE
T Cell	DNT	DNT/27+28+31-95-127-RA+	194	-0.285	0.185	0.125	NA	FALSE
T Cell	DNT	DNT/27-28-95-127-RA+	197	0.155	0.154	0.315	NA	FALSE
T Cell	DNT	DNT/28-95-127-RA+	197	0.139	0.143	0.333	NA	FALSE
T Cell	DNT	DNT/27+28-95-127-RA+	196	-0.175	0.184	0.344	NA	FALSE
T Cell	DNT	DNT/27-95-127-RA+	197	0.127	0.15	0.399	NA	FALSE
T Cell	DNT	DNT/95-127-RA+	197	0.026	0.132	0.843	NA	FALSE
T Cell	DNT	DNT/27+95-127-RA+	196	-0.276	0.16	0.085	NA	FALSE
T Cell	DNT	DNT/27-28+95-127-RA+	196	-0.157	0.185	0.396	NA	FALSE
T Cell	DNT	DNT/28+95-127-RA+	197	-0.352	0.173	0.044	NA	FALSE
T Cell	CD4	CD4/28+31-57-95+127-RA-	219	0.117	0.071	0.101	NA	FALSE
T Cell	DNT	DNT/27+28+95-127-RA+	196	-0.514	0.192	8e-03	NA	FALSE
T Cell	DNT	DNT/27-28-31+95-127-RA+	197	0.133	0.147	0.366	NA	FALSE
T Cell	DNT	DNT/28-31+95-127-RA+	197	0.141	0.14	0.316	NA	FALSE
T Cell	DNT	DNT/27+28-31+95-127-RA+	196	-0.059	0.2	0.768	NA	FALSE
T Cell	DNT	DNT/27-31+95-127-RA+	197	0.1	0.145	0.494	NA	FALSE
T Cell	DNT	DNT/31+95-127-RA+	197	-0.006	0.136	0.963	NA	FALSE
T Cell	DNT	DNT/27+31+95-127-RA+	197	-0.344	0.193	0.076	NA	FALSE
T Cell	DNT	DNT/27-28+31+95-127-RA+	192	-0.25	0.189	0.187	NA	FALSE
T Cell	DNT	DNT/28+31+95-127-RA+	195	-0.435	0.197	0.029	NA	FALSE
T Cell	CD8	CD8/27-28-57+127-	222	-0.27	0.23	0.242	NA	FALSE
T Cell	DNT	DNT/27+28+31+95-127-RA+	195	-0.606	0.234	0.01	NA	FALSE
T Cell	CD4	CD4/27+28+31-57-95+127-RA-	220	0.114	0.073	0.119	NA	FALSE
T Cell	DNT	DNT/28-31-57+95-127-RA+	190	-0.038	0.34	0.912	NA	FALSE
T Cell	DNT	DNT/27-31-57+95-127-RA+	188	0.071	0.357	0.842	NA	FALSE
T Cell	DNT	DNT/31-57+95-127-RA+	190	-0.042	0.34	0.901	NA	FALSE
T Cell	CD8	CD8/28-57+127-	221	-0.286	0.198	0.15	NA	FALSE
T Cell	DNT	DNT/27-28-57+95-127-RA+	194	0.011	0.337	0.974	NA	FALSE
T Cell	CD4	CD4/27-28-57-95+127-RA-	222	-0.155	0.375	0.679	NA	FALSE
T Cell	DNT	DNT/28-57+95-127-RA+	196	-0.135	0.32	0.673	NA	FALSE
T Cell	DNT	DNT/27-57+95-127-RA+	194	0.002	0.335	0.995	NA	FALSE
T Cell	DNT	DNT/57+95-127-RA+	196	-0.156	0.314	0.619	NA	FALSE
T Cell	CD8	CD8/27+28-57+127-	221	-0.409	0.241	0.091	NA	FALSE
T Cell	CD4	CD4/28-57-95+127-RA-	222	-0.081	0.296	0.784	NA	FALSE
T Cell	CD8	CD8/27-57+127-	222	-0.272	0.223	0.226	NA	FALSE
T Cell	DNT	DNT/27-28-31-57-127-RA+	197	0.04	0.222	0.859	NA	FALSE
T Cell	DNT	DNT/28-31-57-127-RA+	197	-0.039	0.196	0.842	NA	FALSE
T Cell	DNT	DNT/27+28-31-57-127-RA+	196	-0.271	0.187	0.148	NA	FALSE
T Cell	DNT	DNT/27-31-57-127-RA+	197	0.023	0.214	0.916	NA	FALSE
T Cell	DNT	DNT/31-57-127-RA+	197	-0.09	0.176	0.609	NA	FALSE
T Cell	DNT	DNT/27+31-57-127-RA+	197	-0.346	0.155	0.027	NA	FALSE
T Cell	DNT	DNT/27-28+31-57-127-RA+	196	-0.085	0.203	0.674	NA	FALSE
T Cell	CD8	CD8/57+127-	223	-0.358	0.188	0.058	NA	FALSE
T Cell	DNT	DNT/28+31-57-127-RA+	196	-0.198	0.156	0.206	NA	FALSE
T Cell	DNT	DNT/27+28+31-57-127-RA+	195	-0.214	0.162	0.187	NA	FALSE
T Cell	DNT	DNT/27-28-57-127-RA+	197	0.013	0.176	0.942	NA	FALSE
T Cell	DNT	DNT/28-57-127-RA+	197	-0.023	0.154	0.883	NA	FALSE
T Cell	DNT	DNT/27+28-57-127-RA+	197	-0.225	0.153	0.143	NA	FALSE
T Cell	DNT	DNT/27-57-127-RA+	197	-0.021	0.167	0.901	NA	FALSE
T Cell	CD4	CD4/27-57-95+127-RA-	223	0.036	0.131	0.782	NA	FALSE
T Cell	DNT	DNT/57-127-RA+	197	-0.166	0.121	0.172	NA	FALSE
T Cell	DNT	DNT/27+57-127-RA+	197	-0.329	0.115	4.71e-03	NA	FALSE
T Cell	DNT	DNT/27-28+57-127-RA+	197	-0.251	0.17	0.141	NA	FALSE
T Cell	CD8	CD8/27+57+127-	221	-0.276	0.214	0.198	NA	FALSE
T Cell	DNT	DNT/28+57-127-RA+	197	-0.301	0.134	0.026	NA	FALSE
T Cell	DNT	DNT/27+28+57-127-RA+	197	-0.318	0.14	0.024	NA	FALSE
T Cell	DNT	DNT/27-28-31+57-127-RA+	197	-0.062	0.167	0.709	NA	FALSE
T Cell	DNT	DNT/28-31+57-127-RA+	197	-0.076	0.15	0.614	NA	FALSE
T Cell	DNT	DNT/27+28-31+57-127-RA+	196	-0.193	0.161	0.233	NA	FALSE
T Cell	DNT	DNT/27-31+57-127-RA+	197	-0.105	0.159	0.507	NA	FALSE
T Cell	DNT	DNT/31+57-127-RA+	197	-0.235	0.125	0.062	NA	FALSE
T Cell	CD4	CD4/57-95+127-RA-	220	0.1	0.074	0.177	NA	FALSE
T Cell	DNT	DNT/27+31+57-127-RA+	197	-0.336	0.136	0.014	NA	FALSE
T Cell	DNT	DNT/27-28+31+57-127-RA+	196	-0.307	0.176	0.083	NA	FALSE
T Cell	CD8	CD8/27-28+57+127-	217	-0.327	0.182	0.074	NA	FALSE
T Cell	DNT	DNT/28+31+57-127-RA+	197	-0.35	0.152	0.023	NA	FALSE
T Cell	DNT	DNT/27+28+31+57-127-RA+	197	-0.359	0.159	0.025	NA	FALSE
T Cell	DNT	DNT/27-28-31-127-RA+	197	0.021	0.239	0.929	NA	FALSE
T Cell	DNT	DNT/28-31-127-RA+	197	-0.048	0.212	0.821	NA	FALSE
T Cell	DNT	DNT/27+28-31-127-RA+	197	-0.385	0.194	0.048	NA	FALSE
T Cell	DNT	DNT/27-31-127-RA+	197	0.008	0.231	0.972	NA	FALSE
T Cell	DNT	DNT/31-127-RA+	197	-0.087	0.191	0.649	NA	FALSE
T Cell	DNT	DNT/27+31-127-RA+	197	-0.357	0.162	0.029	NA	FALSE
T Cell	CD4	CD4/27+57-95+127-RA-	220	0.113	0.073	0.123	NA	FALSE
T Cell	DNT	DNT/27-28+31-127-RA+	196	-0.099	0.202	0.625	NA	FALSE
T Cell	CD8	CD8/28+57+127-	220	-0.144	0.156	0.357	NA	FALSE
T Cell	DNT	DNT/28+31-127-RA+	196	-0.202	0.157	0.198	NA	FALSE
T Cell	DNT	DNT/27+28+31-127-RA+	195	-0.216	0.164	0.188	NA	FALSE
T Cell	DNT	DNT/27-28-127-RA+	197	0.024	0.192	0.901	NA	FALSE
T Cell	DNT	DNT/28-127-RA+	197	-0.008	0.167	0.96	NA	FALSE
T Cell	DNT	DNT/27+28-127-RA+	197	-0.234	0.16	0.144	NA	FALSE
T Cell	DNT	DNT/27-127-RA+	197	-0.005	0.183	0.978	NA	FALSE
T Cell	DNT	DNT/127-RA+	197	-0.137	0.129	0.292	NA	FALSE
T Cell	DNT	DNT/27+127-RA+	197	-0.327	0.114	4.53e-03	NA	FALSE
T Cell	DNT	DNT/27-28+127-RA+	196	-0.251	0.167	0.133	NA	FALSE
T Cell	CD4	CD4/27-28+57-95+127-RA-	222	0.051	0.116	0.664	NA	FALSE
T Cell	CD4	CD4/31-57-95-127-244-RA-	220	0.104	0.114	0.364	NA	FALSE
T Cell	DNT	DNT/28+127-RA+	197	-0.291	0.133	0.03	NA	FALSE
T Cell	DNT	DNT/27+28+127-RA+	197	-0.307	0.139	0.028	NA	FALSE
T Cell	DNT	DNT/27-28-31+127-RA+	197	-0.032	0.174	0.852	NA	FALSE
T Cell	DNT	DNT/28-31+127-RA+	197	-0.044	0.155	0.775	NA	FALSE
T Cell	DNT	DNT/27+28-31+127-RA+	196	-0.199	0.166	0.232	NA	FALSE
T Cell	DNT	DNT/27-31+127-RA+	197	-0.069	0.165	0.677	NA	FALSE
T Cell	DNT	DNT/31+127-RA+	197	-0.206	0.125	0.1	NA	FALSE
T Cell	DNT	DNT/27+31+127-RA+	197	-0.33	0.131	0.012	NA	FALSE
T Cell	DNT	DNT/27-28+31+127-RA+	196	-0.31	0.176	0.079	NA	FALSE
T Cell	DNT	DNT/28+31+127-RA+	197	-0.335	0.15	0.026	NA	FALSE
T Cell	CD8	CD8/27+28+57+127-	218	-0.039	0.195	0.84	NA	FALSE
T Cell	CD4	CD4/28+57-95+127-RA-	219	0.114	0.071	0.109	NA	FALSE
T Cell	DNT	DNT/27+28+31+127-RA+	197	-0.345	0.156	0.028	NA	FALSE
T Cell	DNT	DNT/27-28-31-57+127-RA+	196	-0.143	0.353	0.687	NA	FALSE
T Cell	DNT	DNT/28-31-57+127-RA+	197	-0.345	0.32	0.282	NA	FALSE
T Cell	DNT	DNT/27-31-57+127-RA+	196	-0.152	0.35	0.664	NA	FALSE
T Cell	DNT	DNT/31-57+127-RA+	197	-0.371	0.311	0.234	NA	FALSE
T Cell	CD8	CD8/27-28-31+57+127-	222	-0.611	0.234	9.53e-03	NA	FALSE
T Cell	CD4	CD4/27+28+57-95+127-RA-	220	0.112	0.073	0.126	NA	FALSE
T Cell	DNT	DNT/27-28-57+127-RA+	197	-0.271	0.328	0.409	NA	FALSE
T Cell	DNT	DNT/28-57+127-RA+	197	-0.284	0.291	0.33	NA	FALSE
T Cell	DNT	DNT/27+28-57+127-RA+	192	-0.439	0.269	0.104	NA	FALSE
T Cell	DNT	DNT/27-57+127-RA+	197	-0.288	0.32	0.369	NA	FALSE
T Cell	DNT	DNT/57+127-RA+	197	-0.212	0.228	0.353	NA	FALSE
T Cell	DNT	DNT/27+57+127-RA+	197	-0.31	0.182	0.089	NA	FALSE
T Cell	DNT	DNT/28+57+127-RA+	196	-0.321	0.184	0.083	NA	FALSE
T Cell	CD8	CD8/28-31+57+127-	222	-0.599	0.204	3.7e-03	NA	FALSE
T Cell	DNT	DNT/27+28+57+127-RA+	196	-0.353	0.19	0.065	NA	FALSE
T Cell	DNT	DNT/27-28-31+57+127-RA+	194	-0.152	0.324	0.639	NA	FALSE
T Cell	CD8	CD8/27-28+31-57-95-127+244-RA+	215	0.485	0.283	0.088	NA	FALSE
T Cell	DNT	DNT/28-31+57+127-RA+	196	-0.308	0.289	0.288	NA	FALSE
T Cell	DNT	DNT/27-31+57+127-RA+	195	-0.152	0.315	0.629	NA	FALSE
T Cell	DNT	DNT/31+57+127-RA+	197	-0.247	0.198	0.215	NA	FALSE
T Cell	DNT	DNT/27+31+57+127-RA+	197	-0.314	0.175	0.074	NA	FALSE
T Cell	CD8	CD8/27+28-31+57+127-	220	-0.509	0.245	0.039	NA	FALSE
T Cell	DNT	DNT/28+31+57+127-RA+	197	-0.294	0.193	0.13	NA	FALSE
T Cell	DNT	DNT/27+28+31+57+127-RA+	196	-0.341	0.192	0.078	NA	FALSE
T Cell	DNT	DNT/27-28-31-57-95+127-RA+	197	-0.048	0.277	0.862	NA	FALSE
T Cell	DNT	DNT/28-31-57-95+127-RA+	197	-0.132	0.234	0.575	NA	FALSE
T Cell	DNT	DNT/27+28-31-57-95+127-RA+	197	-0.317	0.208	0.129	NA	FALSE
T Cell	DNT	DNT/27-31-57-95+127-RA+	197	-0.069	0.263	0.793	NA	FALSE
T Cell	DNT	DNT/31-57-95+127-RA+	197	-0.152	0.207	0.463	NA	FALSE
T Cell	DNT	DNT/27+31-57-95+127-RA+	197	-0.293	0.182	0.11	NA	FALSE
T Cell	DNT	DNT/27-28+31-57-95+127-RA+	188	-0.138	0.211	0.514	NA	FALSE
T Cell	CD8	CD8/27-31+57+127-	222	-0.585	0.223	9.38e-03	NA	FALSE
T Cell	DNT	DNT/28+31-57-95+127-RA+	194	-0.254	0.185	0.17	NA	FALSE
T Cell	DNT	DNT/27+28+31-57-95+127-RA+	194	-0.326	0.197	0.1	NA	FALSE
T Cell	DNT	DNT/27-28-57-95+127-RA+	197	-0.11	0.262	0.675	NA	FALSE
T Cell	DNT	DNT/28-57-95+127-RA+	197	-0.17	0.214	0.427	NA	FALSE
T Cell	DNT	DNT/27+28-57-95+127-RA+	196	-0.336	0.177	0.059	NA	FALSE
T Cell	DNT	DNT/27-57-95+127-RA+	197	-0.151	0.244	0.537	NA	FALSE
T Cell	DNT	DNT/57-95+127-RA+	197	-0.278	0.146	0.058	NA	FALSE
T Cell	DNT	DNT/27+57-95+127-RA+	197	-0.357	0.123	4.28e-03	NA	FALSE
T Cell	DNT	DNT/27-28+57-95+127-RA+	196	-0.3	0.206	0.146	NA	FALSE
T Cell	CD8	CD8/31+57+127-	222	-0.533	0.184	4.13e-03	NA	FALSE
T Cell	DNT	DNT/28+57-95+127-RA+	197	-0.293	0.138	0.035	NA	FALSE
T Cell	DNT	DNT/27+28+57-95+127-RA+	197	-0.303	0.143	0.036	NA	FALSE
T Cell	DNT	DNT/27-28-31+57-95+127-RA+	197	-0.22	0.27	0.417	NA	FALSE
T Cell	DNT	DNT/28-31+57-95+127-RA+	197	-0.273	0.221	0.218	NA	FALSE
T Cell	DNT	DNT/27+28-31+57-95+127-RA+	195	-0.417	0.188	0.028	NA	FALSE
T Cell	DNT	DNT/27-31+57-95+127-RA+	197	-0.284	0.247	0.253	NA	FALSE
T Cell	CD4	CD4/27-31+57-95+127-RA-	222	0.058	0.146	0.691	NA	FALSE
T Cell	DNT	DNT/31+57-95+127-RA+	197	-0.37	0.149	0.014	NA	FALSE
T Cell	DNT	DNT/27+31+57-95+127-RA+	197	-0.371	0.139	8.36e-03	NA	FALSE
T Cell	DNT	DNT/27-28+31+57-95+127-RA+	193	-0.43	0.224	0.056	NA	FALSE
T Cell	CD8	CD8/27+31+57+127-	221	-0.295	0.215	0.171	NA	FALSE
T Cell	DNT	DNT/28+31+57-95+127-RA+	197	-0.331	0.154	0.033	NA	FALSE
T Cell	DNT	DNT/27+28+31+57-95+127-RA+	197	-0.329	0.158	0.039	NA	FALSE
T Cell	DNT	DNT/27-28-31-95+127-RA+	197	-0.064	0.295	0.83	NA	FALSE
T Cell	DNT	DNT/28-31-95+127-RA+	197	-0.144	0.252	0.569	NA	FALSE
T Cell	DNT	DNT/27+28-31-95+127-RA+	197	-0.332	0.217	0.127	NA	FALSE
T Cell	DNT	DNT/27-31-95+127-RA+	197	-0.082	0.282	0.771	NA	FALSE
T Cell	DNT	DNT/31-95+127-RA+	197	-0.158	0.225	0.483	NA	FALSE
T Cell	CD4	CD4/31+57-95+127-RA-	221	0.098	0.103	0.343	NA	FALSE
T Cell	DNT	DNT/27+31-95+127-RA+	197	-0.313	0.19	0.101	NA	FALSE
T Cell	DNT	DNT/27-28+31-95+127-RA+	188	-0.153	0.213	0.472	NA	FALSE
T Cell	DNT	DNT/28+31-95+127-RA+	194	-0.263	0.187	0.16	NA	FALSE
T Cell	DNT	DNT/27+28+31-95+127-RA+	194	-0.337	0.2	0.094	NA	FALSE
T Cell	DNT	DNT/27-28-95+127-RA+	197	-0.1	0.279	0.72	NA	FALSE
T Cell	DNT	DNT/28-95+127-RA+	197	-0.151	0.229	0.508	NA	FALSE
T Cell	DNT	DNT/27+28-95+127-RA+	197	-0.316	0.186	0.09	NA	FALSE
T Cell	DNT	DNT/27-95+127-RA+	197	-0.13	0.262	0.62	NA	FALSE
T Cell	DNT	DNT/95+127-RA+	197	-0.231	0.156	0.139	NA	FALSE
T Cell	DNT	DNT/27+95+127-RA+	197	-0.346	0.123	5.35e-03	NA	FALSE
T Cell	CD4	CD4/27+31+57-95+127-RA-	221	0.104	0.106	0.328	NA	FALSE
T Cell	DNT	DNT/27-28+95+127-RA+	195	-0.308	0.202	0.13	NA	FALSE
T Cell	CD8	CD8/28+31+57+127-	223	-0.134	0.179	0.453	NA	FALSE
T Cell	DNT	DNT/28+95+127-RA+	197	-0.282	0.138	0.042	NA	FALSE
T Cell	DNT	DNT/27+28+95+127-RA+	197	-0.293	0.143	0.041	NA	FALSE
T Cell	DNT	DNT/27-28-31+95+127-RA+	197	-0.177	0.283	0.532	NA	FALSE
T Cell	DNT	DNT/28-31+95+127-RA+	197	-0.219	0.23	0.343	NA	FALSE
T Cell	DNT	DNT/27+28-31+95+127-RA+	196	-0.373	0.194	0.056	NA	FALSE
T Cell	DNT	DNT/27-31+95+127-RA+	196	-0.251	0.254	0.326	NA	FALSE
T Cell	DNT	DNT/31+95+127-RA+	197	-0.315	0.149	0.036	NA	FALSE
T Cell	DNT	DNT/27+31+95+127-RA+	197	-0.358	0.134	8.4e-03	NA	FALSE
T Cell	DNT	DNT/27-28+31+95+127-RA+	194	-0.437	0.225	0.054	NA	FALSE
T Cell	CD4	CD4/27-28+31+57-95+127-RA-	222	0.016	0.135	0.905	NA	FALSE
T Cell	CD8	CD8/27+28+31+57+127-	218	-0.047	0.2	0.814	NA	FALSE
T Cell	DNT	DNT/28+31+95+127-RA+	197	-0.318	0.151	0.037	NA	FALSE
T Cell	DNT	DNT/27+28+31+95+127-RA+	197	-0.319	0.155	0.041	NA	FALSE
T Cell	DNT	DNT/27-28-31-57+95+127-RA+	194	-0.091	0.376	0.81	NA	FALSE
T Cell	DNT	DNT/28-31-57+95+127-RA+	194	-0.179	0.338	0.596	NA	FALSE
T Cell	DNT	DNT/27-31-57+95+127-RA+	194	-0.101	0.373	0.786	NA	FALSE
T Cell	DNT	DNT/31-57+95+127-RA+	194	-0.216	0.325	0.508	NA	FALSE
T Cell	CD4	CD4/27+31-57-95-127-244-RA-	220	0.123	0.116	0.289	NA	FALSE
T Cell	CD4	CD4/28+31+57-95+127-RA-	222	0.1	0.105	0.34	NA	FALSE
T Cell	DNT	DNT/27-28-57+95+127-RA+	197	-0.235	0.362	0.517	NA	FALSE
T Cell	DNT	DNT/28-57+95+127-RA+	197	-0.266	0.316	0.401	NA	FALSE
T Cell	DNT	DNT/27-57+95+127-RA+	197	-0.242	0.35	0.49	NA	FALSE
T Cell	DNT	DNT/57+95+127-RA+	197	-0.191	0.232	0.412	NA	FALSE
T Cell	DNT	DNT/27+57+95+127-RA+	197	-0.25	0.186	0.182	NA	FALSE
T Cell	DNT	DNT/28+57+95+127-RA+	197	-0.296	0.194	0.128	NA	FALSE
T Cell	CD8	CD8/27-28-31-57-95+127-	223	-0.083	0.238	0.728	NA	FALSE
T Cell	DNT	DNT/27+28+57+95+127-RA+	196	-0.346	0.194	0.075	NA	FALSE
T Cell	CD4	CD4/27+28+31+57-95+127-RA-	221	0.101	0.106	0.345	NA	FALSE
T Cell	DNT	DNT/27-28-31+57+95+127-RA+	193	-0.174	0.365	0.634	NA	FALSE
T Cell	DNT	DNT/28-31+57+95+127-RA+	194	-0.318	0.305	0.298	NA	FALSE
T Cell	DNT	DNT/27-31+57+95+127-RA+	193	-0.174	0.344	0.614	NA	FALSE
T Cell	DNT	DNT/31+57+95+127-RA+	197	-0.227	0.203	0.264	NA	FALSE
T Cell	DNT	DNT/27+31+57+95+127-RA+	197	-0.274	0.18	0.13	NA	FALSE
T Cell	DNT	DNT/28+31+57+95+127-RA+	197	-0.281	0.197	0.156	NA	FALSE
T Cell	CD8	CD8/28-31-57-95+127-	222	-0.107	0.203	0.597	NA	FALSE
T Cell	DNT	DNT/27+28+31+57+95+127-RA+	196	-0.334	0.196	0.089	NA	FALSE
T Cell	DNT	DNT/27-28-31-57-95-RA+	196	-0.023	0.185	0.901	NA	FALSE
T Cell	CD4	CD4/27-28-31-95+127-RA-	222	-0.354	0.426	0.407	NA	FALSE
T Cell	DNT	DNT/28-31-57-95-RA+	197	-0.045	0.169	0.791	NA	FALSE
T Cell	DNT	DNT/27+28-31-57-95-RA+	195	-0.21	0.189	0.267	NA	FALSE
T Cell	DNT	DNT/27-31-57-95-RA+	197	-0.026	0.172	0.879	NA	FALSE
T Cell	DNT	DNT/31-57-95-RA+	196	0.017	0.127	0.891	NA	FALSE
T Cell	DNT	DNT/27+31-57-95-RA+	196	0.005	0.166	0.978	NA	FALSE
T Cell	DNT	DNT/27-28+31-57-95-RA+	197	-0.051	0.185	0.782	NA	FALSE
T Cell	DNT	DNT/28+31-57-95-RA+	196	0.067	0.178	0.709	NA	FALSE
T Cell	CD8	CD8/27+28-31-57-95+127-	223	-0.174	0.216	0.421	NA	FALSE
T Cell	DNT	DNT/27+28+31-57-95-RA+	197	0.095	0.194	0.623	NA	FALSE
T Cell	DNT	DNT/27-28-57-95-RA+	197	0.051	0.14	0.715	NA	FALSE
T Cell	DNT	DNT/28-57-95-RA+	196	0.016	0.127	0.902	NA	FALSE
T Cell	CD4	CD4/28-31-95+127-RA-	222	-0.252	0.346	0.468	NA	FALSE
T Cell	DNT	DNT/27+28-57-95-RA+	196	-0.071	0.186	0.703	NA	FALSE
T Cell	DNT	DNT/27-57-95-RA+	197	-0.007	0.13	0.96	NA	FALSE
T Cell	DNT	DNT/57-95-RA+	197	-0.081	0.127	0.522	NA	FALSE
T Cell	DNT	DNT/27+57-95-RA+	197	-0.135	0.176	0.443	NA	FALSE
T Cell	DNT	DNT/27-28+57-95-RA+	197	-0.18	0.172	0.296	NA	FALSE
T Cell	CD8	CD8/27-31-57-95+127-	223	0.052	0.187	0.783	NA	FALSE
T Cell	DNT	DNT/28+57-95-RA+	197	-0.101	0.183	0.583	NA	FALSE
T Cell	DNT	DNT/27+28+57-95-RA+	197	-0.099	0.195	0.612	NA	FALSE
T Cell	DNT	DNT/27-28-31+57-95-RA+	197	0.061	0.141	0.666	NA	FALSE
T Cell	DNT	DNT/28-31+57-95-RA+	197	0.063	0.142	0.657	NA	FALSE
T Cell	DNT	DNT/27+28-31+57-95-RA+	197	0	0.224	0.999	NA	FALSE
T Cell	DNT	DNT/27-31+57-95-RA+	197	-0.019	0.133	0.884	NA	FALSE
T Cell	DNT	DNT/31+57-95-RA+	197	-0.174	0.159	0.275	NA	FALSE
T Cell	DNT	DNT/27+31+57-95-RA+	197	-0.236	0.214	0.27	NA	FALSE
T Cell	DNT	DNT/27-28+31+57-95-RA+	196	-0.26	0.19	0.173	NA	FALSE
T Cell	CD8	CD8/31-57-95+127-	222	0.109	0.142	0.446	NA	FALSE
T Cell	DNT	DNT/28+31+57-95-RA+	197	-0.245	0.215	0.255	NA	FALSE
T Cell	DNT	DNT/27+28+31+57-95-RA+	197	-0.249	0.226	0.273	NA	FALSE
T Cell	DNT	DNT/27-28-31-95-RA+	197	-0.017	0.198	0.933	NA	FALSE
T Cell	DNT	DNT/28-31-95-RA+	197	-0.042	0.173	0.807	NA	FALSE
T Cell	DNT	DNT/27+28-31-95-RA+	195	-0.236	0.191	0.218	NA	FALSE
T Cell	DNT	DNT/27-31-95-RA+	197	-0.03	0.18	0.867	NA	FALSE
T Cell	CD4	CD4/27-31-95+127-RA-	223	0.009	0.146	0.949	NA	FALSE
T Cell	DNT	DNT/31-95-RA+	196	0.022	0.125	0.861	NA	FALSE
T Cell	DNT	DNT/27+31-95-RA+	196	-0.007	0.165	0.966	NA	FALSE
T Cell	DNT	DNT/27-28+31-95-RA+	197	-0.059	0.184	0.75	NA	FALSE
T Cell	CD8	CD8/27+31-57-95+127-	222	0.218	0.144	0.133	NA	FALSE
T Cell	DNT	DNT/28+31-95-RA+	196	0.066	0.178	0.713	NA	FALSE
T Cell	DNT	DNT/27+28+31-95-RA+	197	0.095	0.194	0.625	NA	FALSE
T Cell	DNT	DNT/27-28-95-RA+	197	0.057	0.147	0.7	NA	FALSE
T Cell	DNT	DNT/28-95-RA+	197	0.038	0.133	0.776	NA	FALSE
T Cell	DNT	DNT/27+28-95-RA+	196	-0.09	0.187	0.63	NA	FALSE
T Cell	DNT	DNT/27-95-RA+	197	0.007	0.136	0.961	NA	FALSE
T Cell	DNT	DNT/95-RA+	197	-0.073	0.124	0.557	NA	FALSE
T Cell	CD4	CD4/31-95+127-RA-	220	0.09	0.079	0.255	NA	FALSE
T Cell	DNT	DNT/27+95-RA+	197	-0.146	0.175	0.405	NA	FALSE
T Cell	DNT	DNT/27-28+95-RA+	197	-0.185	0.172	0.283	NA	FALSE
T Cell	CD8	CD8/27-28+31-57-95+127-	223	0.38	0.153	0.014	NA	FALSE
T Cell	DNT	DNT/28+95-RA+	197	-0.102	0.183	0.58	NA	FALSE
T Cell	DNT	DNT/27+28+95-RA+	197	-0.1	0.195	0.61	NA	FALSE
T Cell	DNT	DNT/27-28-31+95-RA+	197	0.066	0.139	0.639	NA	FALSE
T Cell	DNT	DNT/28-31+95-RA+	197	0.073	0.139	0.602	NA	FALSE
T Cell	DNT	DNT/27+28-31+95-RA+	197	-0.02	0.225	0.928	NA	FALSE
T Cell	DNT	DNT/27-31+95-RA+	197	-0.006	0.132	0.965	NA	FALSE
T Cell	DNT	DNT/31+95-RA+	197	-0.166	0.156	0.289	NA	FALSE
T Cell	DNT	DNT/27+31+95-RA+	197	-0.244	0.212	0.252	NA	FALSE
T Cell	CD4	CD4/27+31-95+127-RA-	220	0.114	0.073	0.119	NA	FALSE
T Cell	DNT	DNT/27-28+31+95-RA+	196	-0.263	0.189	0.167	NA	FALSE
T Cell	CD8	CD8/28+31-57-95+127-	222	0.363	0.13	5.71e-03	NA	FALSE
T Cell	DNT	DNT/28+31+95-RA+	197	-0.245	0.215	0.254	NA	FALSE
T Cell	DNT	DNT/27+28+31+95-RA+	197	-0.249	0.226	0.273	NA	FALSE
T Cell	DNT	DNT/27-28-31-57+95-RA+	188	0.034	0.343	0.921	NA	FALSE
T Cell	DNT	DNT/28-31-57+95-RA+	190	-0.108	0.329	0.743	NA	FALSE
T Cell	DNT	DNT/27-31-57+95-RA+	188	0.03	0.341	0.93	NA	FALSE
T Cell	DNT	DNT/31-57+95-RA+	190	-0.116	0.327	0.723	NA	FALSE
T Cell	CD4	CD4/27-28+31-95+127-RA-	222	0.046	0.118	0.7	NA	FALSE
T Cell	CD8	CD8/27+28+31-57-95+127-	222	0.342	0.137	0.014	NA	FALSE
T Cell	DNT	DNT/27-28-57+95-RA+	194	-0.08	0.328	0.807	NA	FALSE
T Cell	DNT	DNT/28-57+95-RA+	196	-0.234	0.316	0.46	NA	FALSE
T Cell	DNT	DNT/27-57+95-RA+	194	-0.089	0.326	0.785	NA	FALSE
T Cell	DNT	DNT/57+95-RA+	196	-0.259	0.31	0.404	NA	FALSE
T Cell	CD8	CD8/27-28-57-95+127-	223	-0.222	0.215	0.304	NA	FALSE
T Cell	CD4	CD4/28+31-95+127-RA-	219	0.115	0.071	0.11	NA	FALSE
T Cell	DNT	DNT/31+57+95-RA+	191	-0.348	0.29	0.232	NA	FALSE
T Cell	CD4	CD4/28+31-57-95-127-244-RA-	220	0.098	0.111	0.378	NA	FALSE
T Cell	CD4	CD4/27+28+31-95+127-RA-	220	0.114	0.073	0.121	NA	FALSE
T Cell	DNT	DNT/27-28-31-57-RA+	197	-0.134	0.196	0.495	NA	FALSE
T Cell	DNT	DNT/28-31-57-RA+	197	-0.17	0.156	0.278	NA	FALSE
T Cell	DNT	DNT/27+28-31-57-RA+	197	-0.267	0.166	0.108	NA	FALSE
T Cell	DNT	DNT/27-31-57-RA+	197	-0.186	0.164	0.259	NA	FALSE
T Cell	DNT	DNT/31-57-RA+	194	0.012	0.087	0.886	NA	FALSE
T Cell	DNT	DNT/27+31-57-RA+	197	-0.068	0.128	0.596	NA	FALSE
T Cell	DNT	DNT/27-28+31-57-RA+	197	-0.144	0.171	0.401	NA	FALSE
T Cell	DNT	DNT/28+31-57-RA+	196	-0.016	0.131	0.903	NA	FALSE
T Cell	CD8	CD8/28-57-95+127-	223	-0.235	0.175	0.182	NA	FALSE
T Cell	DNT	DNT/27+28+31-57-RA+	196	0.003	0.144	0.984	NA	FALSE
T Cell	DNT	DNT/27-28-57-RA+	197	-0.103	0.158	0.516	NA	FALSE
T Cell	CD4	CD4/27-28-95+127-RA-	222	-0.278	0.417	0.506	NA	FALSE
T Cell	DNT	DNT/28-57-RA+	195	-0.144	0.115	0.212	NA	FALSE
T Cell	DNT	DNT/27+28-57-RA+	197	-0.164	0.145	0.26	NA	FALSE
T Cell	DNT	DNT/27-57-RA+	197	-0.154	0.132	0.245	NA	FALSE
T Cell	DNT	DNT/57-RA+	195	-0.121	0.076	0.113	NA	FALSE
T Cell	DNT	DNT/27+57-RA+	197	-0.169	0.121	0.164	NA	FALSE
T Cell	DNT	DNT/27-28+57-RA+	196	-0.211	0.15	0.162	NA	FALSE
T Cell	DNT	DNT/28+57-RA+	196	-0.128	0.123	0.299	NA	FALSE
T Cell	CD8	CD8/27+28-57-95+127-	222	-0.275	0.173	0.113	NA	FALSE
T Cell	DNT	DNT/27+28+57-RA+	196	-0.137	0.135	0.313	NA	FALSE
T Cell	DNT	DNT/27-28-31+57-RA+	197	-0.124	0.155	0.425	NA	FALSE
T Cell	DNT	DNT/28-31+57-RA+	197	-0.111	0.132	0.403	NA	FALSE
T Cell	CD4	CD4/28-95+127-RA-	222	-0.181	0.338	0.593	NA	FALSE
T Cell	DNT	DNT/27+28-31+57-RA+	196	-0.121	0.163	0.46	NA	FALSE
T Cell	DNT	DNT/27-31+57-RA+	197	-0.166	0.131	0.207	NA	FALSE
T Cell	DNT	DNT/31+57-RA+	197	-0.211	0.112	0.062	NA	FALSE
T Cell	DNT	DNT/27+31+57-RA+	196	-0.227	0.143	0.116	NA	FALSE
T Cell	DNT	DNT/27-28+31+57-RA+	196	-0.242	0.161	0.135	NA	FALSE
T Cell	DNT	DNT/28+31+57-RA+	197	-0.196	0.148	0.186	NA	FALSE
T Cell	CD8	CD8/27-57-95+127-	223	-0.081	0.169	0.635	NA	FALSE
T Cell	DNT	DNT/27+28+31+57-RA+	197	-0.207	0.16	0.197	NA	FALSE
T Cell	DNT	DNT/27-28-31-RA+	197	-0.129	0.214	0.548	NA	FALSE
T Cell	DNT	DNT/28-31-RA+	197	-0.159	0.169	0.348	NA	FALSE
T Cell	DNT	DNT/27+28-31-RA+	197	-0.287	0.169	0.092	NA	FALSE
T Cell	CD8	CD8/27+28-31-57-95-127+244-RA+	212	0.327	0.256	0.203	NA	FALSE
T Cell	DNT	DNT/27-31-RA+	197	-0.174	0.179	0.332	NA	FALSE
T Cell	DNT	DNT/31-RA+	195	-0.036	0.087	0.677	NA	FALSE
T Cell	DNT	DNT/27+31-RA+	197	-0.076	0.127	0.548	NA	FALSE
T Cell	DNT	DNT/27-28+31-RA+	197	-0.146	0.171	0.394	NA	FALSE
T Cell	CD8	CD8/57-95+127-	223	-0.014	0.114	0.9	NA	FALSE
T Cell	DNT	DNT/28+31-RA+	196	-0.015	0.13	0.911	NA	FALSE
T Cell	DNT	DNT/27+28+31-RA+	196	0.005	0.143	0.97	NA	FALSE
T Cell	DNT	DNT/27-28-RA+	197	-0.081	0.175	0.644	NA	FALSE
T Cell	DNT	DNT/28-RA+	196	-0.107	0.129	0.405	NA	FALSE
T Cell	DNT	DNT/27+28-RA+	197	-0.175	0.144	0.226	NA	FALSE
T Cell	DNT	DNT/27-RA+	197	-0.129	0.146	0.378	NA	FALSE
T Cell	CD4	CD4/27-95+127-RA-	223	0.005	0.146	0.972	NA	FALSE
T Cell	DNT	DNT/RA+	195	-0.148	0.07	0.036	NA	FALSE
T Cell	DNT	DNT/27+RA+	197	-0.175	0.117	0.137	NA	FALSE
T Cell	DNT	DNT/27-28+RA+	196	-0.213	0.15	0.157	NA	FALSE
T Cell	CD8	CD8/27+57-95+127-	222	0.056	0.115	0.625	NA	FALSE
T Cell	DNT	DNT/28+RA+	196	-0.127	0.121	0.294	NA	FALSE
T Cell	DNT	DNT/27+28+RA+	196	-0.136	0.133	0.307	NA	FALSE
T Cell	DNT	DNT/27-28-31+RA+	197	-0.092	0.163	0.573	NA	FALSE
T Cell	DNT	DNT/28-31+RA+	197	-0.085	0.135	0.528	NA	FALSE
T Cell	DNT	DNT/27+28-31+RA+	196	-0.123	0.161	0.444	NA	FALSE
T Cell	DNT	DNT/27-31+RA+	197	-0.13	0.14	0.353	NA	FALSE
T Cell	DNT	DNT/31+RA+	197	-0.193	0.106	0.071	NA	FALSE
T Cell	CD4	CD4/95+127-RA-	220	0.086	0.078	0.272	NA	FALSE
T Cell	DNT	DNT/27+31+RA+	196	-0.229	0.138	0.099	NA	FALSE
T Cell	DNT	DNT/27-28+31+RA+	195	-0.256	0.156	0.103	NA	FALSE
T Cell	CD8	CD8/27-28+57-95+127-	223	0.259	0.136	0.058	NA	FALSE
T Cell	DNT	DNT/28+31+RA+	197	-0.194	0.144	0.18	NA	FALSE
T Cell	DNT	DNT/27+28+31+RA+	197	-0.207	0.155	0.185	NA	FALSE
T Cell	DNT	DNT/27-28-31-57+RA+	196	-0.195	0.339	0.566	NA	FALSE
T Cell	DNT	DNT/28-31-57+RA+	196	-0.258	0.305	0.399	NA	FALSE
T Cell	DNT	DNT/27-31-57+RA+	196	-0.197	0.333	0.555	NA	FALSE
T Cell	DNT	DNT/31-57+RA+	196	-0.249	0.293	0.397	NA	FALSE
T Cell	CD4	CD4/27+95+127-RA-	220	0.112	0.073	0.125	NA	FALSE
T Cell	CD8	CD8/28+57-95+127-	221	0.227	0.102	0.027	NA	FALSE
T Cell	DNT	DNT/27-28-57+RA+	197	-0.308	0.31	0.321	NA	FALSE
T Cell	DNT	DNT/28-57+RA+	197	-0.309	0.272	0.257	NA	FALSE
T Cell	DNT	DNT/27+28-57+RA+	193	-0.404	0.272	0.139	NA	FALSE
T Cell	DNT	DNT/27-57+RA+	197	-0.308	0.3	0.307	NA	FALSE
T Cell	DNT	DNT/57+RA+	197	-0.238	0.217	0.275	NA	FALSE
T Cell	DNT	DNT/27+57+RA+	197	-0.271	0.188	0.151	NA	FALSE
T Cell	CD4	CD4/27-28+95+127-RA-	222	0.041	0.117	0.729	NA	FALSE
T Cell	CD8	CD8/27+28+57-95+127-	222	0.182	0.114	0.113	NA	FALSE
T Cell	DNT	DNT/28+57+RA+	196	-0.224	0.177	0.206	NA	FALSE
T Cell	DNT	DNT/27+28+57+RA+	195	-0.27	0.179	0.134	NA	FALSE
T Cell	DNT	DNT/27-28-31+57+RA+	196	-0.163	0.312	0.603	NA	FALSE
T Cell	DNT	DNT/28-31+57+RA+	196	-0.318	0.269	0.238	NA	FALSE
T Cell	DNT	DNT/27-31+57+RA+	197	-0.295	0.295	0.318	NA	FALSE
T Cell	DNT	DNT/31+57+RA+	197	-0.251	0.193	0.194	NA	FALSE
T Cell	DNT	DNT/27+31+57+RA+	197	-0.272	0.177	0.126	NA	FALSE
T Cell	DNT	DNT/28+31+57+RA+	195	-0.124	0.185	0.503	NA	FALSE
T Cell	CD8	CD8/27-28-31+57-95+127-	222	-0.425	0.216	0.05	NA	FALSE
T Cell	CD4	CD4/28+95+127-RA-	219	0.111	0.071	0.12	NA	FALSE
T Cell	DNT	DNT/27+28+31+57+RA+	197	-0.281	0.192	0.145	NA	FALSE
T Cell	DNT	DNT/27-28-31-57-95+RA+	197	-0.245	0.244	0.316	NA	FALSE
T Cell	DNT	DNT/28-31-57-95+RA+	197	-0.301	0.191	0.117	NA	FALSE
T Cell	DNT	DNT/27+28-31-57-95+RA+	196	-0.415	0.182	0.024	NA	FALSE
T Cell	DNT	DNT/27-31-57-95+RA+	197	-0.271	0.192	0.158	NA	FALSE
T Cell	DNT	DNT/31-57-95+RA+	196	-0.186	0.125	0.136	NA	FALSE
T Cell	DNT	DNT/27+31-57-95+RA+	195	-0.252	0.136	0.066	NA	FALSE
T Cell	DNT	DNT/27-28+31-57-95+RA+	197	-0.144	0.197	0.465	NA	FALSE
T Cell	DNT	DNT/28+31-57-95+RA+	196	-0.15	0.145	0.303	NA	FALSE
T Cell	CD8	CD8/28-31+57-95+127-	221	-0.411	0.166	0.014	NA	FALSE
T Cell	DNT	DNT/27+28+31-57-95+RA+	196	-0.159	0.151	0.292	NA	FALSE
T Cell	CD4	CD4/27+28+95+127-RA-	220	0.112	0.073	0.126	NA	FALSE
T Cell	DNT	DNT/27-28-57-95+RA+	197	-0.245	0.232	0.292	NA	FALSE
T Cell	DNT	DNT/28-57-95+RA+	197	-0.294	0.174	0.093	NA	FALSE
T Cell	DNT	DNT/27+28-57-95+RA+	196	-0.357	0.155	0.022	NA	FALSE
T Cell	DNT	DNT/27-57-95+RA+	196	-0.276	0.178	0.122	NA	FALSE
T Cell	DNT	DNT/57-95+RA+	197	-0.244	0.101	0.016	NA	FALSE
T Cell	DNT	DNT/27+57-95+RA+	194	-0.245	0.102	0.017	NA	FALSE
T Cell	DNT	DNT/27-28+57-95+RA+	197	-0.192	0.179	0.286	NA	FALSE
T Cell	DNT	DNT/28+57-95+RA+	195	-0.176	0.116	0.131	NA	FALSE
T Cell	DNT	DNT/27+28+57-95+RA+	195	-0.183	0.121	0.134	NA	FALSE
T Cell	DNT	DNT/27-28-31+57-95+RA+	196	-0.308	0.24	0.2	NA	FALSE
T Cell	DNT	DNT/28-31+57-95+RA+	196	-0.363	0.184	0.05	NA	FALSE
T Cell	DNT	DNT/27+28-31+57-95+RA+	195	-0.306	0.167	0.068	NA	FALSE
T Cell	DNT	DNT/27-31+57-95+RA+	196	-0.294	0.193	0.129	NA	FALSE
T Cell	DNT	DNT/31+57-95+RA+	196	-0.263	0.116	0.025	NA	FALSE
T Cell	DNT	DNT/27+31+57-95+RA+	196	-0.229	0.124	0.068	NA	FALSE
T Cell	DNT	DNT/27-28+31+57-95+RA+	196	-0.254	0.19	0.182	NA	FALSE
T Cell	DNT	DNT/28+31+57-95+RA+	197	-0.169	0.135	0.212	NA	FALSE
T Cell	DNT	DNT/27+28+31+57-95+RA+	196	-0.184	0.138	0.184	NA	FALSE
T Cell	DNT	DNT/27-28-31-95+RA+	197	-0.217	0.263	0.41	NA	FALSE
T Cell	DNT	DNT/28-31-95+RA+	197	-0.283	0.211	0.18	NA	FALSE
T Cell	DNT	DNT/27+28-31-95+RA+	196	-0.423	0.191	0.028	NA	FALSE
T Cell	DNT	DNT/27-31-95+RA+	197	-0.254	0.21	0.228	NA	FALSE
T Cell	DNT	DNT/31-95+RA+	196	-0.16	0.133	0.232	NA	FALSE
T Cell	DNT	DNT/27+31-95+RA+	194	-0.272	0.134	0.044	NA	FALSE
T Cell	DNT	DNT/27-28+31-95+RA+	197	-0.146	0.197	0.458	NA	FALSE
T Cell	DNT	DNT/28+31-95+RA+	196	-0.149	0.144	0.303	NA	FALSE
T Cell	CD8	CD8/27+28-31+57-95+127-	219	-0.379	0.16	0.019	NA	FALSE
T Cell	DNT	DNT/27+28+31-95+RA+	196	-0.156	0.15	0.3	NA	FALSE
T Cell	DNT	DNT/27-28-95+RA+	197	-0.204	0.251	0.416	NA	FALSE
T Cell	DNT	DNT/28-95+RA+	197	-0.25	0.191	0.193	NA	FALSE
T Cell	DNT	DNT/27+28-95+RA+	196	-0.35	0.16	0.03	NA	FALSE
T Cell	DNT	DNT/27-95+RA+	197	-0.225	0.2	0.263	NA	FALSE
T Cell	DNT	DNT/95+RA+	196	-0.214	0.103	0.039	NA	FALSE
T Cell	DNT	DNT/27+95+RA+	194	-0.247	0.101	0.015	NA	FALSE
T Cell	DNT	DNT/27-28+95+RA+	197	-0.195	0.178	0.276	NA	FALSE
T Cell	DNT	DNT/28+95+RA+	195	-0.172	0.115	0.136	NA	FALSE
T Cell	CD8	CD8/27-31+57-95+127-	222	-0.23	0.171	0.179	NA	FALSE
T Cell	DNT	DNT/27+28+95+RA+	195	-0.18	0.12	0.137	NA	FALSE
T Cell	DNT	DNT/27-28-31+95+RA+	196	-0.255	0.253	0.315	NA	FALSE
T Cell	DNT	DNT/28-31+95+RA+	196	-0.298	0.195	0.129	NA	FALSE
T Cell	DNT	DNT/27+28-31+95+RA+	196	-0.364	0.17	0.033	NA	FALSE
T Cell	DNT	DNT/27-31+95+RA+	196	-0.246	0.205	0.231	NA	FALSE
T Cell	DPT	DPT/27-28+31-57-95+127+244-RA-	206	0.699	0.188	2.59e-04	NA	FALSE
T Cell	CD4	CD4/27-31+95+127-RA-	222	-0.004	0.163	0.979	NA	FALSE
T Cell	DNT	DNT/31+95+RA+	196	-0.232	0.115	0.044	NA	FALSE
T Cell	DNT	DNT/27+31+95+RA+	196	-0.231	0.12	0.055	NA	FALSE
T Cell	CD8	CD8/31+57-95+127-	222	-0.154	0.118	0.192	NA	FALSE
T Cell	DNT	DNT/27-28+31+95+RA+	196	-0.252	0.188	0.183	NA	FALSE
T Cell	DNT	DNT/28+31+95+RA+	197	-0.168	0.133	0.207	NA	FALSE
T Cell	DNT	DNT/27+28+31+95+RA+	196	-0.187	0.135	0.17	NA	FALSE
T Cell	DNT	DNT/27-28-31-57+95+RA+	195	-0.142	0.365	0.698	NA	FALSE
T Cell	DNT	DNT/28-31-57+95+RA+	195	-0.241	0.324	0.457	NA	FALSE
T Cell	DNT	DNT/27-31-57+95+RA+	195	-0.123	0.356	0.73	NA	FALSE
T Cell	DNT	DNT/31-57+95+RA+	195	-0.234	0.307	0.447	NA	FALSE
T Cell	CD4	CD4/31+95+127-RA-	221	0.079	0.106	0.459	NA	FALSE
T Cell	CD8	CD8/27+31+57-95+127-	221	-0.09	0.121	0.46	NA	FALSE
T Cell	DNT	DNT/27-28-57+95+RA+	197	-0.25	0.339	0.462	NA	FALSE
T Cell	DNT	DNT/28-57+95+RA+	197	-0.263	0.293	0.37	NA	FALSE
T Cell	DNT	DNT/27+28-57+95+RA+	189	-0.318	0.264	0.229	NA	FALSE
T Cell	DNT	DNT/27-57+95+RA+	197	-0.241	0.326	0.46	NA	FALSE
T Cell	DNT	DNT/57+95+RA+	197	-0.192	0.221	0.386	NA	FALSE
T Cell	DNT	DNT/27+57+95+RA+	196	-0.209	0.185	0.259	NA	FALSE
T Cell	CD4	CD4/27+31+95+127-RA-	221	0.106	0.106	0.319	NA	FALSE
T Cell	CD8	CD8/27-28+31+57-95+127-	223	0.113	0.148	0.444	NA	FALSE
T Cell	DNT	DNT/28+57+95+RA+	196	-0.194	0.182	0.288	NA	FALSE
T Cell	DNT	DNT/27+28+57+95+RA+	195	-0.253	0.184	0.17	NA	FALSE
T Cell	DNT	DNT/27-28-31+57+95+RA+	194	-0.17	0.342	0.62	NA	FALSE
T Cell	DNT	DNT/28-31+57+95+RA+	195	-0.275	0.286	0.336	NA	FALSE
T Cell	DNT	DNT/27-31+57+95+RA+	196	-0.263	0.323	0.417	NA	FALSE
T Cell	DNT	DNT/31+57+95+RA+	197	-0.212	0.199	0.286	NA	FALSE
T Cell	DNT	DNT/27+31+57+95+RA+	197	-0.219	0.181	0.227	NA	FALSE
T Cell	CD8	CD8/28+31+57-95+127-	223	0.076	0.119	0.52	NA	FALSE
T Cell	CD4	CD4/27-28+31+95+127-RA-	222	-0.004	0.136	0.975	NA	FALSE
T Cell	DNT	DNT/28+31+57+95+RA+	196	-0.233	0.189	0.219	NA	FALSE
T Cell	DNT	DNT/27+28+31+57+95+RA+	197	-0.271	0.196	0.168	NA	FALSE
T Cell	DNT	DNT/27-28-31-57-95-127+RA+	194	-0.356	0.221	0.109	NA	FALSE
T Cell	DNT	DNT/28-31-57-95-127+RA+	197	-0.109	0.193	0.575	NA	FALSE
T Cell	DNT	DNT/27+28-31-57-95-127+RA+	196	-0.07	0.21	0.739	NA	FALSE
T Cell	DNT	DNT/27-31-57-95-127+RA+	197	-0.202	0.188	0.283	NA	FALSE
T Cell	DNT	DNT/31-57-95-127+RA+	196	0.021	0.159	0.894	NA	FALSE
T Cell	DNT	DNT/27+31-57-95-127+RA+	197	0.07	0.185	0.706	NA	FALSE
T Cell	DNT	DNT/27-28+31-57-95-127+RA+	196	-0.029	0.195	0.88	NA	FALSE
T Cell	CD8	CD8/27+28+31+57-95+127-	221	0.036	0.125	0.775	NA	FALSE
T Cell	DNT	DNT/28+31-57-95-127+RA+	197	0.11	0.191	0.567	NA	FALSE
T Cell	CD4	CD4/28+31+95+127-RA-	222	0.097	0.105	0.357	NA	FALSE
T Cell	DNT	DNT/27+28+31-57-95-127+RA+	197	0.127	0.202	0.529	NA	FALSE
T Cell	DNT	DNT/27-28-57-95-127+RA+	197	-0.251	0.189	0.186	NA	FALSE
T Cell	DNT	DNT/28-57-95-127+RA+	197	-0.041	0.181	0.82	NA	FALSE
T Cell	DNT	DNT/27+28-57-95-127+RA+	196	-0.022	0.21	0.918	NA	FALSE
T Cell	DNT	DNT/27-57-95-127+RA+	197	-0.263	0.159	0.1	NA	FALSE
T Cell	DNT	DNT/57-95-127+RA+	197	-0.116	0.168	0.489	NA	FALSE
T Cell	DNT	DNT/27+57-95-127+RA+	197	-0.105	0.187	0.575	NA	FALSE
T Cell	DNT	DNT/27-28+57-95-127+RA+	196	-0.172	0.193	0.373	NA	FALSE
T Cell	CD8	CD8/27-28-31-95+127-	222	0.025	0.232	0.915	NA	FALSE
T Cell	DNT	DNT/28+57-95-127+RA+	197	-0.076	0.191	0.69	NA	FALSE
T Cell	DNT	DNT/27+28+57-95-127+RA+	197	-0.075	0.2	0.708	NA	FALSE
T Cell	CD4	CD4/27+28+31+95+127-RA-	221	0.102	0.106	0.335	NA	FALSE
T Cell	DNT	DNT/27-28-31+57-95-127+RA+	195	-0.264	0.169	0.119	NA	FALSE
T Cell	DNT	DNT/28-31+57-95-127+RA+	197	-0.008	0.212	0.968	NA	FALSE
T Cell	DNT	DNT/27+28-31+57-95-127+RA+	196	-0.005	0.252	0.983	NA	FALSE
T Cell	DNT	DNT/27-31+57-95-127+RA+	196	-0.335	0.159	0.037	NA	FALSE
T Cell	DNT	DNT/31+57-95-127+RA+	197	-0.229	0.206	0.267	NA	FALSE
T Cell	DNT	DNT/27+31+57-95-127+RA+	197	-0.221	0.225	0.326	NA	FALSE
T Cell	DNT	DNT/27-28+31+57-95-127+RA+	195	-0.334	0.226	0.141	NA	FALSE
T Cell	CD8	CD8/28-31-95+127-	222	-0.125	0.199	0.53	NA	FALSE
T Cell	DNT	DNT/28+31+57-95-127+RA+	197	-0.225	0.223	0.314	NA	FALSE
T Cell	DNT	DNT/27+28+31+57-95-127+RA+	197	-0.222	0.23	0.335	NA	FALSE
T Cell	DNT	DNT/27-28-31-95-127+RA+	194	-0.386	0.225	0.089	NA	FALSE
T Cell	DNT	DNT/28-31-95-127+RA+	197	-0.123	0.193	0.526	NA	FALSE
T Cell	DNT	DNT/27+28-31-95-127+RA+	197	-0.067	0.214	0.753	NA	FALSE
T Cell	DNT	DNT/27-31-95-127+RA+	197	-0.225	0.191	0.239	NA	FALSE
T Cell	DNT	DNT/31-95-127+RA+	196	0.014	0.157	0.928	NA	FALSE
T Cell	DNT	DNT/27+31-95-127+RA+	197	0.065	0.184	0.723	NA	FALSE
T Cell	DNT	DNT/27-28+31-95-127+RA+	196	-0.033	0.195	0.865	NA	FALSE
T Cell	CD8	CD8/27+28-31-95+127-	223	-0.196	0.219	0.372	NA	FALSE
T Cell	DNT	DNT/28+31-95-127+RA+	197	0.109	0.191	0.568	NA	FALSE
T Cell	DNT	DNT/27+28+31-95-127+RA+	197	0.127	0.202	0.53	NA	FALSE
T Cell	DNT	DNT/27-28-95-127+RA+	197	-0.26	0.195	0.184	NA	FALSE
T Cell	DNT	DNT/28-95-127+RA+	197	-0.044	0.18	0.807	NA	FALSE
T Cell	DNT	DNT/27+28-95-127+RA+	196	-0.025	0.209	0.906	NA	FALSE
T Cell	DNT	DNT/27-95-127+RA+	197	-0.257	0.162	0.114	NA	FALSE
T Cell	DNT	DNT/95-127+RA+	197	-0.118	0.167	0.478	NA	FALSE
T Cell	DNT	DNT/27+95-127+RA+	197	-0.109	0.187	0.56	NA	FALSE
T Cell	DNT	DNT/27-28+95-127+RA+	196	-0.175	0.192	0.363	NA	FALSE
T Cell	DNT	DNT/28+95-127+RA+	197	-0.077	0.191	0.688	NA	FALSE
T Cell	DNT	DNT/27+28+95-127+RA+	197	-0.075	0.2	0.707	NA	FALSE
T Cell	DNT	DNT/27-28-31+95-127+RA+	196	-0.265	0.176	0.133	NA	FALSE
T Cell	DNT	DNT/28-31+95-127+RA+	197	-0.007	0.21	0.973	NA	FALSE
T Cell	DNT	DNT/27+28-31+95-127+RA+	196	-0.007	0.251	0.978	NA	FALSE
T Cell	DNT	DNT/27-31+95-127+RA+	196	-0.324	0.159	0.044	NA	FALSE
T Cell	DNT	DNT/31+95-127+RA+	197	-0.227	0.205	0.269	NA	FALSE
T Cell	DNT	DNT/27+31+95-127+RA+	197	-0.224	0.224	0.32	NA	FALSE
T Cell	DNT	DNT/27-28+31+95-127+RA+	195	-0.34	0.225	0.132	NA	FALSE
T Cell	CD8	CD8/27-31-95+127-	223	-0.033	0.194	0.864	NA	FALSE
T Cell	DNT	DNT/28+31+95-127+RA+	197	-0.226	0.223	0.312	NA	FALSE
T Cell	DNT	DNT/27+28+31+95-127+RA+	197	-0.223	0.23	0.335	NA	FALSE
T Cell	CD8	CD8/31-95+127-	223	0.028	0.153	0.855	NA	FALSE
T Cell	CD4	CD4/31-57+95+127-RA-	223	-0.46	0.375	0.222	NA	FALSE
T Cell	CD8	CD8/27+31-95+127-	223	0.185	0.152	0.224	NA	FALSE
T Cell	CD8	CD8/27-28+31-95+127-	223	0.351	0.15	0.02	NA	FALSE
T Cell	DNT	DNT/27-28-31-57-127+RA+	196	-0.442	0.197	0.026	NA	FALSE
T Cell	DNT	DNT/28-31-57-127+RA+	197	-0.283	0.16	0.08	NA	FALSE
T Cell	DNT	DNT/27+28-31-57-127+RA+	196	-0.168	0.185	0.365	NA	FALSE
T Cell	DNT	DNT/27-31-57-127+RA+	196	-0.248	0.161	0.124	NA	FALSE
T Cell	DNT	DNT/31-57-127+RA+	196	-0.087	0.121	0.474	NA	FALSE
T Cell	DNT	DNT/27+31-57-127+RA+	196	-0.027	0.146	0.852	NA	FALSE
T Cell	DNT	DNT/27-28+31-57-127+RA+	197	-0.137	0.182	0.452	NA	FALSE
T Cell	CD8	CD8/28+31-95+127-	222	0.346	0.129	7.86e-03	NA	FALSE
T Cell	DNT	DNT/28+31-57-127+RA+	197	0.001	0.147	0.995	NA	FALSE
T Cell	DNT	DNT/27+28+31-57-127+RA+	197	0.026	0.161	0.873	NA	FALSE
T Cell	DNT	DNT/27-28-57-127+RA+	197	-0.445	0.168	8.89e-03	NA	FALSE
T Cell	DNT	DNT/28-57-127+RA+	197	-0.176	0.144	0.223	NA	FALSE
T Cell	DNT	DNT/27+28-57-127+RA+	197	-0.076	0.174	0.662	NA	FALSE
T Cell	DNT	DNT/27-57-127+RA+	197	-0.321	0.145	0.028	NA	FALSE
T Cell	DNT	DNT/57-127+RA+	196	-0.139	0.12	0.246	NA	FALSE
T Cell	DNT	DNT/27+57-127+RA+	196	-0.122	0.142	0.392	NA	FALSE
T Cell	DNT	DNT/27-28+57-127+RA+	197	-0.166	0.168	0.326	NA	FALSE
T Cell	CD8	CD8/27+28+31-95+127-	222	0.331	0.138	0.017	NA	FALSE
T Cell	DNT	DNT/28+57-127+RA+	196	-0.094	0.14	0.503	NA	FALSE
T Cell	DNT	DNT/27+28+57-127+RA+	197	-0.096	0.156	0.536	NA	FALSE
T Cell	DNT	DNT/27-28-31+57-127+RA+	196	-0.368	0.169	0.03	NA	FALSE
T Cell	DNT	DNT/28-31+57-127+RA+	197	-0.086	0.169	0.609	NA	FALSE
T Cell	DNT	DNT/27+28-31+57-127+RA+	197	-0.02	0.201	0.922	NA	FALSE
T Cell	DNT	DNT/27-31+57-127+RA+	197	-0.285	0.15	0.059	NA	FALSE
T Cell	DNT	DNT/31+57-127+RA+	197	-0.171	0.154	0.266	NA	FALSE
T Cell	DNT	DNT/27+31+57-127+RA+	196	-0.187	0.17	0.274	NA	FALSE
T Cell	DNT	DNT/27-28+31+57-127+RA+	195	-0.225	0.18	0.212	NA	FALSE
T Cell	CD8	CD8/27-28-95+127-	221	-0.188	0.209	0.369	NA	FALSE
T Cell	DNT	DNT/28+31+57-127+RA+	197	-0.164	0.168	0.333	NA	FALSE
T Cell	DNT	DNT/27+28+31+57-127+RA+	197	-0.178	0.181	0.325	NA	FALSE
T Cell	DNT	DNT/27-28-31-127+RA+	196	-0.438	0.205	0.034	NA	FALSE
T Cell	DNT	DNT/28-31-127+RA+	197	-0.285	0.162	0.08	NA	FALSE
T Cell	DNT	DNT/27+28-31-127+RA+	196	-0.177	0.185	0.341	NA	FALSE
T Cell	DNT	DNT/27-31-127+RA+	196	-0.254	0.163	0.122	NA	FALSE
T Cell	DNT	DNT/31-127+RA+	196	-0.089	0.119	0.455	NA	FALSE
T Cell	DNT	DNT/27+31-127+RA+	196	-0.026	0.145	0.856	NA	FALSE
T Cell	DNT	DNT/27-28+31-127+RA+	197	-0.138	0.182	0.449	NA	FALSE
T Cell	CD8	CD8/28-95+127-	222	-0.209	0.177	0.239	NA	FALSE
T Cell	DNT	DNT/28+31-127+RA+	197	0.003	0.147	0.984	NA	FALSE
T Cell	DNT	DNT/27+28+31-127+RA+	197	0.029	0.161	0.855	NA	FALSE
T Cell	DNT	DNT/27-28-127+RA+	197	-0.427	0.176	0.016	NA	FALSE
T Cell	DNT	DNT/28-127+RA+	197	-0.165	0.143	0.252	NA	FALSE
T Cell	DNT	DNT/27+28-127+RA+	197	-0.072	0.172	0.677	NA	FALSE
T Cell	DNT	DNT/27-127+RA+	197	-0.306	0.147	0.039	NA	FALSE
T Cell	DNT	DNT/127+RA+	195	-0.135	0.115	0.241	NA	FALSE
T Cell	DNT	DNT/27+127+RA+	196	-0.118	0.141	0.404	NA	FALSE
T Cell	DNT	DNT/27-28+127+RA+	197	-0.165	0.168	0.328	NA	FALSE
T Cell	CD8	CD8/27+28-95+127-	222	-0.326	0.181	0.074	NA	FALSE
T Cell	DNT	DNT/28+127+RA+	196	-0.09	0.139	0.518	NA	FALSE
T Cell	DNT	DNT/27+28+127+RA+	197	-0.092	0.155	0.553	NA	FALSE
T Cell	DNT	DNT/27-28-31+127+RA+	196	-0.346	0.178	0.053	NA	FALSE
T Cell	DNT	DNT/28-31+127+RA+	197	-0.062	0.167	0.713	NA	FALSE
T Cell	DNT	DNT/27+28-31+127+RA+	197	0	0.199	0.998	NA	FALSE
T Cell	DNT	DNT/27-31+127+RA+	196	-0.262	0.149	0.08	NA	FALSE
T Cell	DNT	DNT/31+127+RA+	197	-0.153	0.152	0.314	NA	FALSE
T Cell	DNT	DNT/27+31+127+RA+	196	-0.18	0.169	0.29	NA	FALSE
T Cell	DNT	DNT/27-28+31+127+RA+	195	-0.219	0.179	0.224	NA	FALSE
T Cell	CD8	CD8/27-95+127-	223	-0.2	0.177	0.261	NA	FALSE
T Cell	DNT	DNT/28+31+127+RA+	197	-0.158	0.168	0.347	NA	FALSE
T Cell	DNT	DNT/27+28+31+127+RA+	197	-0.173	0.18	0.337	NA	FALSE
T Cell	CD4	CD4/27-57+95+127-RA-	221	-0.547	0.438	0.213	NA	FALSE
T Cell	DNT	DNT/57+127+RA+	189	-0.279	0.253	0.27	NA	FALSE
T Cell	CD8	CD8/95+127-	223	-0.131	0.122	0.286	NA	FALSE
T Cell	CD4	CD4/57+95+127-RA-	223	-0.369	0.359	0.306	NA	FALSE
T Cell	CD8	CD8/27+95+127-	222	0.003	0.121	0.979	NA	FALSE
T Cell	DNT	DNT/27-28-31-57-95+127+RA+	194	-0.505	0.22	0.023	NA	FALSE
T Cell	DNT	DNT/28-31-57-95+127+RA+	197	-0.517	0.177	3.86e-03	NA	FALSE
T Cell	DNT	DNT/27+28-31-57-95+127+RA+	195	-0.388	0.205	0.06	NA	FALSE
T Cell	DNT	DNT/27-31-57-95+127+RA+	196	-0.264	0.184	0.152	NA	FALSE
T Cell	DNT	DNT/31-57-95+127+RA+	196	-0.241	0.142	0.091	NA	FALSE
T Cell	DNT	DNT/27+31-57-95+127+RA+	195	-0.196	0.152	0.2	NA	FALSE
T Cell	CD8	CD8/27-28+95+127-	223	0.223	0.133	0.095	NA	FALSE
T Cell	DNT	DNT/27-28+31-57-95+127+RA+	196	-0.139	0.209	0.508	NA	FALSE
T Cell	DNT	DNT/28+31-57-95+127+RA+	196	-0.121	0.159	0.447	NA	FALSE
T Cell	DNT	DNT/27+28+31-57-95+127+RA+	195	-0.138	0.16	0.388	NA	FALSE
T Cell	DNT	DNT/27-28-57-95+127+RA+	196	-0.538	0.205	9.32e-03	NA	FALSE
T Cell	DNT	DNT/28-57-95+127+RA+	197	-0.38	0.163	0.021	NA	FALSE
T Cell	DNT	DNT/27+28-57-95+127+RA+	196	-0.252	0.182	0.169	NA	FALSE
T Cell	DNT	DNT/27-57-95+127+RA+	197	-0.321	0.175	0.068	NA	FALSE
T Cell	DNT	DNT/57-95+127+RA+	196	-0.187	0.13	0.15	NA	FALSE
T Cell	DNT	DNT/27+57-95+127+RA+	195	-0.148	0.141	0.295	NA	FALSE
T Cell	DNT	DNT/27-28+57-95+127+RA+	197	-0.151	0.196	0.442	NA	FALSE
T Cell	CD8	CD8/28+95+127-	221	0.206	0.1	0.041	NA	FALSE
T Cell	DNT	DNT/28+57-95+127+RA+	196	-0.112	0.146	0.445	NA	FALSE
T Cell	DNT	DNT/27+28+57-95+127+RA+	196	-0.125	0.154	0.416	NA	FALSE
T Cell	DNT	DNT/27-28-31+57-95+127+RA+	193	-0.438	0.227	0.056	NA	FALSE
T Cell	DNT	DNT/28-31+57-95+127+RA+	196	-0.217	0.194	0.265	NA	FALSE
T Cell	DNT	DNT/27+28-31+57-95+127+RA+	195	-0.13	0.199	0.514	NA	FALSE
T Cell	DNT	DNT/27-31+57-95+127+RA+	196	-0.243	0.189	0.2	NA	FALSE
T Cell	DNT	DNT/31+57-95+127+RA+	196	-0.132	0.145	0.366	NA	FALSE
T Cell	DNT	DNT/27+31+57-95+127+RA+	195	-0.127	0.155	0.412	NA	FALSE
T Cell	DNT	DNT/27-28+31+57-95+127+RA+	195	-0.209	0.207	0.313	NA	FALSE
T Cell	CD8	CD8/27+28+95+127-	222	0.169	0.115	0.142	NA	FALSE
T Cell	DNT	DNT/28+31+57-95+127+RA+	196	-0.102	0.16	0.524	NA	FALSE
T Cell	DNT	DNT/27+28+31+57-95+127+RA+	196	-0.108	0.17	0.524	NA	FALSE
T Cell	DNT	DNT/27-28-31-95+127+RA+	195	-0.584	0.228	0.011	NA	FALSE
T Cell	DNT	DNT/28-31-95+127+RA+	197	-0.497	0.18	6.4e-03	NA	FALSE
T Cell	DNT	DNT/27+28-31-95+127+RA+	195	-0.384	0.208	0.066	NA	FALSE
T Cell	DNT	DNT/27-31-95+127+RA+	196	-0.262	0.185	0.159	NA	FALSE
T Cell	DNT	DNT/31-95+127+RA+	197	-0.229	0.142	0.108	NA	FALSE
T Cell	DNT	DNT/27+31-95+127+RA+	195	-0.192	0.152	0.21	NA	FALSE
T Cell	DNT	DNT/27-28+31-95+127+RA+	196	-0.139	0.209	0.508	NA	FALSE
T Cell	CD8	CD8/27-28-31+95+127-	222	-0.542	0.212	0.011	NA	FALSE
T Cell	DNT	DNT/28+31-95+127+RA+	196	-0.118	0.158	0.456	NA	FALSE
T Cell	DNT	DNT/27+28+31-95+127+RA+	195	-0.132	0.16	0.411	NA	FALSE
T Cell	DNT	DNT/27-28-95+127+RA+	196	-0.482	0.213	0.025	NA	FALSE
T Cell	DNT	DNT/28-95+127+RA+	197	-0.328	0.164	0.048	NA	FALSE
T Cell	DNT	DNT/27+28-95+127+RA+	196	-0.228	0.183	0.214	NA	FALSE
T Cell	DNT	DNT/27-95+127+RA+	197	-0.299	0.177	0.093	NA	FALSE
T Cell	DNT	DNT/95+127+RA+	196	-0.162	0.125	0.199	NA	FALSE
T Cell	DNT	DNT/27+95+127+RA+	195	-0.138	0.141	0.331	NA	FALSE
T Cell	DNT	DNT/27-28+95+127+RA+	197	-0.149	0.196	0.448	NA	FALSE
T Cell	CD8	CD8/28-31+95+127-	222	-0.532	0.174	2.5e-03	NA	FALSE
T Cell	DNT	DNT/28+95+127+RA+	196	-0.106	0.146	0.471	NA	FALSE
T Cell	DNT	DNT/27+28+95+127+RA+	196	-0.116	0.153	0.45	NA	FALSE
T Cell	DNT	DNT/27-28-31+95+127+RA+	194	-0.356	0.238	0.136	NA	FALSE
T Cell	DNT	DNT/28-31+95+127+RA+	196	-0.125	0.195	0.522	NA	FALSE
T Cell	DNT	DNT/27+28-31+95+127+RA+	195	-0.088	0.2	0.661	NA	FALSE
T Cell	DNT	DNT/27-31+95+127+RA+	196	-0.2	0.191	0.297	NA	FALSE
T Cell	DNT	DNT/31+95+127+RA+	197	-0.079	0.146	0.588	NA	FALSE
T Cell	DNT	DNT/27+31+95+127+RA+	196	-0.105	0.158	0.505	NA	FALSE
T Cell	DNT	DNT/27-28+31+95+127+RA+	195	-0.199	0.207	0.337	NA	FALSE
T Cell	CD8	CD8/27+28-31+95+127-	219	-0.439	0.171	0.011	NA	FALSE
T Cell	DNT	DNT/28+31+95+127+RA+	195	-0.104	0.156	0.509	NA	FALSE
T Cell	DNT	DNT/27+28+31+95+127+RA+	196	-0.098	0.169	0.563	NA	FALSE
T Cell	CD8	CD8/27-31+95+127-	222	-0.405	0.179	0.025	NA	FALSE
T Cell	CD8	CD8/31+95+127-	221	-0.295	0.122	0.016	NA	FALSE
T Cell	CD4	CD4/27-57-95-127-244-RA-	217	0.042	0.128	0.743	NA	FALSE
T Cell	DNT	DNT/28-31-57-95-127-244+RA+	197	-0.161	0.238	0.5	NA	FALSE
T Cell	DNT	DNT/27-31-57-95-127-244+RA+	197	-0.017	0.249	0.947	NA	FALSE
T Cell	DNT	DNT/31-57-95-127-244+RA+	197	-0.121	0.235	0.607	NA	FALSE
T Cell	DNT	DNT/27-28-57-95-127-244+RA+	197	-0.008	0.194	0.966	NA	FALSE
T Cell	DNT	DNT/28-57-95-127-244+RA+	197	-0.053	0.18	0.771	NA	FALSE
T Cell	CD8	CD8/27+31+95+127-	221	-0.138	0.126	0.276	NA	FALSE
T Cell	DNT	DNT/27+28-57-95-127-244+RA+	195	-0.474	0.222	0.034	NA	FALSE
T Cell	DNT	DNT/27-57-95-127-244+RA+	197	-0.005	0.191	0.978	NA	FALSE
T Cell	DNT	DNT/57-95-127-244+RA+	197	-0.06	0.176	0.732	NA	FALSE
T Cell	DNT	DNT/27+57-95-127-244+RA+	197	-0.466	0.217	0.033	NA	FALSE
T Cell	DNT	DNT/28-31+57-95-127-244+RA+	197	-0.066	0.157	0.674	NA	FALSE
T Cell	DNT	DNT/27-31+57-95-127-244+RA+	197	-0.042	0.168	0.804	NA	FALSE
T Cell	CD8	CD8/27-28+31+95+127-	223	0.071	0.146	0.63	NA	FALSE
T Cell	DNT	DNT/31+57-95-127-244+RA+	197	-0.08	0.154	0.603	NA	FALSE
T Cell	DNT	DNT/27+31+57-95-127-244+RA+	193	-0.395	0.198	0.048	NA	FALSE
T Cell	DNT	DNT/27-28-31-95-127-244+RA+	197	-0.139	0.267	0.605	NA	FALSE
T Cell	DNT	DNT/28-31-95-127-244+RA+	197	-0.187	0.251	0.457	NA	FALSE
T Cell	DNT	DNT/27-31-95-127-244+RA+	197	-0.105	0.263	0.691	NA	FALSE
T Cell	DNT	DNT/31-95-127-244+RA+	197	-0.147	0.246	0.551	NA	FALSE
T Cell	CD8	CD8/28+31+95+127-	223	0.056	0.118	0.635	NA	FALSE
T Cell	DNT	DNT/27-28-95-127-244+RA+	197	-0.043	0.211	0.838	NA	FALSE
T Cell	DNT	DNT/28-95-127-244+RA+	197	-0.067	0.196	0.733	NA	FALSE
T Cell	DNT	DNT/27+28-95-127-244+RA+	195	-0.494	0.234	0.036	NA	FALSE
T Cell	DNT	DNT/27-95-127-244+RA+	197	-0.04	0.207	0.848	NA	FALSE
T Cell	DNT	DNT/95-127-244+RA+	197	-0.072	0.192	0.708	NA	FALSE
T Cell	DNT	DNT/27+95-127-244+RA+	197	-0.482	0.228	0.036	NA	FALSE
T Cell	CD8	CD8/27+28+31+95+127-	221	0.025	0.126	0.844	NA	FALSE
T Cell	DNT	DNT/27-28-31+95-127-244+RA+	197	-0.062	0.179	0.731	NA	FALSE
T Cell	DNT	DNT/28-31+95-127-244+RA+	197	-0.075	0.168	0.656	NA	FALSE
T Cell	DNT	DNT/27-31+95-127-244+RA+	197	-0.056	0.176	0.748	NA	FALSE
T Cell	DNT	DNT/31+95-127-244+RA+	197	-0.086	0.164	0.599	NA	FALSE
T Cell	DNT	DNT/27+31+95-127-244+RA+	194	-0.452	0.211	0.033	NA	FALSE
T Cell	CD8	CD8/27-28-31-57+95+127-	223	-0.187	0.247	0.451	NA	FALSE
T Cell	DNT	DNT/28-31-57+95-127-244+RA+	189	-0.042	0.337	0.9	NA	FALSE
T Cell	DNT	DNT/31-57+95-127-244+RA+	189	-0.046	0.338	0.893	NA	FALSE
T Cell	DNT	DNT/27-28-57+95-127-244+RA+	194	0.017	0.339	0.96	NA	FALSE
T Cell	CD8	CD8/28-31-57+95+127-	222	-0.062	0.225	0.784	NA	FALSE
T Cell	DNT	DNT/28-57+95-127-244+RA+	196	-0.126	0.322	0.696	NA	FALSE
T Cell	DNT	DNT/27-57+95-127-244+RA+	194	0.011	0.337	0.974	NA	FALSE
T Cell	DNT	DNT/57+95-127-244+RA+	196	-0.136	0.32	0.671	NA	FALSE
T Cell	CD8	CD8/27+28-31-57+95+127-	216	-0.402	0.265	0.13	NA	FALSE
T Cell	DNT	DNT/27-28-31-57-127-244+RA+	197	-0.123	0.269	0.648	NA	FALSE
T Cell	DNT	DNT/28-31-57-127-244+RA+	197	-0.226	0.237	0.342	NA	FALSE
T Cell	DNT	DNT/27+28-31-57-127-244+RA+	195	-0.666	0.224	3.37e-03	NA	FALSE
T Cell	DNT	DNT/27-31-57-127-244+RA+	197	-0.103	0.263	0.697	NA	FALSE
T Cell	DNT	DNT/31-57-127-244+RA+	197	-0.208	0.227	0.36	NA	FALSE
T Cell	CD8	CD8/27-31-57+95+127-	222	-0.064	0.244	0.794	NA	FALSE
T Cell	DNT	DNT/27+31-57-127-244+RA+	195	-0.639	0.214	3.27e-03	NA	FALSE
T Cell	DNT	DNT/28+31-57-127-244+RA+	194	-0.322	0.234	0.171	NA	FALSE
T Cell	DNT	DNT/27-28-57-127-244+RA+	197	-0.164	0.231	0.477	NA	FALSE
T Cell	DNT	DNT/28-57-127-244+RA+	197	-0.221	0.197	0.262	NA	FALSE
T Cell	DNT	DNT/27+28-57-127-244+RA+	196	-0.485	0.182	8.29e-03	NA	FALSE
T Cell	DNT	DNT/27-57-127-244+RA+	197	-0.168	0.223	0.454	NA	FALSE
T Cell	DNT	DNT/57-127-244+RA+	197	-0.242	0.177	0.174	NA	FALSE
T Cell	CD8	CD8/31-57+95+127-	223	-0.188	0.219	0.392	NA	FALSE
T Cell	DNT	DNT/27+57-127-244+RA+	196	-0.532	0.149	4.75e-04	NA	FALSE
T Cell	DNT	DNT/27-28+57-127-244+RA+	194	-0.352	0.205	0.087	NA	FALSE
T Cell	DNT	DNT/28+57-127-244+RA+	196	-0.487	0.142	7.36e-04	NA	FALSE
T Cell	DNT	DNT/27+28+57-127-244+RA+	196	-0.601	0.147	6.75e-05	NA	FALSE
T Cell	DNT	DNT/27-28-31+57-127-244+RA+	197	-0.266	0.214	0.216	NA	FALSE
T Cell	DNT	DNT/28-31+57-127-244+RA+	197	-0.303	0.184	0.101	NA	FALSE
T Cell	CD4	CD4/27-31-57-95-RA-	218	0.139	0.138	0.316	NA	FALSE
T Cell	DNT	DNT/27+28-31+57-127-244+RA+	196	-0.441	0.189	0.021	NA	FALSE
T Cell	DNT	DNT/27-31+57-127-244+RA+	197	-0.283	0.207	0.174	NA	FALSE
T Cell	DNT	DNT/31+57-127-244+RA+	197	-0.336	0.162	0.04	NA	FALSE
T Cell	CD8	CD8/27+31-57+95+127-	216	-0.357	0.252	0.158	NA	FALSE
T Cell	DNT	DNT/27+31+57-127-244+RA+	196	-0.502	0.146	7.04e-04	NA	FALSE
T Cell	DNT	DNT/27-28+31+57-127-244+RA+	191	-0.423	0.208	0.044	NA	FALSE
T Cell	DNT	DNT/28+31+57-127-244+RA+	196	-0.465	0.151	2.35e-03	NA	FALSE
T Cell	DNT	DNT/27+28+31+57-127-244+RA+	197	-0.562	0.162	6.42e-04	NA	FALSE
T Cell	DNT	DNT/27-28-31-127-244+RA+	197	-0.163	0.285	0.567	NA	FALSE
T Cell	DNT	DNT/28-31-127-244+RA+	197	-0.237	0.251	0.346	NA	FALSE
T Cell	DNT	DNT/27+28-31-127-244+RA+	195	-0.622	0.228	7.06e-03	NA	FALSE
T Cell	CD4	CD4/31-57-95-RA-	220	0.277	0.127	0.031	NA	FALSE
T Cell	DNT	DNT/27-31-127-244+RA+	197	-0.15	0.279	0.591	NA	FALSE
T Cell	DNT	DNT/31-127-244+RA+	197	-0.227	0.241	0.347	NA	FALSE
T Cell	CD4	CD4/57-95-127-244-RA-	220	0.1	0.113	0.377	NA	FALSE
T Cell	DNT	DNT/27+31-127-244+RA+	195	-0.617	0.219	5.45e-03	NA	FALSE
T Cell	DNT	DNT/28+31-127-244+RA+	194	-0.344	0.229	0.135	NA	FALSE
T Cell	DNT	DNT/27-28-127-244+RA+	197	-0.161	0.25	0.52	NA	FALSE
T Cell	DNT	DNT/28-127-244+RA+	197	-0.2	0.213	0.35	NA	FALSE
T Cell	DNT	DNT/27+28-127-244+RA+	196	-0.472	0.188	0.013	NA	FALSE
T Cell	DNT	DNT/27-127-244+RA+	197	-0.166	0.243	0.494	NA	FALSE
T Cell	CD4	CD4/27+31-57-95-RA-	220	0.303	0.131	0.021	NA	FALSE
T Cell	DNT	DNT/127-244+RA+	197	-0.219	0.193	0.257	NA	FALSE
T Cell	DNT	DNT/27+127-244+RA+	196	-0.51	0.153	1.05e-03	NA	FALSE
T Cell	DNT	DNT/27-28+127-244+RA+	195	-0.492	0.204	0.017	NA	FALSE
T Cell	DNT	DNT/28+127-244+RA+	196	-0.465	0.139	1.01e-03	NA	FALSE
T Cell	DNT	DNT/27+28+127-244+RA+	197	-0.539	0.149	3.85e-04	NA	FALSE
T Cell	DNT	DNT/27-28-31+127-244+RA+	197	-0.225	0.23	0.329	NA	FALSE
T Cell	DNT	DNT/28-31+127-244+RA+	197	-0.25	0.197	0.205	NA	FALSE
T Cell	DNT	DNT/27+28-31+127-244+RA+	196	-0.42	0.194	0.032	NA	FALSE
T Cell	DNT	DNT/27-31+127-244+RA+	197	-0.243	0.223	0.278	NA	FALSE
T Cell	DNT	DNT/31+127-244+RA+	197	-0.277	0.173	0.11	NA	FALSE
T Cell	CD4	CD4/27-28+31-57-95-RA-	217	0.123	0.135	0.361	NA	FALSE
T Cell	DNT	DNT/27+31+127-244+RA+	196	-0.478	0.147	1.4e-03	NA	FALSE
T Cell	DNT	DNT/27-28+31+127-244+RA+	191	-0.484	0.209	0.021	NA	FALSE
T Cell	DNT	DNT/28+31+127-244+RA+	196	-0.434	0.148	3.88e-03	NA	FALSE
T Cell	DNT	DNT/27+28+31+127-244+RA+	197	-0.5	0.159	2e-03	NA	FALSE
T Cell	DNT	DNT/27-28-31-57+127-244+RA+	196	-0.138	0.353	0.697	NA	FALSE
T Cell	DNT	DNT/28-31-57+127-244+RA+	197	-0.34	0.32	0.29	NA	FALSE
T Cell	DNT	DNT/27-31-57+127-244+RA+	196	-0.145	0.351	0.68	NA	FALSE
T Cell	DNT	DNT/31-57+127-244+RA+	197	-0.356	0.314	0.259	NA	FALSE
T Cell	CD4	CD4/28+31-57-95-RA-	220	0.271	0.126	0.032	NA	FALSE
T Cell	DNT	DNT/27-28-57+127-244+RA+	197	-0.268	0.328	0.416	NA	FALSE
T Cell	DNT	DNT/28-57+127-244+RA+	197	-0.278	0.291	0.341	NA	FALSE
T Cell	DNT	DNT/27+28-57+127-244+RA+	192	-0.426	0.27	0.116	NA	FALSE
T Cell	DNT	DNT/27-57+127-244+RA+	197	-0.283	0.324	0.384	NA	FALSE
T Cell	DNT	DNT/57+127-244+RA+	197	-0.263	0.268	0.328	NA	FALSE
T Cell	CD8	CD8/27-28-57+95+127-	221	-0.279	0.226	0.219	NA	FALSE
T Cell	DNT	DNT/27+57+127-244+RA+	196	-0.318	0.233	0.174	NA	FALSE
T Cell	CD4	CD4/27+28+31-57-95-RA-	220	0.294	0.129	0.024	NA	FALSE
T Cell	DNT	DNT/28+57+127-244+RA+	190	-0.213	0.203	0.296	NA	FALSE
T Cell	DNT	DNT/27-28-31+57+127-244+RA+	194	-0.149	0.325	0.646	NA	FALSE
T Cell	DNT	DNT/28-31+57+127-244+RA+	196	-0.301	0.291	0.302	NA	FALSE
T Cell	DNT	DNT/27-31+57+127-244+RA+	195	-0.151	0.323	0.64	NA	FALSE
T Cell	DNT	DNT/31+57+127-244+RA+	197	-0.262	0.252	0.299	NA	FALSE
T Cell	CD8	CD8/28-57+95+127-	221	-0.286	0.2	0.153	NA	FALSE
T Cell	DNT	DNT/27+31+57+127-244+RA+	195	-0.312	0.224	0.165	NA	FALSE
T Cell	DNT	DNT/28+31+57+127-244+RA+	188	-0.201	0.204	0.326	NA	FALSE
T Cell	DNT	DNT/28-31-57-95+127-244+RA+	197	-0.254	0.26	0.331	NA	FALSE
T Cell	DNT	DNT/27-31-57-95+127-244+RA+	197	-0.137	0.295	0.642	NA	FALSE
T Cell	DNT	DNT/31-57-95+127-244+RA+	197	-0.238	0.244	0.33	NA	FALSE
T Cell	DNT	DNT/27+31-57-95+127-244+RA+	195	-0.595	0.219	7.24e-03	NA	FALSE
T Cell	DNT	DNT/28+31-57-95+127-244+RA+	191	-0.382	0.23	0.098	NA	FALSE
T Cell	CD8	CD8/27+28-57+95+127-	221	-0.4	0.242	0.1	NA	FALSE
T Cell	DNT	DNT/27-28-57-95+127-244+RA+	197	-0.205	0.282	0.468	NA	FALSE
T Cell	DNT	DNT/28-57-95+127-244+RA+	197	-0.272	0.231	0.241	NA	FALSE
T Cell	DNT	DNT/27+28-57-95+127-244+RA+	195	-0.521	0.19	6.71e-03	NA	FALSE
T Cell	DNT	DNT/27-57-95+127-244+RA+	197	-0.209	0.271	0.442	NA	FALSE
T Cell	DNT	DNT/57-95+127-244+RA+	197	-0.286	0.201	0.156	NA	FALSE
T Cell	DNT	DNT/27+57-95+127-244+RA+	196	-0.545	0.157	6.36e-04	NA	FALSE
T Cell	DNT	DNT/27-28+57-95+127-244+RA+	191	-0.365	0.215	0.092	NA	FALSE
T Cell	DNT	DNT/28+57-95+127-244+RA+	196	-0.473	0.15	1.89e-03	NA	FALSE
T Cell	DNT	DNT/27+28+57-95+127-244+RA+	195	-0.591	0.151	1.27e-04	NA	FALSE
T Cell	CD8	CD8/27-57+95+127-	222	-0.393	0.22	0.075	NA	FALSE
T Cell	DNT	DNT/28-31+57-95+127-244+RA+	197	-0.375	0.233	0.109	NA	FALSE
T Cell	DNT	DNT/27-31+57-95+127-244+RA+	197	-0.355	0.273	0.195	NA	FALSE
T Cell	DNT	DNT/31+57-95+127-244+RA+	197	-0.398	0.196	0.044	NA	FALSE
T Cell	DNT	DNT/27+31+57-95+127-244+RA+	197	-0.524	0.159	1.21e-03	NA	FALSE
T Cell	DNT	DNT/28+31+57-95+127-244+RA+	195	-0.468	0.159	3.64e-03	NA	FALSE
T Cell	DNT	DNT/27-28-31-95+127-244+RA+	197	-0.163	0.318	0.61	NA	FALSE
T Cell	DNT	DNT/28-31-95+127-244+RA+	197	-0.258	0.275	0.349	NA	FALSE
T Cell	DNT	DNT/27+28-31-95+127-244+RA+	194	-0.586	0.234	0.013	NA	FALSE
T Cell	DNT	DNT/27-31-95+127-244+RA+	197	-0.162	0.31	0.603	NA	FALSE
T Cell	CD8	CD8/57+95+127-	223	-0.354	0.189	0.063	NA	FALSE
T Cell	DNT	DNT/31-95+127-244+RA+	197	-0.255	0.26	0.328	NA	FALSE
T Cell	DNT	DNT/27+31-95+127-244+RA+	195	-0.601	0.227	8.82e-03	NA	FALSE
T Cell	DNT	DNT/28+31-95+127-244+RA+	191	-0.393	0.227	0.084	NA	FALSE
T Cell	DNT	DNT/27-28-95+127-244+RA+	197	-0.186	0.296	0.53	NA	FALSE
T Cell	CD4	CD4/27-57-95-RA-	218	0.159	0.136	0.244	NA	FALSE
T Cell	DNT	DNT/28-95+127-244+RA+	197	-0.239	0.244	0.33	NA	FALSE
T Cell	DNT	DNT/27+28-95+127-244+RA+	195	-0.488	0.195	0.013	NA	FALSE
T Cell	DNT	DNT/27-95+127-244+RA+	197	-0.193	0.286	0.501	NA	FALSE
T Cell	CD8	CD8/27+57+95+127-	223	-0.225	0.225	0.318	NA	FALSE
T Cell	DNT	DNT/95+127-244+RA+	197	-0.249	0.214	0.246	NA	FALSE
T Cell	DNT	DNT/27+95+127-244+RA+	196	-0.507	0.159	1.67e-03	NA	FALSE
T Cell	DNT	DNT/27-28+95+127-244+RA+	192	-0.483	0.212	0.024	NA	FALSE
T Cell	DNT	DNT/28+95+127-244+RA+	196	-0.445	0.146	2.65e-03	NA	FALSE
T Cell	DNT	DNT/27+28+95+127-244+RA+	196	-0.523	0.15	6.29e-04	NA	FALSE
T Cell	DNT	DNT/27-28-31+95+127-244+RA+	197	-0.274	0.295	0.354	NA	FALSE
T Cell	DNT	DNT/28-31+95+127-244+RA+	197	-0.299	0.242	0.217	NA	FALSE
T Cell	CD4	CD4/57-95-RA-	220	0.275	0.127	0.031	NA	FALSE
T Cell	DNT	DNT/27+28-31+95+127-244+RA+	195	-0.481	0.205	0.02	NA	FALSE
T Cell	DNT	DNT/27-31+95+127-244+RA+	197	-0.297	0.284	0.297	NA	FALSE
T Cell	CD8	CD8/27-28+57+95+127-	216	-0.368	0.183	0.046	NA	FALSE
T Cell	DNT	DNT/31+95+127-244+RA+	197	-0.319	0.202	0.117	NA	FALSE
T Cell	DNT	DNT/27+31+95+127-244+RA+	197	-0.48	0.158	2.76e-03	NA	FALSE
T Cell	DNT	DNT/27-28+31+95+127-244+RA+	186	-0.449	0.238	0.061	NA	FALSE
T Cell	DNT	DNT/28+31+95+127-244+RA+	196	-0.426	0.155	6.68e-03	NA	FALSE
T Cell	DNT	DNT/27+28+31+95+127-244+RA+	196	-0.482	0.16	2.91e-03	NA	FALSE
T Cell	DNT	DNT/28-31-57+95+127-244+RA+	194	-0.176	0.339	0.603	NA	FALSE
T Cell	DNT	DNT/27-31-57+95+127-244+RA+	194	-0.097	0.374	0.796	NA	FALSE
T Cell	DNT	DNT/31-57+95+127-244+RA+	194	-0.198	0.331	0.55	NA	FALSE
T Cell	CD4	CD4/27+57-95-RA-	220	0.302	0.131	0.022	NA	FALSE
T Cell	CD4	CD4/27+57-95-127-244-RA-	220	0.12	0.115	0.296	NA	FALSE
T Cell	DNT	DNT/27-28-57+95+127-244+RA+	197	-0.233	0.362	0.522	NA	FALSE
T Cell	DNT	DNT/28-57+95+127-244+RA+	197	-0.259	0.317	0.415	NA	FALSE
T Cell	DNT	DNT/27-57+95+127-244+RA+	197	-0.253	0.357	0.479	NA	FALSE
T Cell	DNT	DNT/57+95+127-244+RA+	197	-0.238	0.281	0.399	NA	FALSE
T Cell	DNT	DNT/27+57+95+127-244+RA+	194	-0.276	0.226	0.223	NA	FALSE
T Cell	DNT	DNT/28+57+95+127-244+RA+	190	-0.189	0.204	0.354	NA	FALSE
T Cell	CD4	CD4/27-28+57-95-RA-	217	0.123	0.134	0.359	NA	FALSE
T Cell	CD8	CD8/28+57+95+127-	220	-0.134	0.157	0.396	NA	FALSE
T Cell	DNT	DNT/28-31+57+95+127-244+RA+	194	-0.307	0.307	0.319	NA	FALSE
T Cell	DNT	DNT/27-31+57+95+127-244+RA+	193	-0.201	0.356	0.574	NA	FALSE
T Cell	DNT	DNT/31+57+95+127-244+RA+	197	-0.232	0.265	0.381	NA	FALSE
T Cell	DNT	DNT/27+31+57+95+127-244+RA+	194	-0.254	0.22	0.25	NA	FALSE
T Cell	DNT	DNT/27-28-31-57-95-244+RA+	197	-0.235	0.236	0.321	NA	FALSE
T Cell	DNT	DNT/28-31-57-95-244+RA+	196	-0.245	0.222	0.271	NA	FALSE
T Cell	DNT	DNT/27+28-31-57-95-244+RA+	191	-0.727	0.267	7.1e-03	NA	FALSE
T Cell	DNT	DNT/27-31-57-95-244+RA+	197	-0.222	0.228	0.332	NA	FALSE
T Cell	CD8	CD8/27+28+57+95+127-	218	-0.016	0.197	0.934	NA	FALSE
T Cell	CD4	CD4/28+57-95-RA-	220	0.269	0.126	0.033	NA	FALSE
T Cell	DNT	DNT/31-57-95-244+RA+	197	-0.347	0.204	0.091	NA	FALSE
T Cell	DNT	DNT/27+31-57-95-244+RA+	196	-0.625	0.244	0.011	NA	FALSE
T Cell	DNT	DNT/28+31-57-95-244+RA+	193	-0.44	0.234	0.062	NA	FALSE
T Cell	DNT	DNT/27-28-57-95-244+RA+	197	-0.178	0.185	0.339	NA	FALSE
T Cell	DNT	DNT/28-57-95-244+RA+	197	-0.284	0.175	0.106	NA	FALSE
T Cell	DNT	DNT/27+28-57-95-244+RA+	197	-0.573	0.241	0.019	NA	FALSE
T Cell	DNT	DNT/27-57-95-244+RA+	197	-0.197	0.18	0.276	NA	FALSE
T Cell	CD8	CD8/27-28-31+57+95+127-	221	-0.618	0.23	7.83e-03	NA	FALSE
T Cell	DNT	DNT/57-95-244+RA+	197	-0.306	0.16	0.057	NA	FALSE
T Cell	CD4	CD4/27+28+57-95-RA-	220	0.292	0.129	0.025	NA	FALSE
T Cell	DNT	DNT/27+57-95-244+RA+	196	-0.489	0.198	0.014	NA	FALSE
T Cell	DNT	DNT/27-28+57-95-244+RA+	189	-0.403	0.213	0.061	NA	FALSE
T Cell	DNT	DNT/28+57-95-244+RA+	196	-0.421	0.181	0.021	NA	FALSE
T Cell	DNT	DNT/27+28+57-95-244+RA+	196	-0.445	0.195	0.023	NA	FALSE
T Cell	DNT	DNT/27-28-31+57-95-244+RA+	197	-0.171	0.162	0.295	NA	FALSE
T Cell	DNT	DNT/28-31+57-95-244+RA+	197	-0.239	0.156	0.127	NA	FALSE
T Cell	DNT	DNT/27+28-31+57-95-244+RA+	196	-0.411	0.226	0.071	NA	FALSE
T Cell	CD8	CD8/28-31+57+95+127-	222	-0.598	0.206	4.17e-03	NA	FALSE
T Cell	DNT	DNT/27-31+57-95-244+RA+	197	-0.181	0.158	0.254	NA	FALSE
T Cell	DNT	DNT/31+57-95-244+RA+	197	-0.276	0.141	0.052	NA	FALSE
T Cell	DNT	DNT/27+31+57-95-244+RA+	196	-0.367	0.184	0.048	NA	FALSE
T Cell	DNT	DNT/28+31+57-95-244+RA+	195	-0.378	0.166	0.024	NA	FALSE
T Cell	DNT	DNT/27+28+31+57-95-244+RA+	195	-0.373	0.186	0.046	NA	FALSE
T Cell	DNT	DNT/27-28-31-95-244+RA+	196	-0.118	0.25	0.637	NA	FALSE
T Cell	DNT	DNT/28-31-95-244+RA+	197	-0.358	0.232	0.125	NA	FALSE
T Cell	DNT	DNT/27+28-31-95-244+RA+	193	-0.825	0.267	2.35e-03	NA	FALSE
T Cell	CD8	CD8/27+28-31+57+95+127-	220	-0.508	0.245	0.04	NA	FALSE
T Cell	DNT	DNT/27-31-95-244+RA+	197	-0.252	0.241	0.296	NA	FALSE
T Cell	DNT	DNT/31-95-244+RA+	197	-0.329	0.214	0.127	NA	FALSE
T Cell	DNT	DNT/27+31-95-244+RA+	196	-0.641	0.248	0.01	NA	FALSE
T Cell	DNT	DNT/28+31-95-244+RA+	193	-0.451	0.234	0.055	NA	FALSE
T Cell	DNT	DNT/27-28-95-244+RA+	197	-0.181	0.201	0.369	NA	FALSE
T Cell	DNT	DNT/28-95-244+RA+	197	-0.261	0.187	0.164	NA	FALSE
T Cell	DNT	DNT/27+28-95-244+RA+	197	-0.594	0.245	0.016	NA	FALSE
T Cell	CD8	CD8/27-31+57+95+127-	222	-0.577	0.226	0.011	NA	FALSE
T Cell	DNT	DNT/27-95-244+RA+	197	-0.198	0.195	0.311	NA	FALSE
T Cell	DNT	DNT/95-244+RA+	197	-0.28	0.171	0.103	NA	FALSE
T Cell	DNT	DNT/27+95-244+RA+	197	-0.528	0.207	0.012	NA	FALSE
T Cell	DNT	DNT/27-28+95-244+RA+	190	-0.424	0.209	0.044	NA	FALSE
T Cell	DNT	DNT/28+95-244+RA+	196	-0.43	0.181	0.018	NA	FALSE
T Cell	DNT	DNT/27+28+95-244+RA+	196	-0.448	0.194	0.022	NA	FALSE
T Cell	DNT	DNT/27-28-31+95-244+RA+	197	-0.17	0.172	0.324	NA	FALSE
T Cell	DNT	DNT/28-31+95-244+RA+	197	-0.227	0.165	0.171	NA	FALSE
T Cell	DNT	DNT/27+28-31+95-244+RA+	196	-0.447	0.232	0.055	NA	FALSE
T Cell	CD8	CD8/31+57+95+127-	222	-0.528	0.185	4.76e-03	NA	FALSE
T Cell	DNT	DNT/27-31+95-244+RA+	197	-0.178	0.167	0.29	NA	FALSE
T Cell	DNT	DNT/31+95-244+RA+	197	-0.256	0.149	0.087	NA	FALSE
T Cell	DNT	DNT/27+31+95-244+RA+	196	-0.395	0.187	0.036	NA	FALSE
T Cell	DNT	DNT/28+31+95-244+RA+	195	-0.388	0.166	0.02	NA	FALSE
T Cell	DNT	DNT/27+28+31+95-244+RA+	195	-0.374	0.186	0.045	NA	FALSE
T Cell	DNT	DNT/28-31-57+95-244+RA+	189	-0.113	0.325	0.728	NA	FALSE
T Cell	CD8	CD8/27+31+57+95+127-	221	-0.282	0.217	0.195	NA	FALSE
T Cell	DNT	DNT/27-31-57+95-244+RA+	187	0.029	0.34	0.932	NA	FALSE
T Cell	DNT	DNT/31-57+95-244+RA+	189	-0.117	0.324	0.719	NA	FALSE
T Cell	DNT	DNT/27-28-57+95-244+RA+	194	-0.069	0.331	0.834	NA	FALSE
T Cell	CD4	CD4/31+57-95-RA-	220	0.232	0.151	0.125	NA	FALSE
T Cell	DNT	DNT/28-57+95-244+RA+	196	-0.222	0.318	0.487	NA	FALSE
T Cell	DNT	DNT/27-57+95-244+RA+	194	-0.075	0.33	0.821	NA	FALSE
T Cell	DNT	DNT/57+95-244+RA+	196	-0.233	0.315	0.461	NA	FALSE
T Cell	CD4	CD4/27+31+57-95-RA-	220	0.274	0.161	0.089	NA	FALSE
T Cell	CD8	CD8/28+31+57+95+127-	222	-0.125	0.177	0.481	NA	FALSE
T Cell	DNT	DNT/31+57+95-244+RA+	189	-0.352	0.292	0.23	NA	FALSE
T Cell	DNT	DNT/27-28-31-57-244+RA+	197	-0.327	0.232	0.16	NA	FALSE
T Cell	DNT	DNT/28-31-57-244+RA+	197	-0.425	0.191	0.027	NA	FALSE
T Cell	DNT	DNT/27+28-31-57-244+RA+	196	-0.667	0.206	1.44e-03	NA	FALSE
T Cell	CD4	CD4/27-28+57-95-127-244-RA-	218	-0.001	0.131	0.996	NA	FALSE
T Cell	DNT	DNT/27-31-57-244+RA+	197	-0.343	0.197	0.082	NA	FALSE
T Cell	DNT	DNT/31-57-244+RA+	196	-0.309	0.147	0.037	NA	FALSE
T Cell	DNT	DNT/27+31-57-244+RA+	195	-0.542	0.168	1.5e-03	NA	FALSE
T Cell	DNT	DNT/27-28+31-57-244+RA+	196	-0.331	0.21	0.116	NA	FALSE
T Cell	DNT	DNT/28+31-57-244+RA+	196	-0.349	0.185	0.061	NA	FALSE
T Cell	DNT	DNT/27+28+31-57-244+RA+	195	-0.267	0.198	0.18	NA	FALSE
T Cell	DNT	DNT/27-28-57-244+RA+	197	-0.321	0.2	0.111	NA	FALSE
T Cell	DNT	DNT/28-57-244+RA+	197	-0.389	0.159	0.016	NA	FALSE
T Cell	DNT	DNT/27+28-57-244+RA+	196	-0.527	0.172	2.49e-03	NA	FALSE
T Cell	DNT	DNT/27-57-244+RA+	196	-0.33	0.166	0.048	NA	FALSE
T Cell	CD8	CD8/27+28+31+57+95+127-	218	-0.024	0.202	0.904	NA	FALSE
T Cell	CD4	CD4/28+31+57-95-RA-	220	0.234	0.153	0.126	NA	FALSE
T Cell	DNT	DNT/57-244+RA+	196	-0.335	0.111	2.97e-03	NA	FALSE
T Cell	DNT	DNT/27+57-244+RA+	194	-0.416	0.134	2.14e-03	NA	FALSE
T Cell	DNT	DNT/27-28+57-244+RA+	197	-0.336	0.187	0.074	NA	FALSE
T Cell	DNT	DNT/28+57-244+RA+	196	-0.31	0.153	0.044	NA	FALSE
T Cell	DNT	DNT/27+28+57-244+RA+	195	-0.318	0.161	0.05	NA	FALSE
T Cell	DNT	DNT/27-28-31+57-244+RA+	197	-0.351	0.193	0.071	NA	FALSE
T Cell	DNT	DNT/28-31+57-244+RA+	197	-0.405	0.156	0.01	NA	FALSE
T Cell	DNT	DNT/27+28-31+57-244+RA+	196	-0.454	0.167	7.16e-03	NA	FALSE
T Cell	DNT	DNT/27-31+57-244+RA+	197	-0.33	0.167	0.05	NA	FALSE
T Cell	CD8	CD8/27-28-31-57-95-	221	0.128	0.215	0.553	NA	FALSE
T Cell	DNT	DNT/31+57-244+RA+	197	-0.298	0.116	0.011	NA	FALSE
T Cell	CD4	CD4/27+28+31+57-95-RA-	220	0.26	0.16	0.106	NA	FALSE
T Cell	DNT	DNT/27+31+57-244+RA+	195	-0.312	0.136	0.023	NA	FALSE
T Cell	DNT	DNT/27-28+31+57-244+RA+	197	-0.321	0.191	0.094	NA	FALSE
T Cell	DNT	DNT/28+31+57-244+RA+	197	-0.23	0.154	0.137	NA	FALSE
T Cell	DNT	DNT/27+28+31+57-244+RA+	196	-0.23	0.162	0.157	NA	FALSE
T Cell	DNT	DNT/27-28-31-244+RA+	197	-0.319	0.25	0.204	NA	FALSE
T Cell	DNT	DNT/28-31-244+RA+	197	-0.402	0.207	0.054	NA	FALSE
T Cell	DNT	DNT/27+28-31-244+RA+	196	-0.663	0.212	2e-03	NA	FALSE
T Cell	DNT	DNT/27-31-244+RA+	197	-0.332	0.214	0.123	NA	FALSE
T Cell	CD8	CD8/28-31-57-95-	221	0.206	0.2	0.304	NA	FALSE
T Cell	DNT	DNT/31-244+RA+	196	-0.275	0.158	0.083	NA	FALSE
T Cell	DNT	DNT/27+31-244+RA+	195	-0.548	0.17	1.52e-03	NA	FALSE
T Cell	DNT	DNT/27-28+31-244+RA+	197	-0.308	0.211	0.145	NA	FALSE
T Cell	DNT	DNT/28+31-244+RA+	196	-0.347	0.184	0.061	NA	FALSE
T Cell	DNT	DNT/27+28+31-244+RA+	195	-0.261	0.198	0.188	NA	FALSE
T Cell	DNT	DNT/27-28-244+RA+	197	-0.288	0.221	0.195	NA	FALSE
T Cell	DNT	DNT/28-244+RA+	197	-0.339	0.176	0.055	NA	FALSE
T Cell	DNT	DNT/27+28-244+RA+	196	-0.517	0.175	3.64e-03	NA	FALSE
T Cell	CD8	CD8/27+28-31-57-95-	219	0.259	0.232	0.265	NA	FALSE
T Cell	DNT	DNT/27-244+RA+	197	-0.296	0.189	0.12	NA	FALSE
T Cell	DNT	DNT/244+RA+	196	-0.297	0.122	0.016	NA	FALSE
T Cell	DNT	DNT/27+244+RA+	194	-0.416	0.133	2.01e-03	NA	FALSE
T Cell	DNT	DNT/27-28+244+RA+	197	-0.337	0.185	0.07	NA	FALSE
T Cell	DNT	DNT/28+244+RA+	196	-0.302	0.151	0.047	NA	FALSE
T Cell	DNT	DNT/27+28+244+RA+	195	-0.31	0.159	0.053	NA	FALSE
T Cell	DNT	DNT/27-28-31+244+RA+	197	-0.302	0.21	0.152	NA	FALSE
T Cell	DNT	DNT/28-31+244+RA+	197	-0.342	0.169	0.044	NA	FALSE
T Cell	DNT	DNT/27+28-31+244+RA+	196	-0.435	0.171	0.012	NA	FALSE
T Cell	CD8	CD8/27-31-57-95-	223	0.263	0.215	0.222	NA	FALSE
T Cell	DNT	DNT/27-31+244+RA+	197	-0.286	0.183	0.119	NA	FALSE
T Cell	DNT	DNT/31+244+RA+	197	-0.253	0.121	0.037	NA	FALSE
T Cell	DNT	DNT/27+31+244+RA+	195	-0.314	0.134	0.02	NA	FALSE
T Cell	DNT	DNT/27-28+31+244+RA+	197	-0.324	0.189	0.089	NA	FALSE
T Cell	DNT	DNT/28+31+244+RA+	197	-0.224	0.152	0.141	NA	FALSE
T Cell	DNT	DNT/27+28+31+244+RA+	196	-0.226	0.159	0.158	NA	FALSE
T Cell	DNT	DNT/27-28-31-57+244+RA+	196	-0.188	0.34	0.582	NA	FALSE
T Cell	DNT	DNT/28-31-57+244+RA+	196	-0.252	0.306	0.412	NA	FALSE
T Cell	CD8	CD8/31-57-95-	223	0.467	0.237	0.051	NA	FALSE
T Cell	DNT	DNT/27-31-57+244+RA+	196	-0.187	0.335	0.578	NA	FALSE
T Cell	DNT	DNT/31-57+244+RA+	196	-0.231	0.297	0.437	NA	FALSE
T Cell	CD4	CD4/27-31-95-RA-	218	0.123	0.14	0.378	NA	FALSE
T Cell	DNT	DNT/27-28-57+244+RA+	197	-0.304	0.311	0.329	NA	FALSE
T Cell	DNT	DNT/28-57+244+RA+	197	-0.303	0.273	0.268	NA	FALSE
T Cell	DNT	DNT/27+28-57+244+RA+	193	-0.391	0.272	0.153	NA	FALSE
T Cell	CD8	CD8/27+31-57-95-	223	0.529	0.261	0.044	NA	FALSE
T Cell	DNT	DNT/27-57+244+RA+	197	-0.302	0.304	0.322	NA	FALSE
T Cell	DNT	DNT/57+244+RA+	197	-0.265	0.25	0.291	NA	FALSE
T Cell	DNT	DNT/27+57+244+RA+	196	-0.257	0.237	0.281	NA	FALSE
T Cell	DNT	DNT/28+57+244+RA+	191	-0.2	0.203	0.326	NA	FALSE
T Cell	DNT	DNT/27+28+57+244+RA+	190	-0.072	0.219	0.741	NA	FALSE
T Cell	DNT	DNT/27-28-31+57+244+RA+	196	-0.159	0.313	0.612	NA	FALSE
T Cell	CD4	CD4/31-95-RA-	220	0.274	0.127	0.032	NA	FALSE
T Cell	DNT	DNT/28-31+57+244+RA+	196	-0.311	0.27	0.251	NA	FALSE
T Cell	CD8	CD8/27-28+31-57-95-	219	0.428	0.249	0.086	NA	FALSE
T Cell	DNT	DNT/27-31+57+244+RA+	197	-0.293	0.301	0.331	NA	FALSE
T Cell	DNT	DNT/31+57+244+RA+	197	-0.251	0.236	0.29	NA	FALSE
T Cell	DNT	DNT/27+31+57+244+RA+	194	-0.263	0.221	0.237	NA	FALSE
T Cell	DNT	DNT/28+31+57+244+RA+	190	-0.231	0.203	0.256	NA	FALSE
T Cell	DNT	DNT/27+28+31+57+244+RA+	189	-0.125	0.218	0.565	NA	FALSE
T Cell	DNT	DNT/27-28-31-57-95+244+RA+	197	-0.349	0.261	0.182	NA	FALSE
T Cell	DNT	DNT/28-31-57-95+244+RA+	197	-0.393	0.205	0.056	NA	FALSE
T Cell	CD4	CD4/27+31-95-RA-	220	0.303	0.131	0.021	NA	FALSE
T Cell	DNT	DNT/27+28-31-57-95+244+RA+	195	-0.585	0.198	3.62e-03	NA	FALSE
T Cell	CD8	CD8/28+31-57-95-	222	0.538	0.263	0.042	NA	FALSE
T Cell	DNT	DNT/27-31-57-95+244+RA+	197	-0.335	0.207	0.107	NA	FALSE
T Cell	DNT	DNT/31-57-95+244+RA+	196	-0.282	0.152	0.065	NA	FALSE
T Cell	DNT	DNT/27+31-57-95+244+RA+	194	-0.489	0.168	4.11e-03	NA	FALSE
T Cell	DNT	DNT/27-28+31-57-95+244+RA+	197	-0.3	0.217	0.168	NA	FALSE
T Cell	DNT	DNT/28+31-57-95+244+RA+	195	-0.345	0.19	0.071	NA	FALSE
T Cell	DNT	DNT/27+28+31-57-95+244+RA+	195	-0.235	0.208	0.26	NA	FALSE
T Cell	DNT	DNT/27-28-57-95+244+RA+	197	-0.33	0.245	0.179	NA	FALSE
T Cell	DNT	DNT/28-57-95+244+RA+	197	-0.376	0.185	0.044	NA	FALSE
T Cell	DNT	DNT/27+28-57-95+244+RA+	195	-0.489	0.163	3.11e-03	NA	FALSE
T Cell	CD4	CD4/27-28+31-95-RA-	217	0.122	0.135	0.365	NA	FALSE
T Cell	CD8	CD8/27+28+31-57-95-	221	0.422	0.263	0.11	NA	FALSE
T Cell	DNT	DNT/27-57-95+244+RA+	197	-0.306	0.196	0.119	NA	FALSE
T Cell	DNT	DNT/57-95+244+RA+	196	-0.3	0.125	0.017	NA	FALSE
T Cell	DNT	DNT/27+57-95+244+RA+	194	-0.37	0.138	7.98e-03	NA	FALSE
T Cell	DNT	DNT/27-28+57-95+244+RA+	197	-0.32	0.195	0.102	NA	FALSE
T Cell	DNT	DNT/28+57-95+244+RA+	196	-0.29	0.162	0.075	NA	FALSE
T Cell	DNT	DNT/27+28+57-95+244+RA+	195	-0.3	0.171	0.08	NA	FALSE
T Cell	DNT	DNT/27-28-31+57-95+244+RA+	197	-0.375	0.256	0.144	NA	FALSE
T Cell	DNT	DNT/28-31+57-95+244+RA+	197	-0.432	0.198	0.031	NA	FALSE
T Cell	DNT	DNT/27+28-31+57-95+244+RA+	195	-0.389	0.18	0.031	NA	FALSE
T Cell	DNT	DNT/27-31+57-95+244+RA+	196	-0.344	0.205	0.096	NA	FALSE
T Cell	CD4	CD4/28+57-95-127-244-RA-	220	0.094	0.11	0.392	NA	FALSE
T Cell	CD4	CD4/28+31-95-RA-	220	0.27	0.126	0.033	NA	FALSE
T Cell	DNT	DNT/31+57-95+244+RA+	197	-0.262	0.142	0.067	NA	FALSE
T Cell	DNT	DNT/27+31+57-95+244+RA+	195	-0.277	0.147	0.062	NA	FALSE
T Cell	DNT	DNT/27-28+31+57-95+244+RA+	196	-0.328	0.201	0.104	NA	FALSE
T Cell	DNT	DNT/28+31+57-95+244+RA+	197	-0.207	0.167	0.217	NA	FALSE
T Cell	DNT	DNT/27+28+31+57-95+244+RA+	196	-0.201	0.176	0.255	NA	FALSE
T Cell	DNT	DNT/27-28-31-95+244+RA+	197	-0.311	0.279	0.267	NA	FALSE
T Cell	DNT	DNT/28-31-95+244+RA+	197	-0.371	0.224	0.1	NA	FALSE
T Cell	DNT	DNT/27+28-31-95+244+RA+	195	-0.589	0.207	4.99e-03	NA	FALSE
T Cell	DNT	DNT/27-31-95+244+RA+	197	-0.315	0.226	0.166	NA	FALSE
T Cell	CD8	CD8/27-28-57-95-	222	-0.008	0.194	0.968	NA	FALSE
T Cell	DNT	DNT/31-95+244+RA+	196	-0.246	0.162	0.131	NA	FALSE
T Cell	CD4	CD4/27+28+31-95-RA-	220	0.293	0.129	0.024	NA	FALSE
T Cell	DNT	DNT/27+31-95+244+RA+	194	-0.491	0.17	4.25e-03	NA	FALSE
T Cell	DNT	DNT/27-28+31-95+244+RA+	197	-0.298	0.215	0.166	NA	FALSE
T Cell	DNT	DNT/28+31-95+244+RA+	195	-0.341	0.189	0.072	NA	FALSE
T Cell	DNT	DNT/27+28+31-95+244+RA+	195	-0.23	0.208	0.269	NA	FALSE
T Cell	DNT	DNT/27-28-95+244+RA+	197	-0.28	0.263	0.289	NA	FALSE
T Cell	DNT	DNT/28-95+244+RA+	197	-0.32	0.202	0.115	NA	FALSE
T Cell	DNT	DNT/27+28-95+244+RA+	195	-0.471	0.167	5.49e-03	NA	FALSE
T Cell	DNT	DNT/27-95+244+RA+	197	-0.268	0.214	0.211	NA	FALSE
T Cell	CD8	CD8/28-57-95-	221	0.146	0.159	0.36	NA	FALSE
T Cell	DNT	DNT/95+244+RA+	196	-0.256	0.133	0.055	NA	FALSE
T Cell	DNT	DNT/27+95+244+RA+	194	-0.363	0.136	8.23e-03	NA	FALSE
T Cell	DNT	DNT/27-28+95+244+RA+	197	-0.32	0.192	0.098	NA	FALSE
T Cell	DNT	DNT/28+95+244+RA+	196	-0.281	0.16	0.08	NA	FALSE
T Cell	DNT	DNT/27+28+95+244+RA+	195	-0.291	0.168	0.085	NA	FALSE
T Cell	DNT	DNT/27-28-31+95+244+RA+	196	-0.335	0.263	0.204	NA	FALSE
T Cell	DNT	DNT/28-31+95+244+RA+	197	-0.349	0.209	0.097	NA	FALSE
T Cell	DNT	DNT/27+28-31+95+244+RA+	196	-0.442	0.182	0.016	NA	FALSE
T Cell	DNT	DNT/27-31+95+244+RA+	196	-0.29	0.218	0.185	NA	FALSE
T Cell	CD8	CD8/27+28-57-95-	220	0.149	0.184	0.42	NA	FALSE
T Cell	DNT	DNT/31+95+244+RA+	197	-0.214	0.144	0.14	NA	FALSE
T Cell	DNT	DNT/27+31+95+244+RA+	195	-0.276	0.144	0.056	NA	FALSE
T Cell	DNT	DNT/27-28+31+95+244+RA+	196	-0.325	0.197	0.102	NA	FALSE
T Cell	DNT	DNT/28+31+95+244+RA+	197	-0.201	0.164	0.221	NA	FALSE
T Cell	DNT	DNT/27+28+31+95+244+RA+	196	-0.199	0.172	0.249	NA	FALSE
T Cell	DNT	DNT/27-28-31-57+95+244+RA+	195	-0.139	0.365	0.704	NA	FALSE
T Cell	DNT	DNT/28-31-57+95+244+RA+	195	-0.238	0.324	0.464	NA	FALSE
T Cell	CD8	CD8/27-57-95-	222	0.093	0.182	0.61	NA	FALSE
T Cell	DNT	DNT/27-31-57+95+244+RA+	195	-0.116	0.357	0.745	NA	FALSE
T Cell	DNT	DNT/31-57+95+244+RA+	195	-0.214	0.312	0.493	NA	FALSE
T Cell	DNT	DNT/27-28-57+95+244+RA+	197	-0.248	0.34	0.467	NA	FALSE
T Cell	DNT	DNT/28-57+95+244+RA+	197	-0.258	0.294	0.38	NA	FALSE
T Cell	DNT	DNT/27+28-57+95+244+RA+	189	-0.312	0.263	0.237	NA	FALSE
T Cell	CD8	CD8/57-95-	220	0.04	0.138	0.772	NA	FALSE
T Cell	DNT	DNT/27-57+95+244+RA+	197	-0.244	0.331	0.462	NA	FALSE
T Cell	DNT	DNT/57+95+244+RA+	197	-0.213	0.26	0.414	NA	FALSE
T Cell	DNT	DNT/27+57+95+244+RA+	195	-0.177	0.23	0.443	NA	FALSE
T Cell	DNT	DNT/28+57+95+244+RA+	191	-0.163	0.203	0.424	NA	FALSE
T Cell	DNT	DNT/27+28+57+95+244+RA+	190	-0.053	0.219	0.808	NA	FALSE
T Cell	CD4	CD4/27-95-RA-	218	0.144	0.137	0.297	NA	FALSE
T Cell	DNT	DNT/27-28-31+57+95+244+RA+	194	-0.166	0.343	0.629	NA	FALSE
T Cell	DNT	DNT/28-31+57+95+244+RA+	195	-0.268	0.287	0.352	NA	FALSE
T Cell	CD8	CD8/27+57-95-	220	0.031	0.145	0.831	NA	FALSE
T Cell	DNT	DNT/27-31+57+95+244+RA+	196	-0.272	0.332	0.414	NA	FALSE
T Cell	DNT	DNT/31+57+95+244+RA+	197	-0.196	0.248	0.43	NA	FALSE
T Cell	DNT	DNT/27+31+57+95+244+RA+	195	-0.161	0.225	0.476	NA	FALSE
T Cell	DNT	DNT/28+31+57+95+244+RA+	190	-0.208	0.204	0.309	NA	FALSE
T Cell	DNT	DNT/27+28+31+57+95+244+RA+	189	-0.119	0.217	0.586	NA	FALSE
T Cell	DNT	DNT/28-31-57-95-127+244+RA+	194	-0.561	0.26	0.032	NA	FALSE
T Cell	CD4	CD4/95-RA-	220	0.272	0.126	0.032	NA	FALSE
T Cell	DNT	DNT/27-31-57-95-127+244+RA+	194	-0.611	0.265	0.022	NA	FALSE
T Cell	DNT	DNT/31-57-95-127+244+RA+	196	-0.594	0.233	0.012	NA	FALSE
T Cell	CD8	CD8/27-28+57-95-	223	0.147	0.233	0.53	NA	FALSE
T Cell	DNT	DNT/27+31-57-95-127+244+RA+	195	-0.681	0.26	9.48e-03	NA	FALSE
T Cell	DNT	DNT/28+31-57-95-127+244+RA+	193	-0.46	0.248	0.065	NA	FALSE
T Cell	DNT	DNT/27-28-57-95-127+244+RA+	196	-0.532	0.234	0.024	NA	FALSE
T Cell	DNT	DNT/28-57-95-127+244+RA+	197	-0.53	0.227	0.021	NA	FALSE
T Cell	DNT	DNT/27+28-57-95-127+244+RA+	196	-0.626	0.272	0.023	NA	FALSE
T Cell	DNT	DNT/27-57-95-127+244+RA+	197	-0.539	0.224	0.017	NA	FALSE
T Cell	DNT	DNT/57-95-127+244+RA+	197	-0.512	0.196	9.67e-03	NA	FALSE
T Cell	DNT	DNT/27+57-95-127+244+RA+	197	-0.531	0.222	0.018	NA	FALSE
T Cell	CD4	CD4/27+95-RA-	220	0.302	0.131	0.022	NA	FALSE
T Cell	CD8	CD8/28+57-95-	220	0.026	0.145	0.856	NA	FALSE
T Cell	DNT	DNT/28+57-95-127+244+RA+	195	-0.409	0.194	0.036	NA	FALSE
T Cell	DNT	DNT/27+28+57-95-127+244+RA+	196	-0.412	0.204	0.045	NA	FALSE
T Cell	DNT	DNT/28-31+57-95-127+244+RA+	197	-0.421	0.215	0.052	NA	FALSE
T Cell	DNT	DNT/27-31+57-95-127+244+RA+	194	-0.518	0.197	9.22e-03	NA	FALSE
T Cell	DNT	DNT/31+57-95-127+244+RA+	197	-0.429	0.178	0.017	NA	FALSE
T Cell	DNT	DNT/27+31+57-95-127+244+RA+	195	-0.399	0.198	0.045	NA	FALSE
T Cell	DNT	DNT/28+31+57-95-127+244+RA+	195	-0.363	0.182	0.047	NA	FALSE
T Cell	DNT	DNT/27-28-31-95-127+244+RA+	190	-0.405	0.287	0.161	NA	FALSE
T Cell	DNT	DNT/28-31-95-127+244+RA+	195	-0.553	0.271	0.042	NA	FALSE
T Cell	CD4	CD4/27-28+95-RA-	217	0.122	0.134	0.363	NA	FALSE
T Cell	CD8	CD8/27+28+57-95-	221	0.02	0.153	0.896	NA	FALSE
T Cell	DNT	DNT/27-31-95-127+244+RA+	193	-0.494	0.27	0.069	NA	FALSE
T Cell	DNT	DNT/31-95-127+244+RA+	196	-0.603	0.235	0.011	NA	FALSE
T Cell	DNT	DNT/27+31-95-127+244+RA+	195	-0.693	0.261	8.68e-03	NA	FALSE
T Cell	DNT	DNT/28+31-95-127+244+RA+	193	-0.465	0.249	0.063	NA	FALSE
T Cell	DNT	DNT/27-28-95-127+244+RA+	196	-0.549	0.241	0.024	NA	FALSE
T Cell	DNT	DNT/28-95-127+244+RA+	197	-0.524	0.231	0.025	NA	FALSE
T Cell	DNT	DNT/27+28-95-127+244+RA+	197	-0.628	0.275	0.024	NA	FALSE
T Cell	CD8	CD8/27-28-31+57-95-	218	-0.092	0.186	0.62	NA	FALSE
T Cell	CD4	CD4/28+95-RA-	220	0.269	0.125	0.033	NA	FALSE
T Cell	DNT	DNT/27-95-127+244+RA+	197	-0.561	0.23	0.016	NA	FALSE
T Cell	DNT	DNT/95-127+244+RA+	197	-0.506	0.198	0.012	NA	FALSE
T Cell	DNT	DNT/27+95-127+244+RA+	197	-0.542	0.224	0.016	NA	FALSE
T Cell	DNT	DNT/28+95-127+244+RA+	195	-0.415	0.194	0.034	NA	FALSE
T Cell	DNT	DNT/27+28+95-127+244+RA+	196	-0.413	0.204	0.045	NA	FALSE
T Cell	DNT	DNT/27-28-31+95-127+244+RA+	192	-0.518	0.214	0.016	NA	FALSE
T Cell	DNT	DNT/28-31+95-127+244+RA+	197	-0.42	0.219	0.057	NA	FALSE
T Cell	DNT	DNT/27+28-31+95-127+244+RA+	192	-0.539	0.263	0.042	NA	FALSE
T Cell	CD4	CD4/27+28+57-95-127-244-RA-	220	0.11	0.113	0.333	NA	FALSE
T Cell	DNT	DNT/27-31+95-127+244+RA+	195	-0.515	0.204	0.012	NA	FALSE
T Cell	CD4	CD4/27+28+95-RA-	220	0.292	0.129	0.025	NA	FALSE
T Cell	DNT	DNT/31+95-127+244+RA+	197	-0.418	0.179	0.021	NA	FALSE
T Cell	DNT	DNT/27+31+95-127+244+RA+	196	-0.43	0.204	0.036	NA	FALSE
T Cell	DNT	DNT/28+31+95-127+244+RA+	195	-0.368	0.182	0.044	NA	FALSE
T Cell	DNT	DNT/27+28+31+95-127+244+RA+	195	-0.336	0.192	0.082	NA	FALSE
T Cell	CD8	CD8/28-31+57-95-	222	0.037	0.198	0.853	NA	FALSE
T Cell	CD8	CD8/27+28-31+57-95-	221	0.036	0.219	0.871	NA	FALSE
T Cell	DNT	DNT/27-28-31-57-127+244+RA+	196	-0.615	0.223	6.52e-03	NA	FALSE
T Cell	DNT	DNT/28-31-57-127+244+RA+	197	-0.668	0.196	7.95e-04	NA	FALSE
T Cell	CD8	CD8/27-31+57-95-	222	-0.125	0.211	0.554	NA	FALSE
T Cell	DNT	DNT/27+28-31-57-127+244+RA+	196	-0.602	0.239	0.013	NA	FALSE
T Cell	DNT	DNT/27-31-57-127+244+RA+	196	-0.438	0.186	0.019	NA	FALSE
T Cell	DNT	DNT/31-57-127+244+RA+	197	-0.494	0.163	2.89e-03	NA	FALSE
T Cell	DNT	DNT/27+31-57-127+244+RA+	196	-0.454	0.193	0.02	NA	FALSE
T Cell	DNT	DNT/27-28+31-57-127+244+RA+	195	-0.317	0.218	0.147	NA	FALSE
T Cell	DNT	DNT/28+31-57-127+244+RA+	196	-0.332	0.196	0.091	NA	FALSE
T Cell	DNT	DNT/27+28+31-57-127+244+RA+	194	-0.263	0.201	0.192	NA	FALSE
T Cell	DNT	DNT/27-28-57-127+244+RA+	196	-0.511	0.192	8.66e-03	NA	FALSE
T Cell	CD8	CD8/31+57-95-	221	-0.119	0.172	0.491	NA	FALSE
T Cell	DNT	DNT/28-57-127+244+RA+	197	-0.519	0.168	2.35e-03	NA	FALSE
T Cell	DNT	DNT/27+28-57-127+244+RA+	197	-0.426	0.207	0.041	NA	FALSE
T Cell	DNT	DNT/27-57-127+244+RA+	196	-0.39	0.169	0.022	NA	FALSE
T Cell	DNT	DNT/57-127+244+RA+	197	-0.355	0.144	0.014	NA	FALSE
T Cell	DNT	DNT/27+57-127+244+RA+	195	-0.323	0.166	0.054	NA	FALSE
T Cell	DNT	DNT/27-28+57-127+244+RA+	197	-0.289	0.207	0.165	NA	FALSE
T Cell	DNT	DNT/28+57-127+244+RA+	195	-0.273	0.168	0.107	NA	FALSE
T Cell	DNT	DNT/27+28+57-127+244+RA+	194	-0.286	0.174	0.103	NA	FALSE
T Cell	DNT	DNT/27-28-31+57-127+244+RA+	196	-0.479	0.2	0.017	NA	FALSE
T Cell	CD8	CD8/27+31+57-95-	221	-0.117	0.175	0.503	NA	FALSE
T Cell	DNT	DNT/28-31+57-127+244+RA+	197	-0.423	0.169	0.013	NA	FALSE
T Cell	DNT	DNT/27+28-31+57-127+244+RA+	196	-0.358	0.194	0.068	NA	FALSE
T Cell	DNT	DNT/27-31+57-127+244+RA+	196	-0.359	0.169	0.035	NA	FALSE
T Cell	DNT	DNT/31+57-127+244+RA+	197	-0.214	0.147	0.146	NA	FALSE
T Cell	DNT	DNT/27+31+57-127+244+RA+	196	-0.177	0.169	0.297	NA	FALSE
T Cell	DNT	DNT/27-28+31+57-127+244+RA+	196	-0.274	0.216	0.207	NA	FALSE
T Cell	DNT	DNT/28+31+57-127+244+RA+	196	-0.173	0.173	0.319	NA	FALSE
T Cell	CD4	CD4/31+95-RA-	220	0.229	0.15	0.128	NA	FALSE
T Cell	DNT	DNT/27+28+31+57-127+244+RA+	195	-0.158	0.184	0.392	NA	FALSE
T Cell	DNT	DNT/27-28-31-127+244+RA+	196	-0.592	0.232	0.012	NA	FALSE
T Cell	CD8	CD8/27-28+31+57-95-	222	-0.127	0.263	0.629	NA	FALSE
T Cell	DNT	DNT/28-31-127+244+RA+	197	-0.661	0.2	1.14e-03	NA	FALSE
T Cell	DNT	DNT/27+28-31-127+244+RA+	196	-0.606	0.241	0.013	NA	FALSE
T Cell	DNT	DNT/27-31-127+244+RA+	196	-0.44	0.189	0.021	NA	FALSE
T Cell	DNT	DNT/31-127+244+RA+	197	-0.486	0.162	3.09e-03	NA	FALSE
T Cell	DNT	DNT/27+31-127+244+RA+	196	-0.45	0.194	0.021	NA	FALSE
T Cell	DNT	DNT/27-28+31-127+244+RA+	195	-0.312	0.217	0.152	NA	FALSE
T Cell	DNT	DNT/28+31-127+244+RA+	196	-0.326	0.195	0.096	NA	FALSE
T Cell	DNT	DNT/27+28+31-127+244+RA+	194	-0.252	0.201	0.21	NA	FALSE
T Cell	CD4	CD4/27+31+95-RA-	220	0.274	0.161	0.089	NA	FALSE
T Cell	DNT	DNT/27-28-127+244+RA+	197	-0.574	0.2	4.52e-03	NA	FALSE
T Cell	CD8	CD8/28+31+57-95-	222	-0.108	0.179	0.546	NA	FALSE
T Cell	DNT	DNT/28-127+244+RA+	197	-0.477	0.17	5.51e-03	NA	FALSE
T Cell	DNT	DNT/27+28-127+244+RA+	197	-0.41	0.208	0.05	NA	FALSE
T Cell	DNT	DNT/27-127+244+RA+	196	-0.366	0.173	0.036	NA	FALSE
T Cell	DNT	DNT/127+244+RA+	197	-0.325	0.141	0.022	NA	FALSE
T Cell	DNT	DNT/27+127+244+RA+	195	-0.311	0.166	0.063	NA	FALSE
T Cell	DNT	DNT/27-28+127+244+RA+	197	-0.283	0.207	0.173	NA	FALSE
T Cell	DNT	DNT/28+127+244+RA+	195	-0.264	0.168	0.118	NA	FALSE
T Cell	DNT	DNT/27+28+127+244+RA+	194	-0.274	0.174	0.116	NA	FALSE
T Cell	DNT	DNT/27-28-31+127+244+RA+	196	-0.447	0.206	0.032	NA	FALSE
T Cell	CD8	CD8/27+28+31+57-95-	222	-0.107	0.179	0.55	NA	FALSE
T Cell	DNT	DNT/28-31+127+244+RA+	196	-0.269	0.173	0.122	NA	FALSE
T Cell	DNT	DNT/27+28-31+127+244+RA+	196	-0.326	0.195	0.096	NA	FALSE
T Cell	DNT	DNT/27-31+127+244+RA+	197	-0.323	0.176	0.068	NA	FALSE
T Cell	DNT	DNT/31+127+244+RA+	197	-0.171	0.144	0.234	NA	FALSE
T Cell	DNT	DNT/27+31+127+244+RA+	196	-0.164	0.168	0.332	NA	FALSE
T Cell	DNT	DNT/27-28+31+127+244+RA+	196	-0.26	0.216	0.23	NA	FALSE
T Cell	DNT	DNT/28+31+127+244+RA+	196	-0.164	0.173	0.345	NA	FALSE
T Cell	DNT	DNT/27+28+31+127+244+RA+	194	-0.163	0.179	0.361	NA	FALSE
T Cell	CD8	CD8/27-28-31-95-	222	0.086	0.213	0.687	NA	FALSE
T Cell	CD4	CD4/28+31+95-RA-	220	0.234	0.152	0.126	NA	FALSE
T Cell	CD8	CD8/28-31-95-	221	0.251	0.19	0.189	NA	FALSE
T Cell	CD4	CD4/27+28+31+95-RA-	220	0.26	0.16	0.106	NA	FALSE
T Cell	DNT	DNT/57+127+244+RA+	189	-0.275	0.256	0.285	NA	FALSE
T Cell	DNT	DNT/28-31-57-95+127+244+RA+	196	-0.511	0.187	6.86e-03	NA	FALSE
T Cell	DNT	DNT/27-31-57-95+127+244+RA+	196	-0.381	0.193	0.05	NA	FALSE
T Cell	CD8	CD8/27+28-31-95-	220	0.297	0.23	0.199	NA	FALSE
T Cell	DNT	DNT/31-57-95+127+244+RA+	196	-0.432	0.169	0.011	NA	FALSE
T Cell	DNT	DNT/27+31-57-95+127+244+RA+	194	-0.4	0.189	0.036	NA	FALSE
T Cell	DNT	DNT/28+31-57-95+127+244+RA+	196	-0.293	0.205	0.156	NA	FALSE
T Cell	DNT	DNT/27-28-57-95+127+244+RA+	195	-0.453	0.211	0.033	NA	FALSE
T Cell	DNT	DNT/28-57-95+127+244+RA+	197	-0.424	0.169	0.013	NA	FALSE
T Cell	DNT	DNT/27+28-57-95+127+244+RA+	196	-0.293	0.191	0.128	NA	FALSE
T Cell	DNT	DNT/27-57-95+127+244+RA+	197	-0.404	0.184	0.029	NA	FALSE
T Cell	DNT	DNT/57-95+127+244+RA+	196	-0.294	0.152	0.054	NA	FALSE
T Cell	DNT	DNT/27+57-95+127+244+RA+	195	-0.249	0.173	0.152	NA	FALSE
T Cell	CD8	CD8/27-31-95-	222	0.286	0.203	0.16	NA	FALSE
T Cell	DNT	DNT/27-28+57-95+127+244+RA+	197	-0.266	0.213	0.214	NA	FALSE
T Cell	DNT	DNT/28+57-95+127+244+RA+	196	-0.239	0.184	0.195	NA	FALSE
T Cell	DNT	DNT/27+28+57-95+127+244+RA+	194	-0.263	0.187	0.161	NA	FALSE
T Cell	DNT	DNT/28-31+57-95+127+244+RA+	197	-0.351	0.198	0.078	NA	FALSE
T Cell	DNT	DNT/27-31+57-95+127+244+RA+	196	-0.273	0.197	0.167	NA	FALSE
T Cell	DNT	DNT/31+57-95+127+244+RA+	197	-0.144	0.167	0.39	NA	FALSE
T Cell	DNT	DNT/27+31+57-95+127+244+RA+	196	-0.11	0.185	0.554	NA	FALSE
T Cell	DNT	DNT/28+31+57-95+127+244+RA+	197	-0.129	0.193	0.506	NA	FALSE
T Cell	DNT	DNT/27-28-31-95+127+244+RA+	194	-0.541	0.238	0.024	NA	FALSE
T Cell	CD8	CD8/31-95-	222	0.446	0.227	0.051	NA	FALSE
T Cell	DNT	DNT/28-31-95+127+244+RA+	196	-0.48	0.19	0.012	NA	FALSE
T Cell	DNT	DNT/27+28-31-95+127+244+RA+	194	-0.477	0.22	0.032	NA	FALSE
T Cell	DNT	DNT/27-31-95+127+244+RA+	196	-0.372	0.195	0.057	NA	FALSE
T Cell	DNT	DNT/31-95+127+244+RA+	196	-0.416	0.165	0.013	NA	FALSE
T Cell	DNT	DNT/27+31-95+127+244+RA+	194	-0.391	0.19	0.041	NA	FALSE
T Cell	DNT	DNT/27+28-31+57-95+127-244+RA-	190	-0.492	0.234	0.037	NA	FALSE
T Cell	DNT	DNT/27-28+31-95+127+244+RA+	196	-0.271	0.226	0.231	NA	FALSE
T Cell	DNT	DNT/28+31-95+127+244+RA+	196	-0.286	0.205	0.164	NA	FALSE
T Cell	DNT	DNT/27+28+31-95+127+244+RA+	195	-0.346	0.213	0.106	NA	FALSE
T Cell	CD8	CD8/27+31-95-	223	0.53	0.259	0.042	NA	FALSE
[truncated: 33,652 more rows]
