# Supplementary material for: Immune Trait Shifts in Association With Tobacco Smoking: A Study in Healthy Women
Source: Front Immunol. 2021 Mar 9;12:637974. doi: 10.3389/fimmu.2021.637974 (PMC7985448; doi:10.3389/fimmu.2021.637974)
Supplement: Supplementary file 2 [file Data_Sheet_2.CSV]

population	Lineage	Subset.name	N	Beta	SE	P
TCell	CD8	CD8/27-28+31+57-95+127+244-RA-	197	0.005	0.008	0.489
TCell	CD4	CD4/27+31+57-127-244-RA+	196	-0.008	0.006	0.175
TCell	CD4	CD4/27+28+31+57-127-244-RA+	196	-0.008	0.006	0.152
TCell	CD4	CD4/27+31+127-244-RA+	197	-0.008	0.006	0.13
TCell	CD4	CD4/28+31+127-244-RA+	197	-0.008	0.005	0.122
TCell	CD4	CD4/27+28+31+127-244-RA+	197	-0.009	0.006	0.112
TCell	CD4	CD4/27+31+57-127-RA+	196	-0.007	0.005	0.181
TCell	CD4	CD4/28+31+57-127-RA+	197	-0.008	0.005	0.133
TCell	CD4	CD4/27+28+31+57-127-RA+	196	-0.008	0.005	0.158
TCell	CD4	CD4/27+31+127-RA+	196	-0.007	0.005	0.16
TCell	CD4	CD4/28+31+127-RA+	197	-0.007	0.005	0.162
TCell	CD4	CD4/27+28+31+127-RA+	197	-0.009	0.006	0.118
TCell	CD8	CD8/27-28+31-57-95+127+244-RA-	196	0.006	0.007	0.408
TCell	CD8	CD8/27-31-57-244-RA-	196	-0.001	0.007	0.933
TCell	CD8	CD8/31-57-244-RA-	197	0.006	0.006	0.332
TCell	CD8	CD8/27-28+31-57-244-RA-	196	0.002	0.007	0.708
TCell	CD8	CD8/28+31-57-244-RA-	197	0.008	0.006	0.222
TCell	CD8	CD8/27-57-244-RA-	196	-0.001	0.006	0.906
TCell	CD8	CD8/57-244-RA-	196	0.006	0.005	0.298
TCell	CD8	CD8/27-28+57-244-RA-	196	0.002	0.006	0.781
TCell	CD8	CD8/28+57-244-RA-	197	0.006	0.006	0.287
TCell	CD8	CD8/27-31-244-RA-	196	-0.001	0.007	0.933
TCell	CD8	CD8/31-244-RA-	197	0.006	0.006	0.358
TCell	CD8	CD8/27-28+31-244-RA-	196	0.003	0.007	0.708
TCell	CD8	CD8/28+31-244-RA-	197	0.007	0.006	0.224
TCell	CD8	CD8/27-244-RA-	196	-0.001	0.006	0.925
TCell	CD8	CD8/244-RA-	196	0.005	0.005	0.322
TCell	CD8	CD8/27-28+244-RA-	196	0.002	0.006	0.791
TCell	CD8	CD8/27-31-57-95+244-RA-	196	-0.001	0.007	0.936
TCell	CD8	CD8/27-28+31-57-95+244-RA-	196	0.002	0.007	0.717
TCell	CD8	CD8/28+31-57-95+244-RA-	197	0.007	0.006	0.258
TCell	CD8	CD8/27-57-95+244-RA-	196	-0.001	0.006	0.906
TCell	CD8	CD8/27-28+57-95+244-RA-	196	0.002	0.006	0.791
TCell	CD8	CD8/27-31-95+244-RA-	196	-0.001	0.007	0.938
TCell	CD8	CD8/27-28+31-95+244-RA-	196	0.002	0.007	0.716
TCell	CD8	CD8/28+31-95+244-RA-	197	0.007	0.006	0.26
TCell	CD8	CD8/27-95+244-RA-	196	-0.001	0.006	0.928
TCell	CD8	CD8/27-28+95+244-RA-	196	0.002	0.006	0.801
TCell	CD8	CD8/27-31-57-127+244-RA-	196	0.005	0.007	0.455
TCell	CD8	CD8/31-57-127+244-RA-	197	0.009	0.006	0.158
TCell	CD8	CD8/27-28+31-57-127+244-RA-	196	0.006	0.007	0.411
TCell	CD8	CD8/28+31-57-127+244-RA-	197	0.009	0.006	0.146
TCell	CD8	CD8/27-57-127+244-RA-	196	0.004	0.007	0.52
TCell	CD8	CD8/57-127+244-RA-	197	0.008	0.006	0.189
TCell	CD8	CD8/27-28+57-127+244-RA-	196	0.005	0.007	0.463
TCell	CD8	CD8/28+57-127+244-RA-	197	0.008	0.006	0.174
TCell	CD8	CD8/27-31+57-127+244-RA-	197	0.004	0.008	0.58
TCell	CD8	CD8/27-28+31+57-127+244-RA-	197	0.005	0.008	0.497
TCell	CD8	CD8/27-31-127+244-RA-	196	0.005	0.007	0.463
TCell	CD8	CD8/31-127+244-RA-	197	0.009	0.006	0.159
TCell	CD8	CD8/27-28+31-127+244-RA-	196	0.006	0.007	0.413
TCell	CD8	CD8/28+31-127+244-RA-	197	0.009	0.006	0.147
TCell	CD8	CD8/27-127+244-RA-	196	0.004	0.007	0.533
TCell	CD8	CD8/127+244-RA-	197	0.008	0.006	0.194
TCell	CD8	CD8/27-28+127+244-RA-	196	0.005	0.007	0.47
TCell	CD8	CD8/28+127+244-RA-	197	0.008	0.006	0.178
TCell	CD8	CD8/27-31+127+244-RA-	197	0.004	0.008	0.591
TCell	CD8	CD8/27-28+31+127+244-RA-	197	0.005	0.008	0.501
TCell	CD8	CD8/27-31-57-95+127+244-RA-	196	0.005	0.007	0.449
TCell	CD8	CD8/31-57-95+127+244-RA-	197	0.009	0.006	0.177
TCell	CD8	CD8/28+31-57-95+127+244-RA-	197	0.009	0.006	0.167
TCell	CD8	CD8/27-57-95+127+244-RA-	196	0.004	0.007	0.513
TCell	CD8	CD8/57-95+127+244-RA-	197	0.008	0.006	0.208
TCell	CD8	CD8/27-28+57-95+127+244-RA-	196	0.005	0.007	0.46
TCell	CD8	CD8/28+57-95+127+244-RA-	197	0.008	0.006	0.195
TCell	CD8	CD8/27-31+57-95+127+244-RA-	197	0.004	0.008	0.57
TCell	CD8	CD8/27-31-95+127+244-RA-	196	0.005	0.007	0.456
TCell	CD8	CD8/31-95+127+244-RA-	197	0.009	0.006	0.178
TCell	CD8	CD8/27-28+31-95+127+244-RA-	196	0.006	0.007	0.411
TCell	CD8	CD8/28+31-95+127+244-RA-	197	0.009	0.006	0.168
TCell	CD8	CD8/27-95+127+244-RA-	196	0.004	0.007	0.526
TCell	CD8	CD8/95+127+244-RA-	197	0.008	0.006	0.214
TCell	CD8	CD8/27-28+95+127+244-RA-	196	0.005	0.007	0.467
TCell	CD8	CD8/28+95+127+244-RA-	197	0.008	0.006	0.199
TCell	CD8	CD8/27-31+95+127+244-RA-	197	0.004	0.008	0.581
TCell	CD8	CD8/27-28+31+95+127+244-RA-	197	0.005	0.008	0.493
TCell	CD8	CD8/27-28+31-57-244-	196	0.004	0.007	0.513
TCell	CD8	CD8/27-28+31-244-	196	0.004	0.007	0.515
TCell	CD8	CD8/27-31-57-95+244-	196	-0.001	0.007	0.878
TCell	CD8	CD8/31-57-95+244-	197	0.005	0.006	0.392
TCell	CD8	CD8/27-28+31-57-95+244-	196	0.003	0.006	0.611
TCell	CD8	CD8/28+31-57-95+244-	197	0.007	0.006	0.225
TCell	CD8	CD8/27+28+31-57-95+244-	197	0.008	0.006	0.174
TCell	CD8	CD8/27-57-95+244-	196	-0.002	0.006	0.761
TCell	CD8	CD8/27-28+57-95+244-	196	0.002	0.006	0.762
TCell	CD8	CD8/27-31-95+244-	196	-0.001	0.007	0.904
TCell	CD8	CD8/31-95+244-	197	0.005	0.006	0.425
TCell	CD8	CD8/27-28+31-95+244-	196	0.003	0.006	0.614
TCell	CD8	CD8/28+31-95+244-	197	0.007	0.006	0.227
TCell	CD8	CD8/27+28+31-95+244-	197	0.008	0.006	0.175
TCell	CD8	CD8/27-95+244-	196	-0.002	0.006	0.806
TCell	CD8	CD8/27-28+95+244-	196	0.002	0.006	0.773
TCell	CD8	CD8/27-31-57-127+244-	196	0.005	0.007	0.449
TCell	CD8	CD8/27-28+31-57-127+244-	196	0.007	0.007	0.323
TCell	CD8	CD8/27-31-127+244-	196	0.005	0.007	0.487
TCell	CD8	CD8/27-28+31-127+244-	196	0.007	0.007	0.327
TCell	CD8	CD8/25+38-39-73-DR-	196	0.01	0.007	0.16
TCell	CD8	CD8/25+39-73-DR-	196	0.01	0.007	0.157
TCell	CD8	CD8/25+38-73-DR-	196	0.01	0.007	0.148
TCell	CD8	CD8/25+73-DR-	196	0.01	0.007	0.141
TCell	CD8	CD8/25+38-39-DR-	195	0.006	0.006	0.386
TCell	CD8	CD8/25-39-DR-	191	0	0	0.784
TCell	CD8	CD8/25+39-DR-	195	0.005	0.006	0.4
TCell	CD8	CD8/25+38-DR-	195	0.006	0.006	0.359
TCell	CD8	CD8/25-DR-	191	0	0	0.848
TCell	CD8	CD8/25+DR-	195	0.006	0.006	0.369
TCell	CD8	CD8/25+38-39-73+DR-	195	0.005	0.006	0.447
TCell	CD8	CD8/25+39-73+DR-	195	0.004	0.006	0.481
TCell	CD8	CD8/25+38-73+DR-	195	0.006	0.006	0.363
TCell	CD8	CD8/25+73+DR-	195	0.005	0.006	0.388
TCell	CD8	CD8/25+38-39-73-127+DR-	196	0.01	0.007	0.168
TCell	CD8	CD8/25+39-73-127+DR-	196	0.01	0.007	0.175
TCell	CD8	CD8/25+38-73-127+DR-	196	0.01	0.007	0.165
TCell	CD8	CD8/25+73-127+DR-	196	0.01	0.007	0.175
TCell	CD8	CD8/25+38-39-127+DR-	195	0.006	0.007	0.39
TCell	CD8	CD8/25+39-127+DR-	195	0.005	0.006	0.414
TCell	CD8	CD8/25+38-127+DR-	195	0.006	0.006	0.382
TCell	CD8	CD8/25+127+DR-	195	0.005	0.006	0.412
TCell	CD8	CD8/25+38-39-73+127+DR-	195	0.005	0.006	0.452
TCell	CD8	CD8/25+39-73+127+DR-	195	0.004	0.006	0.496
TCell	CD8	CD8/25+38-73+127+DR-	195	0.005	0.006	0.395
TCell	CD8	CD8/25+73+127+DR-	195	0.005	0.006	0.445
TCell	CD4	CD4/25-38+73-127-DR-PD1-RO-	196	-0.013	0.005	0.013
TCell	CD4	CD4/38+73-127-DR-PD1-RO-	196	-0.013	0.005	0.012
TCell	CD8	CD8/25+38-39-73-	196	0.01	0.007	0.173
TCell	CD8	CD8/25+39-73-	196	0.01	0.007	0.168
TCell	CD8	CD8/25+38-73-	196	0.01	0.007	0.154
TCell	CD8	CD8/25+73-	196	0.01	0.007	0.145
TCell	CD8	CD8/25+38-39-	195	0.005	0.006	0.431
TCell	CD8	CD8/25-39-	192	0	0	0.499
TCell	CD8	CD8/25+39-	195	0.005	0.006	0.446
TCell	CD8	CD8/25+38-	195	0.005	0.006	0.389
TCell	CD8	CD8/25-	191	0	0	0.144
TCell	CD8	CD8/25+	195	0.005	0.006	0.399
TCell	CD8	CD8/25+38-39-73+	195	0.004	0.006	0.5
TCell	CD8	CD8/25+39-73+	195	0.004	0.006	0.539
TCell	CD8	CD8/25+38-73+	195	0.005	0.006	0.406
TCell	CD8	CD8/25+73+	195	0.005	0.006	0.429
TCell	CD8	CD8/25+38-39-73-127+	196	0.01	0.007	0.173
TCell	CD8	CD8/25+39-73-127+	196	0.01	0.007	0.181
TCell	CD8	CD8/25+38-73-127+	196	0.01	0.007	0.168
TCell	CD8	CD8/25+73-127+	196	0.01	0.007	0.18
TCell	CD8	CD8/25+38-39-127+	195	0.005	0.006	0.422
TCell	CD8	CD8/25+39-127+	195	0.005	0.006	0.448
TCell	CD8	CD8/25+38-127+	195	0.005	0.006	0.408
TCell	CD8	CD8/25+127+	195	0.005	0.006	0.443
TCell	CD8	CD8/25+38-39-73+127+	195	0.004	0.006	0.5
TCell	CD8	CD8/25+39-73+127+	195	0.004	0.006	0.547
TCell	CD8	CD8/25+38-73+127+	195	0.005	0.006	0.442
TCell	CD4	CD4/25-38+127-DR-PD1-RO-	196	-0.013	0.005	0.014
TCell	CD8	CD8/25+73+127+	195	0.004	0.006	0.491
TCell	CD4	CD4/38+127-DR-PD1-RO-	196	-0.013	0.005	0.012
TCell	CD8	CD8/25+38-39-73-DR-PD1-RO+	196	0.011	0.008	0.161
TCell	CD8	CD8/25+39-73-DR-PD1-RO+	196	0.011	0.008	0.15
TCell	CD8	CD8/25+38-73-DR-PD1-RO+	196	0.011	0.008	0.152
TCell	CD8	CD8/25+73-DR-PD1-RO+	196	0.011	0.008	0.14
TCell	CD8	CD8/25+38-39-DR-PD1-RO+	195	0.007	0.007	0.339
TCell	CD8	CD8/25+39-DR-PD1-RO+	195	0.007	0.007	0.336
TCell	CD8	CD8/25+38-DR-PD1-RO+	195	0.007	0.007	0.328
TCell	CD8	CD8/25+DR-PD1-RO+	196	0.011	0.007	0.124
TCell	CD8	CD8/25+38-39-73+DR-PD1-RO+	195	0.007	0.007	0.37
TCell	CD8	CD8/25+39-73+DR-PD1-RO+	195	0.006	0.007	0.406
TCell	CD8	CD8/25+38-73+DR-PD1-RO+	195	0.007	0.007	0.299
TCell	CD8	CD8/25+73+DR-PD1-RO+	195	0.007	0.007	0.336
TCell	CD8	CD8/25+39-73-127+DR-PD1-RO+	196	0.011	0.008	0.157
TCell	CD8	CD8/25+38-73-127+DR-PD1-RO+	196	0.011	0.008	0.158
TCell	CD8	CD8/25+73-127+DR-PD1-RO+	196	0.011	0.008	0.166
TCell	CD8	CD8/25+38-39-127+DR-PD1-RO+	195	0.007	0.007	0.336
TCell	CD8	CD8/25+39-127+DR-PD1-RO+	195	0.007	0.007	0.347
TCell	CD8	CD8/25+38-127+DR-PD1-RO+	195	0.007	0.007	0.343
TCell	CD8	CD8/25+127+DR-PD1-RO+	196	0.01	0.007	0.14
TCell	CD8	CD8/25+39-73+127+DR-PD1-RO+	195	0.006	0.007	0.405
TCell	CD8	CD8/25+38-73+127+DR-PD1-RO+	195	0.007	0.007	0.334
TCell	CD8	CD8/25+73+127+DR-PD1-RO+	195	0.006	0.007	0.379
TCell	CD8	CD8/25+38-39-73-PD1-RO+	196	0.011	0.008	0.169
TCell	CD8	CD8/25+39-73-PD1-RO+	196	0.011	0.008	0.157
TCell	CD8	CD8/25+38-73-PD1-RO+	196	0.011	0.008	0.152
TCell	CD8	CD8/25+73-PD1-RO+	196	0.011	0.007	0.139
TCell	CD8	CD8/25+38-39-PD1-RO+	195	0.006	0.007	0.364
TCell	CD8	CD8/25+39-PD1-RO+	195	0.006	0.007	0.364
TCell	CD8	CD8/25+38-PD1-RO+	195	0.007	0.007	0.348
TCell	CD8	CD8/25+PD1-RO+	196	0.01	0.007	0.135
TCell	CD8	CD8/25+38-39-73+PD1-RO+	195	0.006	0.007	0.401
TCell	CD8	CD8/25+39-73+PD1-RO+	195	0.006	0.007	0.445
TCell	CD8	CD8/25+38-73+PD1-RO+	195	0.007	0.007	0.336
TCell	CD8	CD8/25+73+PD1-RO+	195	0.006	0.007	0.38
TCell	CD8	CD8/25+38-39-73-127+PD1-RO+	196	0.011	0.008	0.165
TCell	CD8	CD8/25+39-73-127+PD1-RO+	196	0.011	0.008	0.163
TCell	CD8	CD8/25+38-73-127+PD1-RO+	196	0.011	0.008	0.159
TCell	CD8	CD8/25+73-127+PD1-RO+	196	0.011	0.008	0.169
TCell	CD8	CD8/25+38-39-127+PD1-RO+	195	0.007	0.007	0.36
TCell	CD8	CD8/25+39-127+PD1-RO+	195	0.006	0.007	0.373
TCell	CD8	CD8/25+38-127+PD1-RO+	195	0.006	0.007	0.365
TCell	CD8	CD8/25+127+PD1-RO+	196	0.01	0.007	0.156
TCell	CD8	CD8/25+38-39-73+127+PD1-RO+	195	0.006	0.007	0.389
TCell	CD8	CD8/25+39-73+127+PD1-RO+	195	0.006	0.007	0.44
TCell	CD8	CD8/25+38-73+127+PD1-RO+	195	0.007	0.007	0.371
TCell	CD8	CD8/25+73+127+PD1-RO+	195	0.006	0.007	0.424
TCell	CD8	CD8/25+38-39-73-DR-RO+	196	0.011	0.008	0.162
TCell	CD8	CD8/25+39-73-DR-RO+	196	0.011	0.008	0.148
TCell	CD8	CD8/25+38-73-DR-RO+	196	0.011	0.007	0.15
TCell	CD8	CD8/25+73-DR-RO+	196	0.011	0.007	0.138
TCell	CD8	CD8/25+38-39-DR-RO+	195	0.007	0.007	0.334
TCell	CD8	CD8/25+39-DR-RO+	195	0.007	0.007	0.331
TCell	CD8	CD8/25+38-DR-RO+	195	0.007	0.007	0.319
TCell	CD8	CD8/25+DR-RO+	196	0.01	0.007	0.121
TCell	CD8	CD8/25+38-39-73+DR-RO+	195	0.007	0.007	0.346
TCell	CD8	CD8/25+39-73+DR-RO+	195	0.006	0.007	0.388
TCell	CD8	CD8/25+38-73+DR-RO+	195	0.008	0.007	0.272
TCell	CD8	CD8/25+73+DR-RO+	195	0.007	0.007	0.316
TCell	CD8	CD8/25+38-39-73-127+DR-RO+	196	0.011	0.008	0.156
TCell	CD8	CD8/25+39-73-127+DR-RO+	196	0.011	0.008	0.155
TCell	CD8	CD8/25+38-73-127+DR-RO+	196	0.011	0.008	0.154
TCell	CD8	CD8/25+73-127+DR-RO+	196	0.011	0.008	0.163
TCell	CD4	CD4/38+39-73-127-PD1-RO-	196	-0.013	0.005	8.45e-03
TCell	CD8	CD8/25+38-39-127+DR-RO+	195	0.007	0.007	0.331
TCell	CD8	CD8/25+39-127+DR-RO+	195	0.007	0.007	0.342
TCell	CD8	CD8/25+38-127+DR-RO+	195	0.007	0.007	0.332
TCell	CD8	CD8/25+127+DR-RO+	196	0.01	0.007	0.137
TCell	CD8	CD8/25+38-39-73+127+DR-RO+	195	0.007	0.007	0.34
TCell	CD8	CD8/25+39-73+127+DR-RO+	195	0.006	0.007	0.388
TCell	CD8	CD8/25+38-73+127+DR-RO+	195	0.007	0.007	0.304
TCell	CD8	CD8/25+73+127+DR-RO+	195	0.007	0.007	0.356
TCell	CD4	CD4/25-38+73-127-PD1-RO-	196	-0.013	0.005	0.01
TCell	CD4	CD4/38+73-127-PD1-RO-	196	-0.013	0.005	9.27e-03
TCell	CD8	CD8/25+38-39-73-RO+	196	0.011	0.008	0.171
TCell	CD8	CD8/25+39-73-RO+	196	0.011	0.008	0.155
TCell	CD8	CD8/25+38-73-RO+	196	0.011	0.007	0.15
TCell	CD8	CD8/25+73-RO+	196	0.011	0.007	0.138
TCell	CD8	CD8/25+38-39-RO+	195	0.006	0.007	0.361
TCell	CD8	CD8/25+39-RO+	195	0.006	0.007	0.359
TCell	CD8	CD8/25+38-RO+	195	0.007	0.007	0.338
TCell	CD8	CD8/25+RO+	196	0.01	0.007	0.133
TCell	CD8	CD8/25+38-39-73+RO+	195	0.006	0.007	0.377
TCell	CD8	CD8/25+39-73+RO+	195	0.006	0.007	0.426
TCell	CD8	CD8/25+38-73+RO+	195	0.007	0.007	0.305
TCell	CD8	CD8/25+73+RO+	195	0.006	0.007	0.358
TCell	CD8	CD8/25+38-39-73-127+RO+	196	0.011	0.008	0.164
TCell	CD8	CD8/25+39-73-127+RO+	196	0.011	0.008	0.162
TCell	CD8	CD8/25+38-73-127+RO+	196	0.011	0.008	0.157
TCell	CD8	CD8/25+73-127+RO+	196	0.01	0.008	0.167
TCell	CD8	CD8/25+38-39-127+RO+	195	0.006	0.007	0.357
TCell	CD8	CD8/25+39-127+RO+	195	0.006	0.007	0.369
TCell	CD8	CD8/25+38-127+RO+	195	0.006	0.007	0.356
TCell	CD8	CD8/25+127+RO+	196	0.01	0.007	0.152
TCell	CD4	CD4/25-38+39-127-PD1-RO-	196	-0.013	0.005	9.33e-03
TCell	CD4	CD4/38+39-127-PD1-RO-	196	-0.013	0.005	8.97e-03
TCell	CD8	CD8/25+38-39-73+127+RO+	195	0.007	0.007	0.37
TCell	CD8	CD8/25+39-73+127+RO+	195	0.006	0.007	0.423
TCell	CD8	CD8/25+38-73+127+RO+	195	0.007	0.007	0.34
TCell	CD8	CD8/25+73+127+RO+	195	0.006	0.007	0.398
TCell	CD4	CD4/25-38+127-PD1-RO-	196	-0.013	0.005	0.011
TCell	CD4	CD4/38+127-PD1-RO-	196	-0.013	0.005	9.83e-03
TCell	CD4	CD4/25-38+39-73-127-DR-RO-	195	-0.013	0.005	8.08e-03
TCell	CD4	CD4/38+39-73-127-DR-RO-	196	-0.013	0.005	9.72e-03
TCell	CD4	CD4/25-38+73-127-DR-RO-	196	-0.013	0.005	0.011
TCell	CD4	CD4/38+73-127-DR-RO-	196	-0.013	0.005	9.9e-03
TCell	CD4	CD4/25-38+39-127-DR-RO-	196	-0.013	0.005	0.011
TCell	CD4	CD4/38+39-127-DR-RO-	196	-0.013	0.005	0.01
TCell	CD4	CD4/25-38+127-DR-RO-	196	-0.013	0.005	0.012
TCell	CD4	CD4/38+127-DR-RO-	196	-0.013	0.005	0.01
TCell	CD4	CD4/25-38+39-73-127-RO-	195	-0.013	0.005	6.61e-03
TCell	CD4	CD4/38+39-73-127-RO-	196	-0.013	0.005	7.78e-03
TCell	CD4	CD4/25-38+73-127-RO-	196	-0.013	0.005	8.54e-03
TCell	CD4	CD4/38+73-127-RO-	196	-0.013	0.005	7.87e-03
TCell	CD4	CD4/25-38+39-127-RO-	196	-0.013	0.005	8.62e-03
TCell	CD4	CD4/38+39-127-RO-	196	-0.013	0.005	8.35e-03
TCell	CD4	CD4/25-38+127-RO-	196	-0.013	0.005	9.36e-03
TCell	CD4	CD4/38+127-RO-	196	-0.013	0.005	8.62e-03
TCell	DPT	DPT/25+38-39-127+DR-PD1-RO-	186	-0.001	0.008	0.938
TCell	DPT	DPT/25+38-39-127+PD1-RO-	186	-0.001	0.008	0.941
TCell	DPT	DPT/25+38-39-127+DR-RO-	186	-0.001	0.008	0.894
TCell	DPT	DPT/25+38-39-127+RO-	186	-0.001	0.008	0.915
TCell	CD4	CD4/25-38+39-73-DR-PD1-	194	-0.003	0.003	0.197
TCell	CD4	CD4/38+39-73-DR-PD1-	194	-0.003	0.003	0.188
TCell	CD4	CD4/25-38+73-DR-PD1-	194	-0.003	0.003	0.207
TCell	CD4	CD4/38+73-DR-PD1-	194	-0.003	0.002	0.199
TCell	CD4	CD4/25-38+39-DR-PD1-	194	-0.003	0.003	0.208
TCell	CD4	CD4/38+39-DR-PD1-	194	-0.003	0.003	0.198
TCell	CD4	CD4/25-38+DR-PD1-	194	-0.003	0.003	0.216
TCell	CD4	CD4/38+DR-PD1-	194	-0.003	0.002	0.209
TCell	CD4	CD4/25-38+39-73-127+DR-PD1-	194	-0.003	0.003	0.214
TCell	CD4	CD4/38+39-73-127+DR-PD1-	194	-0.003	0.003	0.203
TCell	CD4	CD4/25-38+73-127+DR-PD1-	194	-0.003	0.003	0.223
TCell	CD4	CD4/38+73-127+DR-PD1-	194	-0.003	0.003	0.213
TCell	CD4	CD4/25-38-39-127+DR-PD1-	194	0.002	0.002	0.126
TCell	CD4	CD4/38-39-127+DR-PD1-	194	0.002	0.002	0.122
TCell	CD4	CD4/25-38+39-127+DR-PD1-	193	-0.003	0.003	0.26
TCell	CD4	CD4/38+39-127+DR-PD1-	193	-0.003	0.003	0.248
TCell	CD4	CD4/25-38-127+DR-PD1-	194	0.002	0.002	0.116
TCell	CD4	CD4/38-127+DR-PD1-	194	0.002	0.002	0.108
TCell	CD4	CD4/25-38+127+DR-PD1-	193	-0.003	0.003	0.271
TCell	CD4	CD4/38+127+DR-PD1-	193	-0.003	0.003	0.26
TCell	CD4	CD4/25-38+39-73-PD1-	194	-0.003	0.003	0.186
TCell	CD4	CD4/38+39-73-PD1-	194	-0.003	0.003	0.178
TCell	CD4	CD4/25-38+73-PD1-	194	-0.003	0.002	0.194
TCell	CD4	CD4/38+73-PD1-	194	-0.003	0.002	0.188
TCell	CD4	CD4/25-38+39-PD1-	194	-0.003	0.003	0.196
TCell	CD4	CD4/38+39-PD1-	194	-0.003	0.003	0.187
TCell	CD4	CD4/25-38+PD1-	194	-0.003	0.002	0.202
TCell	CD4	CD4/38+PD1-	194	-0.003	0.002	0.197
TCell	CD4	CD4/25-38+39-73-127+PD1-	194	-0.003	0.003	0.207
TCell	CD4	CD4/38+39-73-127+PD1-	194	-0.003	0.003	0.196
TCell	CD4	CD4/25-38+73-127+PD1-	194	-0.003	0.003	0.215
TCell	CD4	CD4/38+73-127+PD1-	194	-0.003	0.003	0.206
TCell	CD4	CD4/25-38-39-127+PD1-	194	0.002	0.002	0.137
TCell	CD4	CD4/38-39-127+PD1-	194	0.002	0.002	0.133
TCell	CD4	CD4/25-38+39-127+PD1-	193	-0.003	0.003	0.25
TCell	CD4	CD4/38+39-127+PD1-	193	-0.003	0.003	0.239
TCell	CD4	CD4/25-38-127+PD1-	194	0.002	0.002	0.125
TCell	CD4	CD4/38-127+PD1-	194	0.002	0.002	0.116
TCell	CD4	CD4/25-38+127+PD1-	193	-0.003	0.003	0.261
TCell	CD4	CD4/38+127+PD1-	193	-0.003	0.002	0.25
TCell	CD4	CD4/25-38+39-73-127-DR-	196	-0.01	0.004	8.06e-03
TCell	CD4	CD4/38+39-73-127-DR-	196	-0.01	0.004	0.01
TCell	CD4	CD4/38+39-127-DR-	195	-0.009	0.004	0.015
TCell	CD4	CD4/25-38+39-73-DR-	194	-0.003	0.002	0.163
TCell	CD4	CD4/38+39-73-DR-	194	-0.004	0.002	0.155
TCell	CD4	CD4/25-38+73-DR-	195	-0.004	0.002	0.129
TCell	CD4	CD4/38+73-DR-	195	-0.004	0.002	0.124
TCell	CD4	CD4/25-38+39-DR-	194	-0.003	0.002	0.171
TCell	CD4	CD4/38+39-DR-	194	-0.003	0.002	0.163
TCell	CD4	CD4/25-38+DR-	195	-0.004	0.002	0.135
TCell	CD4	CD4/38+DR-	195	-0.004	0.002	0.13
TCell	CD4	CD4/25-38+39-73-127+DR-	194	-0.003	0.003	0.188
TCell	CD4	CD4/38+39-73-127+DR-	194	-0.003	0.003	0.178
TCell	CD4	CD4/25-38+73-127+DR-	194	-0.003	0.002	0.195
TCell	CD4	CD4/38+73-127+DR-	194	-0.003	0.002	0.185
TCell	CD4	CD4/25-38+39-127+DR-	193	-0.003	0.002	0.229
TCell	CD4	CD4/38+39-127+DR-	193	-0.003	0.002	0.218
TCell	CD4	CD4/25-38+127+DR-	194	-0.003	0.002	0.207
TCell	CD4	CD4/38+127+DR-	194	-0.003	0.002	0.198
TCell	CD4	CD4/25-38+39-73-127-	195	-0.01	0.004	8.45e-03
TCell	CD4	CD4/38+39-73-127-	195	-0.01	0.004	0.011
TCell	CD4	CD4/25-38+39-127-	195	-0.01	0.004	8.56e-03
TCell	CD4	CD4/38+39-127-	195	-0.01	0.004	0.011
TCell	CD4	CD4/25-38+39-73-	195	-0.004	0.002	0.107
TCell	CD4	CD4/38+39-73-	195	-0.004	0.002	0.102
TCell	CD4	CD4/25-38+73-	195	-0.004	0.002	0.11
TCell	CD4	CD4/38+73-	195	-0.004	0.002	0.106
TCell	CD4	CD4/25-38+39-	194	-0.004	0.002	0.148
TCell	CD4	CD4/38+39-	194	-0.004	0.002	0.141
TCell	CD4	CD4/25-38+	195	-0.004	0.002	0.115
TCell	CD4	CD4/38+	196	-0.003	0.002	0.154
TCell	CD4	CD4/25-38+39-73-127+	194	-0.003	0.003	0.173
TCell	CD4	CD4/38+39-73-127+	194	-0.004	0.003	0.164
TCell	CD4	CD4/25-38+73-127+	194	-0.003	0.002	0.178
TCell	CD4	CD4/38+73-127+	194	-0.003	0.002	0.169
TCell	CD4	CD4/25-38+39-127+	193	-0.003	0.002	0.21
TCell	CD4	CD4/38+39-127+	194	-0.003	0.003	0.175
TCell	CD4	CD4/25-38+127+	194	-0.003	0.002	0.189
TCell	CD4	CD4/38+127+	194	-0.003	0.002	0.181
TCell	CD4	CD4/25-38+39-73-DR+	194	-0.016	0.006	0.012
TCell	CD4	CD4/38+39-73-DR+	194	-0.016	0.006	0.011
TCell	CD4	CD4/25-38+39-DR+	194	-0.016	0.006	8.03e-03
TCell	CD4	CD4/38+39-DR+	194	-0.016	0.006	7.62e-03
TCell	CD4	CD4/38+39-73-PD1+	195	-0.01	0.004	0.028
TCell	CD8	CD8/25+38-39-73-127+DR-PD1-RO+	196	0.011	0.008	0.158
TCell	CD8	CD8/25+38-39-73-127+DR-PD1-RO-	195	0.012	0.009	0.188
TCell	CD4	CD4/25-38+39-73-DR+RO+	194	-0.015	0.007	0.029
TCell	CD4	CD4/38+39-73-DR+RO+	194	-0.015	0.007	0.03
TCell	CD4	CD4/25-38+39-DR+RO+	194	-0.015	0.007	0.024
TCell	CD4	CD4/38+39-DR+RO+	194	-0.015	0.007	0.024
TCell	CD8	CD8/25+38-39-73+127+DR-PD1-RO+	195	0.007	0.007	0.359
TCell	CD8	CD8/25+38-39-73-DR-PD1-RO-	196	0.013	0.008	0.134
TCell	CD8	CD8/25+39-73-DR-PD1-RO-	196	0.011	0.008	0.17
TCell	CD8	CD8/25+38-73-DR-PD1-RO-	196	0.013	0.008	0.119
TCell	CD8	CD8/25+73-DR-PD1-RO-	196	0.012	0.008	0.139
TCell	CD8	CD8/25+38-39-DR-PD1-RO-	194	0.007	0.007	0.274
TCell	CD8	CD8/25+39-DR-PD1-RO-	194	0.007	0.007	0.296
TCell	CD8	CD8/25+38-DR-PD1-RO-	194	0.007	0.007	0.273
TCell	CD8	CD8/25+DR-PD1-RO-	194	0.007	0.007	0.282
TCell	CD8	CD8/25+38-39-73+DR-PD1-RO-	195	0.011	0.007	0.104
TCell	CD8	CD8/25+39-73+DR-PD1-RO-	195	0.011	0.007	0.1
TCell	CD8	CD8/25+39-73-127+DR-PD1-RO-	195	0.01	0.009	0.229
TCell	CD8	CD8/25+38-73-127+DR-PD1-RO-	195	0.012	0.009	0.167
TCell	CD8	CD8/25+73-127+DR-PD1-RO-	195	0.011	0.008	0.191
TCell	CD8	CD8/25+38-39-127+DR-PD1-RO-	194	0.007	0.007	0.341
TCell	CD8	CD8/25+39-127+DR-PD1-RO-	194	0.006	0.007	0.372
TCell	CD8	CD8/25+38-127+DR-PD1-RO-	194	0.007	0.007	0.329
TCell	CD8	CD8/25+127+DR-PD1-RO-	194	0.006	0.007	0.353
TCell	CD8	CD8/25+39-73+127+DR-PD1-RO-	194	0.007	0.007	0.326
TCell	CD8	CD8/25+38-73+127+DR-PD1-RO-	195	0.011	0.007	0.116
TCell	CD8	CD8/25+73+127+DR-PD1-RO-	194	0.01	0.007	0.126
TCell	CD8	CD8/25+38-39-73+127+DR-PD1-RO-	194	0.007	0.007	0.319
TCell	CD8	CD8/25+38-39-73-PD1-RO-	196	0.011	0.008	0.171
TCell	CD8	CD8/25+39-73-PD1-RO-	196	0.01	0.008	0.199
TCell	CD8	CD8/25+38-73-PD1-RO-	196	0.012	0.008	0.146
TCell	CD8	CD8/25+73-PD1-RO-	196	0.011	0.008	0.16
TCell	CD8	CD8/25+38-39-PD1-RO-	194	0.007	0.007	0.314
TCell	CD8	CD8/25+39-PD1-RO-	194	0.006	0.007	0.334
TCell	CD8	CD8/25+38-PD1-RO-	194	0.007	0.007	0.291
TCell	CD8	CD8/25+PD1-RO-	194	0.007	0.007	0.292
TCell	CD8	CD8/25+38-39-73+PD1-RO-	195	0.011	0.007	0.106
TCell	CD8	CD8/25+39-73+PD1-RO-	195	0.011	0.007	0.108
TCell	CD8	CD8/25+38-39-73-127+PD1-RO-	196	0.011	0.009	0.19
TCell	CD8	CD8/25+39-73-127+PD1-RO-	196	0.01	0.009	0.226
TCell	CD8	CD8/25+38-73-127+PD1-RO-	196	0.012	0.009	0.163
TCell	CD8	CD8/25+73-127+PD1-RO-	196	0.011	0.008	0.184
TCell	CD8	CD8/25+38-39-127+PD1-RO-	194	0.006	0.007	0.366
TCell	CD8	CD8/25+39-127+PD1-RO-	194	0.006	0.007	0.393
TCell	CD8	CD8/25+38-127+PD1-RO-	194	0.007	0.007	0.342
TCell	CD8	CD8/25+127+PD1-RO-	194	0.006	0.007	0.357
TCell	CD8	CD8/25+38-39-73+127+PD1-RO-	194	0.007	0.007	0.325
TCell	CD8	CD8/25+39-73+127+PD1-RO-	193	0.006	0.007	0.36
TCell	CD8	CD8/25+38-73+127+PD1-RO-	194	0.011	0.007	0.12
TCell	CD8	CD8/25+73+127+PD1-RO-	194	0.01	0.007	0.126
TCell	CD8	CD8/25+38-39-73-DR-RO-	196	0.011	0.008	0.165
TCell	CD8	CD8/25+39-73-DR-RO-	196	0.01	0.008	0.199
TCell	CD8	CD8/25+38-73-DR-RO-	195	0.007	0.008	0.386
TCell	CD8	CD8/25+73-DR-RO-	196	0.011	0.008	0.166
TCell	CD8	CD8/25+38-39-DR-RO-	194	0.007	0.007	0.298
TCell	CD8	CD8/25+39-DR-RO-	194	0.007	0.007	0.318
TCell	CD8	CD8/25+38-DR-RO-	194	0.007	0.007	0.298
TCell	CD8	CD8/25+DR-RO-	194	0.007	0.007	0.302
TCell	CD8	CD8/25+38-39-73+DR-RO-	195	0.011	0.007	0.114
TCell	CD8	CD8/25+39-73+DR-RO-	195	0.011	0.007	0.11
TCell	CD8	CD8/25+38-39-73-127+DR-RO-	195	0.01	0.009	0.222
TCell	CD8	CD8/25+39-73-127+DR-RO-	195	0.01	0.008	0.259
TCell	CD8	CD8/25+38-73-127+DR-RO-	195	0.011	0.008	0.201
TCell	CD8	CD8/25+73-127+DR-RO-	195	0.01	0.008	0.22
TCell	CD8	CD8/25+38-39-127+DR-RO-	194	0.006	0.007	0.364
TCell	CD8	CD8/25+39-127+DR-RO-	194	0.006	0.007	0.391
TCell	CD8	CD8/25+38-127+DR-RO-	194	0.006	0.007	0.352
TCell	CD8	CD8/25+127+DR-RO-	194	0.006	0.007	0.37
TCell	CD8	CD8/25+38-39-73+127+DR-RO-	194	0.007	0.007	0.336
TCell	CD8	CD8/25+39-73+127+DR-RO-	193	0.006	0.007	0.366
TCell	CD8	CD8/25+38-73+127+DR-RO-	194	0.01	0.007	0.13
TCell	CD8	CD8/25+73+127+DR-RO-	194	0.01	0.007	0.135
TCell	CD8	CD8/25+38-39-73-RO-	196	0.01	0.008	0.2
TCell	CD8	CD8/25+39-73-RO-	196	0.01	0.008	0.225
TCell	CD8	CD8/25+38-73-RO-	195	0.006	0.008	0.432
TCell	CD8	CD8/25+73-RO-	195	0.006	0.008	0.448
TCell	CD8	CD8/25+38-39-RO-	194	0.006	0.007	0.339
TCell	CD8	CD8/25+39-RO-	194	0.006	0.007	0.358
TCell	CD8	CD8/25+38-RO-	194	0.007	0.007	0.315
TCell	CD8	CD8/25+RO-	194	0.007	0.006	0.311
TCell	CD8	CD8/25+38-39-73+RO-	195	0.011	0.007	0.117
TCell	CD8	CD8/25+39-73+RO-	195	0.01	0.007	0.118
TCell	CD8	CD8/25+38-39-73-127+RO-	196	0.011	0.008	0.214
TCell	CD8	CD8/25+39-73-127+RO-	196	0.01	0.008	0.248
TCell	CD8	CD8/25+38-73-127+RO-	195	0.006	0.008	0.459
TCell	CD8	CD8/25+73-127+RO-	196	0.01	0.008	0.206
TCell	CD8	CD8/25+38-39-127+RO-	194	0.006	0.007	0.388
TCell	CD8	CD8/25+39-127+RO-	194	0.006	0.007	0.413
TCell	CD8	CD8/25+38-127+RO-	194	0.006	0.007	0.363
TCell	CD8	CD8/25+127+RO-	194	0.006	0.007	0.373
TCell	CD8	CD8/25+38-39-73+127+RO-	194	0.007	0.007	0.345
TCell	CD8	CD8/25+39-73+127+RO-	193	0.006	0.007	0.38
TCell	CD8	CD8/25+38-73+127+RO-	194	0.01	0.007	0.128
TCell	CD8	CD8/25+73+127+RO-	194	0.01	0.007	0.132
TCell	CD8	CD8/25+38-39-73-DR-PD1-	196	0.011	0.007	0.151
TCell	CD8	CD8/25+39-73-DR-PD1-	196	0.011	0.007	0.151
TCell	CD8	CD8/25+38-73-DR-PD1-	196	0.011	0.007	0.143
TCell	CD8	CD8/25+73-DR-PD1-	196	0.011	0.007	0.137
TCell	CD8	CD8/25+38-39-DR-PD1-	195	0.006	0.006	0.373
TCell	CD8	CD8/25+39-DR-PD1-	195	0.006	0.006	0.389
TCell	CD8	CD8/25+38-DR-PD1-	195	0.006	0.006	0.35
TCell	CD8	CD8/25+DR-PD1-	195	0.006	0.006	0.361
TCell	CD8	CD8/25+38-39-73+DR-PD1-	195	0.005	0.006	0.439
TCell	CD8	CD8/25+39-73+DR-PD1-	195	0.005	0.006	0.471
TCell	CD8	CD8/25+38-73+DR-PD1-	195	0.006	0.006	0.362
TCell	CD8	CD8/25+73+DR-PD1-	195	0.005	0.006	0.385
TCell	CD8	CD8/25+38-39-73-127+DR-PD1-	196	0.011	0.008	0.163
TCell	CD8	CD8/25+39-73-127+DR-PD1-	196	0.01	0.007	0.169
TCell	CD8	CD8/25+38-73-127+DR-PD1-	196	0.01	0.007	0.162
TCell	CD8	CD8/25+73-127+DR-PD1-	196	0.01	0.007	0.171
TCell	CD8	CD8/25+38-39-127+DR-PD1-	195	0.006	0.007	0.382
TCell	CD8	CD8/25+39-127+DR-PD1-	195	0.005	0.007	0.406
TCell	CD8	CD8/25+38-127+DR-PD1-	195	0.006	0.007	0.377
TCell	CD8	CD8/25+127+DR-PD1-	195	0.005	0.006	0.407
TCell	CD8	CD8/25+38-39-73+127+DR-PD1-	195	0.005	0.007	0.447
TCell	CD8	CD8/25+39-73+127+DR-PD1-	195	0.004	0.006	0.492
TCell	CD8	CD8/25+38-73+127+DR-PD1-	195	0.005	0.006	0.398
TCell	CD8	CD8/25+73+127+DR-PD1-	195	0.005	0.006	0.448
TCell	CD8	CD8/25+38-39-73-PD1-	196	0.01	0.007	0.167
TCell	CD8	CD8/25+39-73-PD1-	196	0.01	0.007	0.164
TCell	CD8	CD8/25+38-73-PD1-	196	0.01	0.007	0.15
TCell	CD8	CD8/25+73-PD1-	196	0.01	0.007	0.142
TCell	CD8	CD8/25+38-39-PD1-	195	0.005	0.006	0.418
TCell	CD8	CD8/25+39-PD1-	195	0.005	0.006	0.434
TCell	CD8	CD8/25+38-PD1-	195	0.005	0.006	0.381
TCell	CD8	CD8/25+PD1-	195	0.005	0.006	0.391
TCell	CD8	CD8/25+38-39-73+PD1-	195	0.004	0.006	0.487
TCell	CD8	CD8/25+39-73+PD1-	195	0.004	0.006	0.526
TCell	CD8	CD8/25+38-73+PD1-	195	0.005	0.006	0.402
TCell	CD8	CD8/25+73+PD1-	195	0.005	0.006	0.425
TCell	CD8	CD8/25+38-39-73-127+PD1-	196	0.01	0.008	0.17
TCell	CD8	CD8/25+39-73-127+PD1-	196	0.01	0.007	0.177
TCell	CD8	CD8/25+38-73-127+PD1-	196	0.01	0.007	0.166
TCell	CD8	CD8/25+73-127+PD1-	196	0.01	0.007	0.176
TCell	CD8	CD8/25+38-39-127+PD1-	195	0.005	0.007	0.413
TCell	CD8	CD8/25+39-127+PD1-	195	0.005	0.006	0.44
TCell	CD8	CD8/25+38-127+PD1-	195	0.005	0.007	0.402
TCell	CD8	CD8/25+127+PD1-	195	0.005	0.006	0.437
TCell	CD8	CD8/25+38-39-73+127+PD1-	195	0.005	0.007	0.49
TCell	CD8	CD8/25+39-73+127+PD1-	195	0.004	0.006	0.539
TCell	CD8	CD8/25+38-73+127+PD1-	195	0.005	0.006	0.442
TCell	CD8	CD8/25+73+127+PD1-	195	0.004	0.006	0.492
TCell	CD8/Memory	CD8/Memory/161-PD1-R4+R6-R10-XR3-XR5-	194	0.01	0.006	0.092
TCell	CD4/Memory	CD4/Memory/161+PD1+R4+R6-R10-XR3-XR5-	195	-0.016	0.006	0.01
TCell	CD8/Memory	CD8/Memory/161+PD1-R4-R6-R10-XR3-XR5-	194	-0.008	0.008	0.351
TCell	CD4/Memory	CD4/Memory/161+R4-R6-R10-XR3-	193	-0.012	0.007	0.085
TCell	CD4/Memory	CD4/Memory/161+PD1+R4-R6-R10-XR3-	194	-0.022	0.009	0.016
TCell	CD4/Memory	CD4/Memory/161+PD1-R6-R10-XR3-	193	-0.009	0.005	0.096
TCell	CD4/Memory	CD4/Memory/161+R6-R10-XR3-	193	-0.011	0.005	0.042
TCell	CD4/Memory	CD4/Memory/161+PD1+R6-R10-XR3-	192	-0.019	0.006	2.51e-03
TCell	CD4/Memory	CD4/Memory/161+PD1-R4+R6-R10-XR3-	194	-0.007	0.006	0.192
TCell	CD4/Memory	CD4/Memory/161+R4+R6-R10-XR3-	194	-0.009	0.005	0.082
TCell	CD4/Memory	CD4/Memory/161+PD1+R4+R6-R10-XR3-	194	-0.018	0.006	1.93e-03
TCell	CD4/Memory	CD4/Memory/161+PD1+R10-XR3-	193	-0.016	0.006	6.48e-03
TCell	CD4/Memory	CD4/Memory/161+R4-R6-XR3-	193	-0.012	0.007	0.082
TCell	CD4/Memory	CD4/Memory/161+PD1+R4-R6-XR3-	194	-0.023	0.009	0.015
TCell	CD4/Memory	CD4/Memory/161+PD1-R6-XR3-	193	-0.009	0.005	0.096
TCell	CD4/Memory	CD4/Memory/161+R6-XR3-	193	-0.011	0.005	0.042
TCell	CD4/Memory	CD4/Memory/161+PD1+R6-XR3-	192	-0.019	0.006	2.37e-03
TCell	CD4/Memory	CD4/Memory/161+PD1-R4+R6-XR3-	194	-0.007	0.006	0.193
TCell	CD4/Memory	CD4/Memory/161+R4+R6-XR3-	194	-0.009	0.005	0.081
TCell	CD4/Memory	CD4/Memory/161+PD1+R4+R6-XR3-	194	-0.018	0.006	1.82e-03
TCell	CD4/Memory	CD4/Memory/161+PD1+XR3-	193	-0.016	0.006	6.11e-03
TCell	CD4/Memory	CD4/Memory/161+PD1-R4+R6-R10-	194	-0.008	0.005	0.133
TCell	CD4/Memory	CD4/Memory/161+PD1-R4+R6-	194	-0.008	0.005	0.122
TCell	CD8/Memory	CD8/Memory/161-PD1-R4+R6-R10-XR3+XR5-	195	0.008	0.009	0.408
TCell	CD8/Memory	CD8/Memory/PD1-R4-R6-R10-XR3-XR5-	192	-0.005	0.003	0.091
TCell	CD8/Memory	CD8/Memory/161-R4-R6-R10-XR3-XR5-	194	-0.003	0.003	0.264
TCell	CD8/Memory	CD8/Memory/R4-R6-R10-XR3-XR5-	194	-0.004	0.003	0.149
TCell	CD8/Memory	CD8/Memory/161+R4-R6-R10-XR3-XR5-	194	-0.007	0.008	0.392
TCell	CD8/Memory	CD8/Memory/161+PD1-R6-R10-XR3-XR5-	194	-0.008	0.008	0.313
TCell	CD8/Memory	CD8/Memory/161+R6-R10-XR3-XR5-	193	-0.009	0.008	0.261
TCell	CD8/Memory	CD8/Memory/161-R4+R6-R10-XR3-XR5-	194	0.007	0.005	0.141
TCell	CD8/Memory	CD8/Memory/R4+R6-R10-XR3-XR5-	194	0.007	0.005	0.155
TCell	CD8/Memory	CD8/Memory/PD1-R4-R10-XR3-XR5-	192	-0.004	0.003	0.178
TCell	CD8/Memory	CD8/Memory/161+PD1-R4-R10-XR3-XR5-	193	-0.002	0.008	0.786
TCell	CD8/Memory	CD8/Memory/161-R4-R10-XR3-XR5-	194	-0.003	0.003	0.268
TCell	CD8/Memory	CD8/Memory/161+PD1-R10-XR3-XR5-	193	-0.003	0.008	0.723
TCell	CD8/Memory	CD8/Memory/161-PD1-R4+R10-XR3-XR5-	194	0.01	0.006	0.088
TCell	CD8/Memory	CD8/Memory/161-R4+R10-XR3-XR5-	194	0.007	0.005	0.135
TCell	CD8/Memory	CD8/Memory/R4+R10-XR3-XR5-	194	0.007	0.005	0.138
TCell	CD8/Memory	CD8/Memory/PD1-R4-R6-XR3-XR5-	192	-0.005	0.003	0.089
TCell	CD8/Memory	CD8/Memory/161+PD1-R4-R6-XR3-XR5-	194	-0.008	0.008	0.35
TCell	CD8/Memory	CD8/Memory/161-R4-R6-XR3-XR5-	194	-0.004	0.003	0.262
TCell	CD8/Memory	CD8/Memory/R4-R6-XR3-XR5-	194	-0.004	0.003	0.147
TCell	CD8/Memory	CD8/Memory/161+R4-R6-XR3-XR5-	194	-0.007	0.008	0.39
TCell	CD8/Memory	CD8/Memory/161+PD1-R6-XR3-XR5-	194	-0.008	0.008	0.312
TCell	CD8/Memory	CD8/Memory/161+R6-XR3-XR5-	193	-0.009	0.008	0.261
TCell	CD8/Memory	CD8/Memory/161-PD1-R4+R6-XR3-XR5-	194	0.009	0.006	0.096
TCell	CD8/Memory	CD8/Memory/161-R4+R6-XR3-XR5-	194	0.007	0.005	0.149
TCell	CD8/Memory	CD8/Memory/R4+R6-XR3-XR5-	194	0.007	0.005	0.162
TCell	CD8/Memory	CD8/Memory/PD1-R4-XR3-XR5-	192	-0.004	0.003	0.175
TCell	CD8/Memory	CD8/Memory/161+PD1-R4-XR3-XR5-	193	-0.002	0.008	0.782
TCell	CD8/Memory	CD8/Memory/161-R4-XR3-XR5-	194	-0.003	0.003	0.266
TCell	CD8/Memory	CD8/Memory/161+PD1-XR3-XR5-	193	-0.003	0.008	0.718
TCell	CD8/Memory	CD8/Memory/161-PD1-R4+XR3-XR5-	194	0.009	0.006	0.091
TCell	CD8/Memory	CD8/Memory/161-R4+XR3-XR5-	194	0.007	0.005	0.142
TCell	CD8/Memory	CD8/Memory/R4+XR3-XR5-	194	0.007	0.005	0.144
TCell	CD4/Memory	CD4/Memory/161+PD1-R4+R6-R10-XR3-XR5-	194	-0.006	0.006	0.259
TCell	CD8/Memory	CD8/Memory/R4-R6-R10-XR5-	192	-0.001	0.001	0.38
TCell	CD8/Memory	CD8/Memory/161-PD1-R4+R6-R10-XR5-	194	0.01	0.005	0.066
TCell	CD8/Memory	CD8/Memory/PD1-R4+R6-R10-XR5-	195	0.009	0.005	0.076
TCell	CD8/Memory	CD8/Memory/161-R4+R6-R10-XR5-	194	0.007	0.005	0.124
TCell	CD8/Memory	CD8/Memory/R4+R6-R10-XR5-	194	0.006	0.005	0.169
TCell	CD8/Memory	CD8/Memory/R4-R10-XR5-	191	0	0.001	0.635
TCell	CD8/Memory	CD8/Memory/161-PD1-R4+R10-XR5-	194	0.01	0.005	0.067
TCell	CD8/Memory	CD8/Memory/PD1-R4+R10-XR5-	195	0.009	0.005	0.078
TCell	CD8/Memory	CD8/Memory/161-R4+R10-XR5-	194	0.007	0.005	0.124
TCell	CD8/Memory	CD8/Memory/R4+R10-XR5-	194	0.006	0.005	0.17
TCell	CD8/Memory	CD8/Memory/R4-R6-XR5-	192	-0.001	0.001	0.352
TCell	CD8/Memory	CD8/Memory/161-PD1-R4+R6-XR5-	194	0.01	0.005	0.069
TCell	CD8/Memory	CD8/Memory/PD1-R4+R6-XR5-	195	0.009	0.005	0.081
TCell	CD8/Memory	CD8/Memory/161-R4+R6-XR5-	194	0.007	0.005	0.133
TCell	CD8/Memory	CD8/Memory/R4+R6-XR5-	194	0.006	0.005	0.18
TCell	CD8/Memory	CD8/Memory/R4-XR5-	190	0	0.001	0.608
TCell	CD8/Memory	CD8/Memory/161-PD1-R4+XR5-	194	0.01	0.005	0.07
TCell	CD8/Memory	CD8/Memory/PD1-R4+XR5-	195	0.009	0.005	0.084
TCell	CD8/Memory	CD8/Memory/161-R4+XR5-	194	0.007	0.005	0.132
TCell	CD8/Memory	CD8/Memory/R4+XR5-	194	0.006	0.005	0.18
TCell	CD8/Memory	CD8/Memory/PD1-R4+R6-R10-XR3+XR5-	195	0.005	0.008	0.575
TCell	CD8/Memory	CD8/Memory/161-R4+R6-R10-XR3+XR5-	195	0.005	0.009	0.554
TCell	CD8/Memory	CD8/Memory/R4+R6-R10-XR3+XR5-	194	0.003	0.008	0.765
TCell	CD8/Memory	CD8/Memory/161-PD1-R4+R10-XR3+XR5-	195	0.007	0.009	0.441
TCell	CD8/Memory	CD8/Memory/PD1-R4+R10-XR3+XR5-	195	0.004	0.008	0.622
TCell	CD8/Memory	CD8/Memory/161-R4+R10-XR3+XR5-	194	0.009	0.009	0.338
TCell	CD8/Memory	CD8/Memory/R4+R10-XR3+XR5-	195	0.003	0.008	0.758
TCell	CD8/Memory	CD8/Memory/161-PD1-R4+R6-XR3+XR5-	195	0.008	0.009	0.385
TCell	CD8/Memory	CD8/Memory/PD1-R4+R6-XR3+XR5-	195	0.005	0.008	0.577
TCell	CD8/Memory	CD8/Memory/161-R4+R6-XR3+XR5-	194	0.005	0.009	0.588
TCell	CD8/Memory	CD8/Memory/R4+R6-XR3+XR5-	194	0.002	0.008	0.763
TCell	CD8/Memory	CD8/Memory/161-PD1-R4+XR3+XR5-	195	0.007	0.009	0.413
TCell	CD8/Memory	CD8/Memory/PD1-R4+XR3+XR5-	195	0.004	0.008	0.635
TCell	CD8/Memory	CD8/Memory/161-R4+XR3+XR5-	195	0.005	0.009	0.565
TCell	CD8/Memory	CD8/Memory/R4+XR3+XR5-	195	0.003	0.008	0.751
TCell	CD4/Memory	CD4/Memory/161+R6-R10-XR3-XR5-	193	-0.012	0.006	0.047
TCell	CD4/Memory	CD4/Memory/161+PD1+R6-R10-XR3-XR5-	193	-0.02	0.007	4.96e-03
TCell	CD8/Memory	CD8/Memory/PD1-R4-R6-R10-XR3-	192	-0.005	0.003	0.091
TCell	CD8/Memory	CD8/Memory/161+PD1-R4-R6-R10-XR3-	194	-0.008	0.008	0.352
TCell	CD8/Memory	CD8/Memory/161-R4-R6-R10-XR3-	194	-0.003	0.003	0.265
TCell	CD4/Memory	CD4/Memory/161+R4+R6-R10-XR3-XR5-	195	-0.008	0.006	0.154
TCell	CD8/Memory	CD8/Memory/R4-R6-R10-XR3-	194	-0.004	0.003	0.149
TCell	CD8/Memory	CD8/Memory/161+R4-R6-R10-XR3-	194	-0.007	0.008	0.392
TCell	CD8/Memory	CD8/Memory/161+PD1-R6-R10-XR3-	194	-0.008	0.008	0.313
TCell	CD8/Memory	CD8/Memory/161+R6-R10-XR3-	194	-0.007	0.008	0.349
TCell	CD8/Memory	CD8/Memory/161-PD1-R4+R6-R10-XR3-	194	0.009	0.006	0.093
TCell	CD8/Memory	CD8/Memory/161-R4+R6-R10-XR3-	194	0.007	0.005	0.141
TCell	CD8/Memory	CD8/Memory/R4+R6-R10-XR3-	194	0.007	0.005	0.156
TCell	CD8/Memory	CD8/Memory/PD1-R4-R10-XR3-	192	-0.004	0.003	0.179
TCell	CD8/Memory	CD8/Memory/161+PD1-R4-R10-XR3-	193	-0.002	0.008	0.786
TCell	CD8/Memory	CD8/Memory/161-R4-R10-XR3-	194	-0.003	0.003	0.269
TCell	CD8/Memory	CD8/Memory/161+PD1-R10-XR3-	193	-0.003	0.008	0.722
TCell	CD8/Memory	CD8/Memory/161-PD1-R4+R10-XR3-	194	0.01	0.006	0.089
TCell	CD8/Memory	CD8/Memory/161-R4+R10-XR3-	194	0.007	0.005	0.135
TCell	CD8/Memory	CD8/Memory/R4+R10-XR3-	194	0.007	0.005	0.139
TCell	CD8/Memory	CD8/Memory/PD1-R4-R6-XR3-	192	-0.005	0.003	0.089
TCell	CD8/Memory	CD8/Memory/161+PD1-R4-R6-XR3-	194	-0.008	0.008	0.35
TCell	CD8/Memory	CD8/Memory/161-R4-R6-XR3-	194	-0.004	0.003	0.262
TCell	CD8/Memory	CD8/Memory/R4-R6-XR3-	194	-0.004	0.003	0.147
TCell	CD8/Memory	CD8/Memory/161+R4-R6-XR3-	194	-0.007	0.008	0.391
TCell	CD8/Memory	CD8/Memory/161+PD1-R6-XR3-	194	-0.008	0.008	0.313
TCell	CD8/Memory	CD8/Memory/161+R6-XR3-	194	-0.007	0.008	0.35
TCell	CD8/Memory	CD8/Memory/161-PD1-R4+R6-XR3-	194	0.009	0.006	0.096
TCell	CD8/Memory	CD8/Memory/161-R4+R6-XR3-	194	0.007	0.005	0.15
TCell	CD8/Memory	CD8/Memory/R4+R6-XR3-	194	0.007	0.005	0.163
TCell	CD8/Memory	CD8/Memory/PD1-R4-XR3-	192	-0.004	0.003	0.176
TCell	CD8/Memory	CD8/Memory/161+PD1-R4-XR3-	193	-0.002	0.008	0.783
TCell	CD8/Memory	CD8/Memory/161-R4-XR3-	194	-0.003	0.003	0.266
TCell	CD8/Memory	CD8/Memory/161+PD1-XR3-	193	-0.003	0.008	0.719
TCell	CD8/Memory	CD8/Memory/161-PD1-R4+XR3-	194	0.009	0.006	0.091
TCell	CD8/Memory	CD8/Memory/161-R4+XR3-	194	0.007	0.005	0.142
TCell	CD8/Memory	CD8/Memory/R4+XR3-	194	0.007	0.005	0.145
TCell	CD4/Memory	CD4/Memory/161+PD1+R10-XR3-XR5-	194	-0.016	0.006	0.013
TCell	CD8/Memory	CD8/Memory/R4-R6-R10-	192	-0.001	0.001	0.384
TCell	CD8/Memory	CD8/Memory/161-PD1-R4+R6-R10-	194	0.01	0.005	0.067
TCell	CD8/Memory	CD8/Memory/PD1-R4+R6-R10-	195	0.009	0.005	0.079
TCell	CD8/Memory	CD8/Memory/161-R4+R6-R10-	194	0.007	0.005	0.125
TCell	CD8/Memory	CD8/Memory/R4+R6-R10-	194	0.006	0.005	0.17
TCell	CD8/Memory	CD8/Memory/R4-R10-	190	0	0.001	0.656
TCell	CD8/Memory	CD8/Memory/161-PD1-R4+R10-	194	0.01	0.005	0.068
TCell	CD8/Memory	CD8/Memory/PD1-R4+R10-	195	0.009	0.005	0.082
TCell	CD8/Memory	CD8/Memory/161-R4+R10-	194	0.007	0.005	0.125
TCell	CD8/Memory	CD8/Memory/R4+R10-	194	0.006	0.005	0.172
TCell	CD8/Memory	CD8/Memory/R4-R6-	191	-0.001	0.001	0.26
TCell	CD8/Memory	CD8/Memory/161-PD1-R4+R6-	194	0.01	0.005	0.071
TCell	CD8/Memory	CD8/Memory/PD1-R4+R6-	195	0.009	0.005	0.084
TCell	CD8/Memory	CD8/Memory/161-R4+R6-	194	0.007	0.005	0.134
TCell	CD8/Memory	CD8/Memory/R4+R6-	194	0.006	0.005	0.181
TCell	CD8/Memory	CD8/Memory/R4-	191	0	0.001	0.588
TCell	CD8/Memory	CD8/Memory/161-PD1-R4+	194	0.01	0.005	0.072
TCell	CD8/Memory	CD8/Memory/PD1-R4+	195	0.009	0.005	0.087
TCell	CD8/Memory	CD8/Memory/161-R4+	194	0.007	0.005	0.133
TCell	CD8/Memory	CD8/Memory/R4+	194	0.006	0.005	0.183
TCell	CD8/Memory	CD8/Memory/161-PD1-R4+R6-R10-XR3+	195	0.007	0.009	0.441
TCell	CD8/Memory	CD8/Memory/PD1-R4+R6-R10-XR3+	195	0.004	0.008	0.607
TCell	CD8/Memory	CD8/Memory/161-R4+R6-R10-XR3+	194	0.009	0.009	0.315
TCell	CD8/Memory	CD8/Memory/R4+R6-R10-XR3+	194	0.003	0.008	0.762
TCell	CD8/Memory	CD8/Memory/161-PD1-R4+R10-XR3+	195	0.007	0.009	0.468
TCell	CD8/Memory	CD8/Memory/PD1-R4+R10-XR3+	195	0.004	0.008	0.65
TCell	CD8/Memory	CD8/Memory/161-R4+R10-XR3+	194	0.009	0.009	0.334
TCell	CD8/Memory	CD8/Memory/R4+R10-XR3+	195	0.003	0.008	0.749
TCell	CD8/Memory	CD8/Memory/161-PD1-R4+R6-XR3+	195	0.007	0.009	0.416
TCell	CD8/Memory	CD8/Memory/PD1-R4+R6-XR3+	195	0.004	0.008	0.608
TCell	CD8/Memory	CD8/Memory/161-R4+R6-XR3+	193	0.004	0.009	0.623
TCell	CD8/Memory	CD8/Memory/R4+R6-XR3+	194	0.003	0.008	0.76
TCell	CD8/Memory	CD8/Memory/161-PD1-R4+XR3+	195	0.007	0.009	0.442
TCell	CD8/Memory	CD8/Memory/PD1-R4+XR3+	195	0.003	0.008	0.66
TCell	CD8/Memory	CD8/Memory/161-R4+XR3+	195	0.005	0.009	0.566
TCell	CD8/Memory	CD8/Memory/R4+XR3+	195	0.003	0.008	0.74
TCell	CD4/Memory	CD4/Memory/161+R6-XR3-XR5-	193	-0.012	0.006	0.046
TCell	CD4/Memory	CD4/Memory/161+PD1+R6-XR3-XR5-	194	-0.019	0.007	6.29e-03
TCell	CD4/Memory	CD4/Memory/161+PD1-R4+R6-XR3-XR5-	194	-0.007	0.006	0.255
TCell	CD4/Memory	CD4/Memory/161+R4+R6-XR3-XR5-	195	-0.008	0.006	0.152
TCell	CD4/Memory	CD4/Memory/161+PD1+R4+R6-XR3-XR5-	195	-0.016	0.006	9.22e-03
TCell	CD4/Memory	CD4/Memory/161+PD1+XR3-XR5-	194	-0.016	0.006	0.012
TCell	CD4/Memory	CD4/Memory/161+PD1-R4+R6-R10-XR5-	194	-0.008	0.005	0.159
TCell	CD4/Memory	CD4/Memory/161+R4+R6-R10-XR5-	194	-0.009	0.005	0.089
TCell	CD4/Memory	CD4/Memory/161+PD1-R4+R6-XR5-	194	-0.008	0.005	0.145
TCell	CD4/Memory	CD4/Memory/161+R4+R6-XR5-	194	-0.009	0.005	0.081
TCell	CD8	CD8/RA-R5-	195	0	0.004	0.959
TCell	CD8	CD8/27+RA-R5-	196	0.002	0.005	0.648
TCell	CD8	CD8/27-28+RA-R5-	196	-0.002	0.006	0.774
TCell	CD8	CD8/28+RA-R5-	197	0.003	0.005	0.566
TCell	CD8	CD8/27+28+RA-R5-	197	0.004	0.005	0.489
TCell	CD8	CD8/27-RA-R5-R7+	196	-0.002	0.007	0.751
TCell	CD8	CD8/RA-R5-R7+	196	0.008	0.005	0.149
TCell	CD8	CD8/27+RA-R5-R7+	196	0.008	0.006	0.194
TCell	CD8	CD8/28+RA-R5-R7+	197	0.009	0.006	0.121
TCell	CD8	CD8/RA-R7+	195	0.003	0.004	0.53
TCell	CD8	CD8/27+RA-R7+	196	0.005	0.005	0.347
TCell	CD8	CD8/28+RA-R7+	195	0.005	0.005	0.352
TCell	CD8	CD8/27+28+RA-R7+	196	0.006	0.005	0.305
TCell	CD8	CD8/27-28+RA-R5-R7+	195	0.006	0.008	0.477
TCell	CD8	CD8/27+28+RA-R5-R7+	196	0.008	0.006	0.171
TCell	Vg9+/Vd2Low	Vg9+/Vd2Low/8-27-RA+R7-	196	-0.008	0.006	0.161
TCell	Vg9+/Vd2Low	Vg9+/Vd2Low/8-RA+R7-	196	-0.007	0.005	0.193
TCell	Vg9+/Vd2Low	Vg9+/Vd2Low/8-27-RA+	196	-0.007	0.006	0.194
Monocyte	Monocytes	Monocytes/16-141-DR+	195	-0.001	0.007	0.851
Monocyte	Monocytes	Monocytes/16-64+141-DR+	194	-0.002	0.008	0.759
Monocyte	Monocytes	Monocytes/16-DR+	195	-0.001	0.007	0.848
Monocyte	Monocytes	Monocytes/16-64+DR+	194	-0.002	0.008	0.753
TCell	CD8	CD8/27-31-57-95+127+244-	196	0.004	0.007	0.571
TCell	CD8	CD8/31-57-95+127+244-	197	0.007	0.006	0.214
TCell	CD8	CD8/27+31-57-95+127+244-	197	0.008	0.006	0.168
TCell	CD8	CD8/27-28+31-57-95+127+244-	196	0.006	0.007	0.382
TCell	CD8	CD8/28+31-57-95+127+244-	197	0.008	0.006	0.175
TCell	CD8	CD8/27+28+31-57-95+127+244-	197	0.009	0.006	0.158
TCell	CD8	CD8/27-57-95+127+244-	196	0.002	0.007	0.729
TCell	CD8	CD8/57-95+127+244-	196	0.004	0.005	0.432
TCell	CD8	CD8/27-28+57-95+127+244-	196	0.004	0.007	0.508
TCell	CD8	CD8/27-31-95+127+244-	196	0.003	0.007	0.61
TCell	CD8	CD8/31-95+127+244-	197	0.007	0.006	0.221
TCell	CD8	CD8/27+31-95+127+244-	197	0.008	0.006	0.169
TCell	CD8	CD8/27-28+31-95+127+244-	196	0.006	0.007	0.387
TCell	CD8	CD8/28+31-95+127+244-	197	0.008	0.006	0.176
TCell	CD8	CD8/27+28+31-95+127+244-	197	0.009	0.006	0.159
TCell	CD8	CD8/27-95+127+244-	196	0.002	0.007	0.77
TCell	CD8	CD8/27-28+95+127+244-	196	0.004	0.007	0.517
BCell	B cells/A	B cells/A/10-24-27-38+95-	194	0.001	0.006	0.85
BCell	B cells/A	B cells/A/24-27-38+95-	194	0.001	0.006	0.905
BCell	B cells/A	B cells/A/5+27-38+95-	188	0.001	0.009	0.923
BCell	B cells/A	B cells/A/10-21+27-38+95-	195	-0.001	0.006	0.836
BCell	B cells/A	B cells/A/10-24-38+95-	196	-0.002	0.005	0.667
BCell	B cells/A	B cells/A/24-38+95-	197	-0.002	0.005	0.627
BCell	B cells/A	B cells/A/10-38+95-	197	-0.003	0.004	0.456
BCell	B cells/A	B cells/A/38+95-	197	-0.002	0.003	0.591
BCell	B cells/A	B cells/A/10-21+38+95-	196	-0.001	0.004	0.895
BCell	B cells/A	B cells/A/21+38+95-	196	0	0.004	0.96
BCell	B cells/A	B cells/A/5-10-24-38-	195	0.002	0.004	0.595
BCell	B cells/A	B cells/A/10-24-38-	196	0.001	0.003	0.759
BCell	B cells/A	B cells/A/5-24-38-	195	0.002	0.004	0.529
BCell	B cells/A	B cells/A/24-38-	196	0.001	0.003	0.71
BCell	B cells/A	B cells/A/5-10-21+24-38-	194	0.003	0.004	0.449
BCell	B cells/A	B cells/A/5-21+24-38-	194	0.002	0.004	0.556
BCell	B cells/A	B cells/A/21+24-38-	195	0.001	0.003	0.79
BCell	B cells/A	B cells/A/10-38-	193	0.002	0.002	0.422
BCell	B cells/A	B cells/A/5-38-	194	0.001	0.003	0.637
BCell	B cells/A	B cells/A/38-	193	0.002	0.002	0.442
BCell	B cells/A	B cells/A/5-10-21+38-	195	0.004	0.003	0.233
BCell	B cells/A	B cells/A/10-21+38-	194	0.001	0.003	0.59
BCell	B cells/A	B cells/A/5-21+38-	194	0.003	0.003	0.318
BCell	B cells/A	B cells/A/21+38-	194	0.001	0.003	0.599
BCell	B cells/A	B cells/A/5-10-24-27+38-	192	0.009	0.004	0.033
BCell	B cells/A	B cells/A/10-24-27+38-	193	0.006	0.004	0.15
BCell	B cells/A	B cells/A/5-24-27+38-	194	0.007	0.005	0.119
BCell	B cells/A	B cells/A/24-27+38-	194	0.005	0.004	0.242
BCell	B cells/A	B cells/A/5-10-21+24-27+38-	191	0.007	0.005	0.176
BCell	B cells/A	B cells/A/10-21+24-27+38-	191	0.006	0.005	0.237
BCell	B cells/A	B cells/A/5-21+24-27+38-	193	0.006	0.005	0.241
BCell	B cells/A	B cells/A/21+24-27+38-	193	0.005	0.005	0.344
BCell	B cells/A	B cells/A/5-10-27+38-	191	0.005	0.003	0.093
BCell	B cells/A	B cells/A/10-27+38-	193	0.006	0.003	0.067
BCell	B cells/A	B cells/A/27+38-	192	0.005	0.003	0.106
BCell	B cells/A	B cells/A/5-10-21+27+38-	192	0.007	0.004	0.086
BCell	B cells/A	B cells/A/10-21+27+38-	192	0.006	0.004	0.11
BCell	B cells/A	B cells/A/5-21+27+38-	192	0.006	0.004	0.107
BCell	B cells/A	B cells/A/21+27+38-	192	0.006	0.004	0.133
BCell	B cells/A	B cells/A/5+10-21+27-	191	0	0.008	0.973
BCell	B cells/A	B cells/A/5-10-21+24-	193	0.002	0.003	0.56
BCell	B cells/A	B cells/A/5-21+24-	193	0.002	0.003	0.498
BCell	B cells/A	B cells/A/10-21+24-27+	193	0.003	0.004	0.478
BCell	B cells/A	B cells/A/10-24-27-38+	195	-0.004	0.005	0.369
BCell	B cells/A	B cells/A/24-27-38+	195	-0.004	0.005	0.392
BCell	B cells/A	B cells/A/10-21+24-27-38+	195	-0.002	0.005	0.731
BCell	B cells/A	B cells/A/10-27-38+	195	-0.006	0.004	0.169
BCell	B cells/A	B cells/A/5+10-27-38+	189	0.002	0.009	0.831
BCell	B cells/A	B cells/A/27-38+	195	-0.005	0.004	0.175
BCell	B cells/A	B cells/A/5+27-38+	191	0.001	0.009	0.878
BCell	B cells/A	B cells/A/10-21+27-38+	195	-0.003	0.004	0.447
BCell	B cells/A	B cells/A/5+10-21+27-38+	188	0.002	0.009	0.787
BCell	B cells/A	B cells/A/21+27-38+	195	-0.003	0.004	0.422
BCell	B cells/A	B cells/A/5+21+27-38+	190	0.002	0.009	0.784
BCell	B cells/A	B cells/A/10-24-38+	197	-0.003	0.003	0.356
BCell	B cells/A	B cells/A/24-38+	197	-0.003	0.003	0.373
BCell	B cells/A	B cells/A/10-21+24-38+	197	-0.001	0.004	0.779
BCell	B cells/A	B cells/A/21+24-38+	197	-0.001	0.003	0.771
BCell	B cells/A	B cells/A/5-10-38+	194	-0.005	0.003	0.071
BCell	B cells/A	B cells/A/10-38+	196	-0.004	0.002	0.097
BCell	B cells/A	B cells/A/5-38+	193	-0.006	0.003	0.026
BCell	B cells/A	B cells/A/5-10-21-24-38-95+	188	0.011	0.006	0.061
BCell	B cells/A	B cells/A/10-21-24-38-95+	189	0.012	0.005	0.025
BCell	B cells/A	B cells/A/5-21-24-38-95+	189	0.012	0.006	0.038
BCell	B cells/A	B cells/A/5-10-24-38-95+	193	0.006	0.004	0.159
BCell	B cells/A	B cells/A/10-24-38-95+	193	0.005	0.004	0.24
BCell	B cells/A	B cells/A/5-24-38-95+	194	0.005	0.004	0.221
BCell	B cells/A	B cells/A/24-38-95+	193	0.003	0.004	0.427
BCell	B cells/A	B cells/A/5-10-21+24-38-95+	194	0.005	0.005	0.327
BCell	B cells/A	B cells/A/10-21+24-38-95+	193	0.005	0.005	0.388
BCell	B cells/A	B cells/A/21+24-38-95+	193	0.003	0.005	0.557
BCell	B cells/A	B cells/A/5-21-38-95+	191	0.014	0.005	8.56e-03
BCell	B cells/A	B cells/A/5-10-38-95+	196	0.006	0.004	0.108
BCell	B cells/A	B cells/A/10-38-95+	196	0.006	0.004	0.116
BCell	B cells/A	B cells/A/5-38-95+	196	0.006	0.004	0.115
BCell	B cells/A	B cells/A/38-95+	196	0.005	0.003	0.128
BCell	B cells/A	B cells/A/5-10-21+38-95+	195	0.006	0.004	0.129
BCell	B cells/A	B cells/A/10-21+38-95+	195	0.006	0.004	0.134
BCell	B cells/A	B cells/A/5-21+38-95+	195	0.006	0.004	0.135
BCell	B cells/A	B cells/A/21+38-95+	195	0.006	0.004	0.128
BCell	B cells/A	B cells/A/5-10-24-27+38-95+	192	0.006	0.005	0.256
BCell	B cells/A	B cells/A/10-24-27+38-95+	192	0.004	0.005	0.391
BCell	B cells/A	B cells/A/5-24-27+38-95+	192	0.006	0.005	0.229
BCell	B cells/A	B cells/A/24-27+38-95+	192	0.004	0.005	0.383
BCell	B cells/A	B cells/A/10-21+24-27+38-95+	189	0.006	0.006	0.344
BCell	B cells/A	B cells/A/5-21+24-27+38-95+	190	0.006	0.006	0.335
BCell	B cells/A	B cells/A/21+24-27+38-95+	190	0.005	0.006	0.442
BCell	B cells/A	B cells/A/5-10-21+24-27+38-95+	189	0.007	0.006	0.28
BCell	B cells/A	B cells/A/5-10-27+38-95+	193	0.008	0.004	0.049
BCell	B cells/A	B cells/A/10-27+38-95+	194	0.006	0.004	0.163
BCell	B cells/A	B cells/A/5-27+38-95+	193	0.008	0.004	0.053
BCell	B cells/A	B cells/A/27+38-95+	194	0.005	0.004	0.19
BCell	B cells/A	B cells/A/5-10-21+27+38-95+	194	0.006	0.005	0.233
BCell	B cells/A	B cells/A/10-21+27+38-95+	194	0.005	0.005	0.265
BCell	B cells/A	B cells/A/5-21+27+38-95+	194	0.006	0.005	0.225
BCell	B cells/A	B cells/A/21+27+38-95+	194	0.005	0.005	0.262
BCell	B cells/A	B cells/A/5-10-21+24-95+	194	0.004	0.004	0.345
BCell	B cells/A	B cells/A/10-21+24-95+	193	0.001	0.004	0.716
BCell	B cells/A	B cells/A/5-21+24-95+	193	0.002	0.004	0.624
BCell	B cells/A	B cells/A/21+24-95+	193	0.001	0.004	0.872
BCell	B cells/A	B cells/A/5-10-24-27+95+	194	0.003	0.004	0.525
BCell	B cells/A	B cells/A/5-10-21+24-27+95+	192	0.004	0.005	0.393
BCell	B cells/A	B cells/A/10-21+24-27+95+	192	0.003	0.005	0.507
BCell	B cells/A	B cells/A/5-21+24-27+95+	193	0.004	0.005	0.433
BCell	B cells/A	B cells/A/21+24-27+95+	194	0.002	0.005	0.659
BCell	B cells/A	B cells/A/5-24+38+95+	194	-0.001	0.005	0.797
BCell	B cells/A	B cells/A/24+38+95+	194	-0.002	0.005	0.685
BCell	B cells/E	B cells/E/5-10-24-27+38-	188	0.007	0.007	0.335
BCell	B cells/G	B cells/G/5-10-38-	192	0	0.002	0.832
BCell	B cells/G	B cells/G/10-38-	194	-0.001	0.001	0.492
BCell	B cells/G	B cells/G/5-38-	192	0	0.002	0.974
BCell	B cells/G	B cells/G/38-	195	0	0.001	0.857
BCell	B cells/G	B cells/G/5-10-21+38-	193	0.003	0.002	0.224
BCell	B cells/G	B cells/G/10-21+38-	193	0.002	0.002	0.306
BCell	B cells/G	B cells/G/5-21+38-	191	0.002	0.002	0.29
BCell	B cells/G	B cells/G/21+38-	192	0.002	0.002	0.461
BCell	B cells/G	B cells/G/10-27+38-	194	0.002	0.002	0.444
BCell	B cells/G	B cells/G/27+38-	195	0.003	0.002	0.205
BCell	B cells/G	B cells/G/10-24-38+	193	-0.002	0.003	0.599
BCell	B cells/G	B cells/G/24-38+	193	0	0.003	0.958
BCell	B cells/G	B cells/G/10-38+	191	-0.004	0.003	0.175
BCell	B cells/G	B cells/G/5-38+	193	-0.002	0.003	0.509
BCell	B cells/G	B cells/G/38+	193	-0.002	0.002	0.492
BCell	B cells/G	B cells/G/24-27+38+	194	0.002	0.004	0.541
BCell	B cells/G	B cells/G/24-38+95+	195	-0.007	0.004	0.108
BCell	B cells/G	B cells/G/21+24-38+95+	187	-0.003	0.004	0.505
BCell	B cells/G	B cells/G/38+95+	197	-0.005	0.004	0.2
BCell	B cells/A	B cells/A/5+10-21+27-95-	190	0	0.008	0.985
